# Supplementary material for: Age-related profiling of DNA methylation in CD8+ T cells reveals changes in immune response and transcriptional regulator genes
Source: PubMed Central journal article supplement (PMC4541364; doi:10.1038/srep13107), 2015-08-19
Supplement: srep13107-s1.pdf [file srep13107-s1.pdf]

# Supplementary information

## **Age-related profiling of DNA methylation in CD8+ T cells reveals changes in immune response and transcriptional regulator genes**

\*Liina Tserel<sup>1</sup>, \*Raivo Kolde<sup>2</sup>, Maia Limbach<sup>1</sup>, Konstantin Tretyakov<sup>2</sup>, Silva Kasela<sup>3,4</sup>, Kai Kisand<sup>1</sup>, Mario Saare<sup>1</sup>, Jaak Vilo<sup>2</sup>, Andres Metspalu<sup>3,4</sup>, Lili Milani<sup>3†</sup> and Pärt Peterson<sup>1†</sup>

### **Supplementary files**

The following additional data are available with the online version of this paper.

Supplementary Figure S1 shows average levels and standard deviations of methylation in younger and older CD4+ and CD8+ T cells.

Supplementary Figure S2 shows genes with inverse correlation of methylation and expression of data from Human Methylation 450K and HumanHT-12v4 Expression arrays.

Supplementary Figure S3 shows the verification using the Sequenom MassARRAY platform and qPCR.

Supplementary Table S1 lists g:Profiler pathway analysis results in Figures 2A.

Supplementary Table S2A lists the differentially methylated genes with variable expression levels (and their correlation coefficients) in younger and older CD4+ T cells.

Supplementary Table S2B lists the differentially methylated genes with variable expression levels (and their correlation coefficients) in younger and older CD8+ T cells.

Supplementary Table S3 lists g:Profiler pathway analysis results in Figures 4C.

Supplementary Table S4 lists transcription factor binding sites in promoter regions of genes with inverse correlation between methylation and expression.

Supplementary Table S5 lists the oligonucleotides used for the Sequenom MassARRAY and qPCR experiments.

**Figure S1. Average methylation and methylation variability in CD4+ and CD8+ T cells.** (A) The average methylation divided according to CpG island and gene subregions. (B) Average standard deviation of methylation divided according to CpG island and gene subregions.

**A**

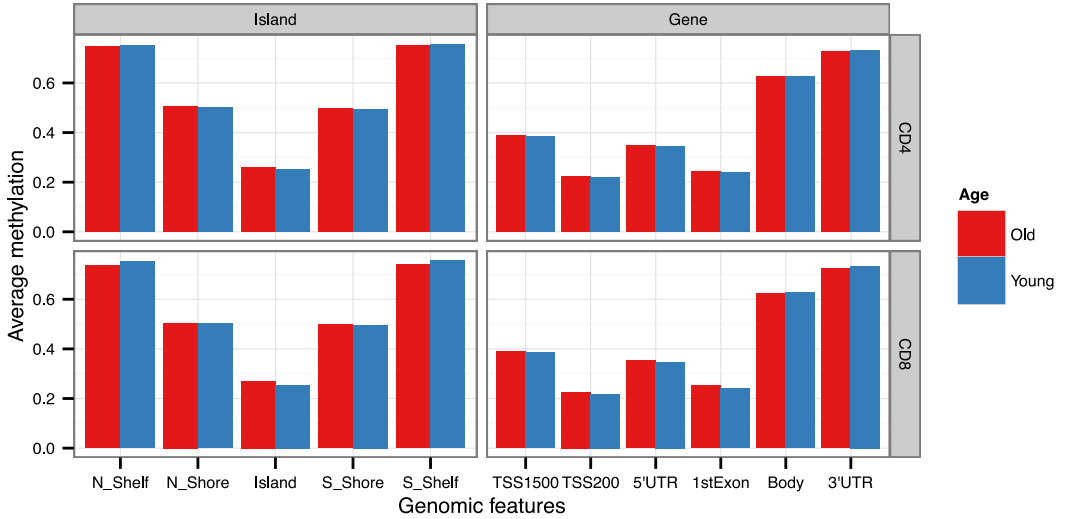

**B**

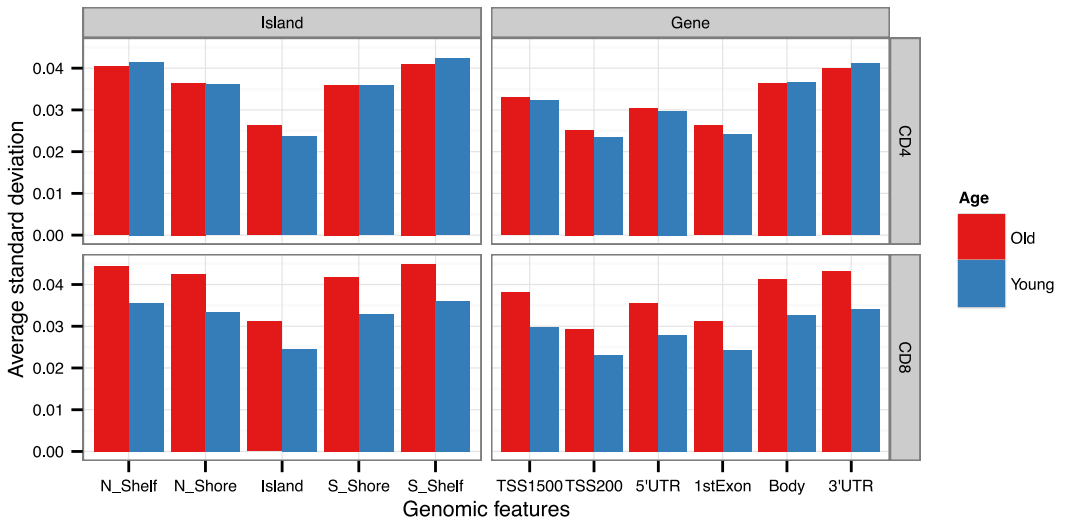

**Figure S2. Genes with inverse correlation between gene expression and DNA methylation.**

The top sections display the transcripts of the gene. The transcripts are coloured according to their fold change of expression level between younger and older individuals. The middle sections show the positions of associated CpG sites that are differentially methylated. The scatter plots in the bottom sections illustrate the correspondence between expression and methylation levels for each site separately. The scatter plots are displayed in the same order as the sites in the middle section; the red and blue dots display levels detected in the younger and older individuals, respectively.

**BCL11B**

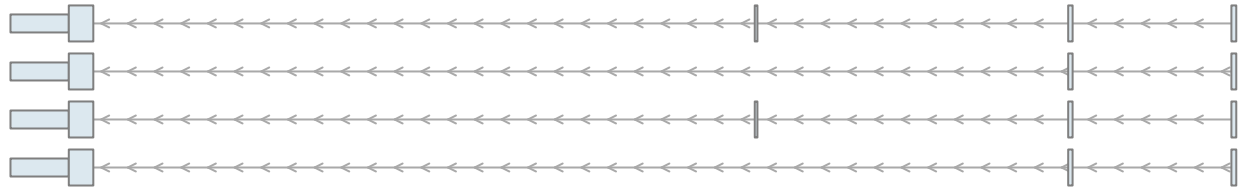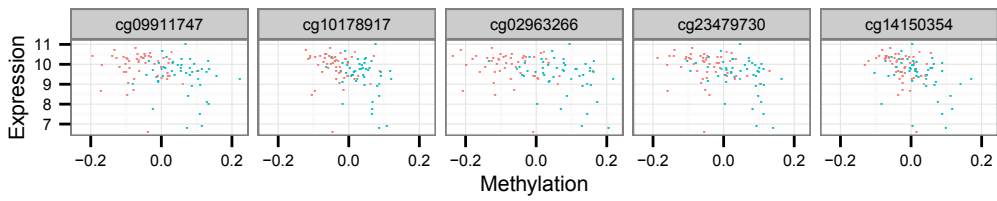

**CCL5**

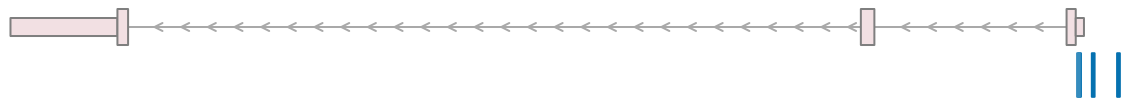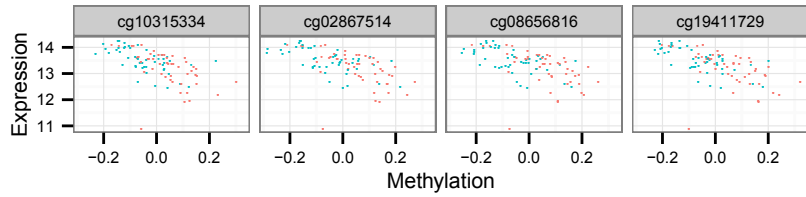

**CD3E**

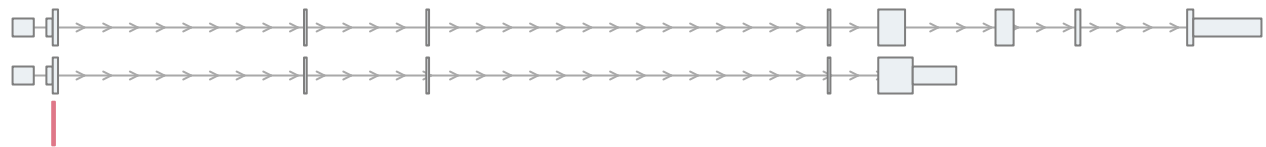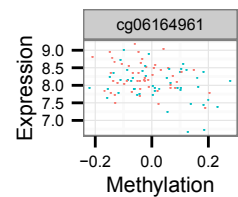

**CD27**

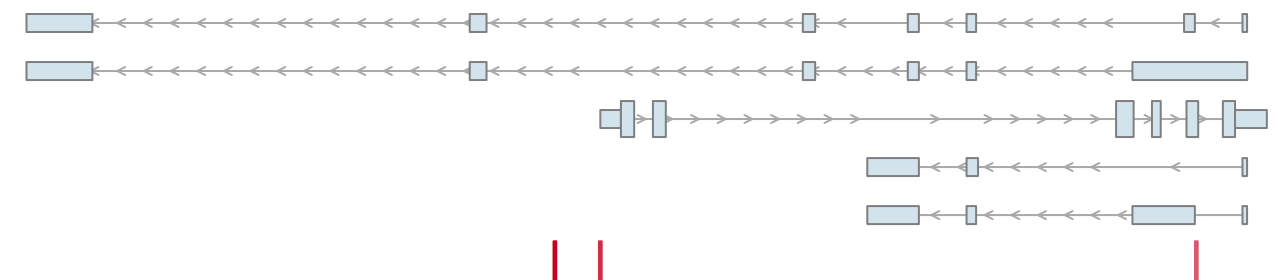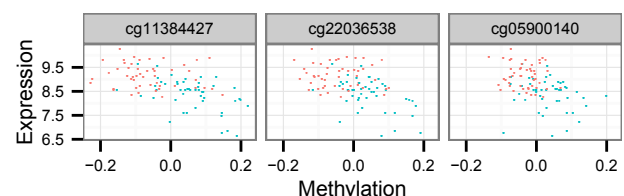

**CD248**

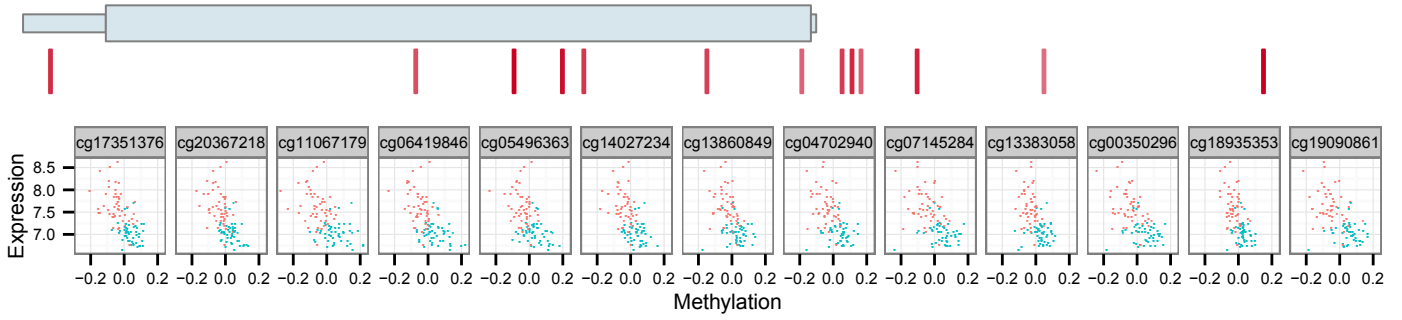

**GNLY**

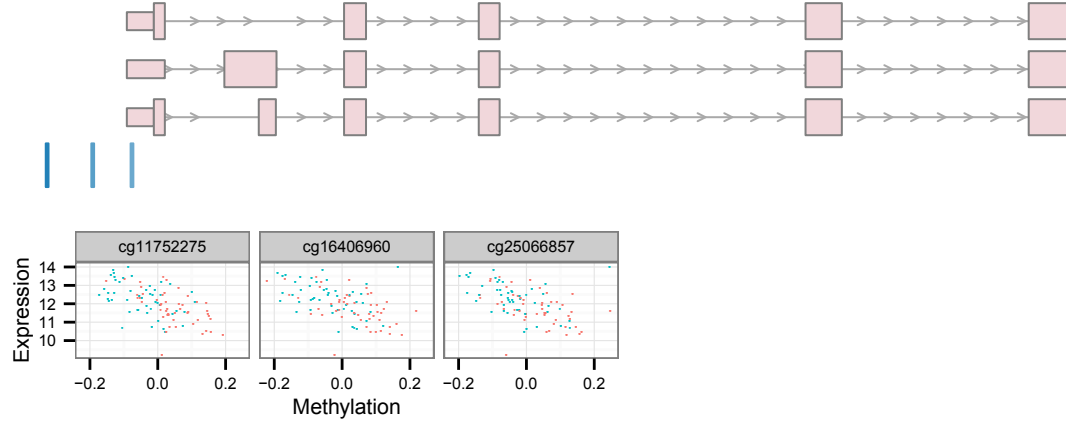

**GZMH**

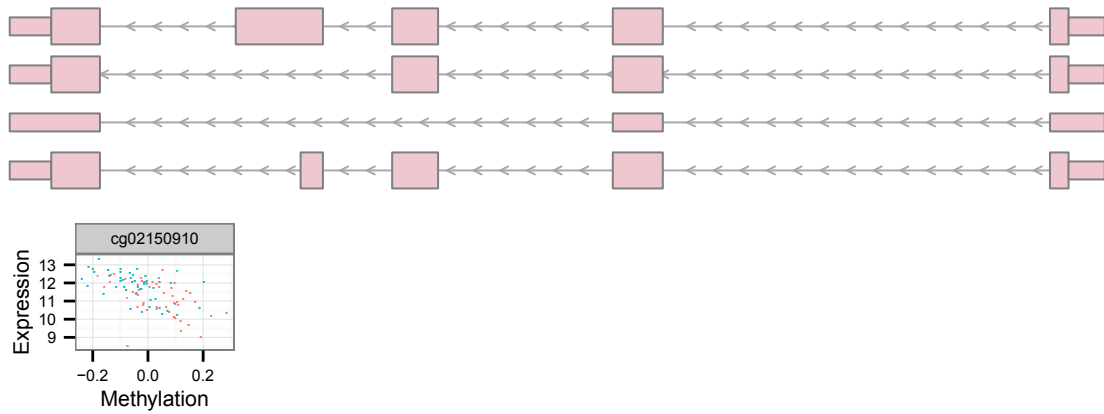

**KLRD1**

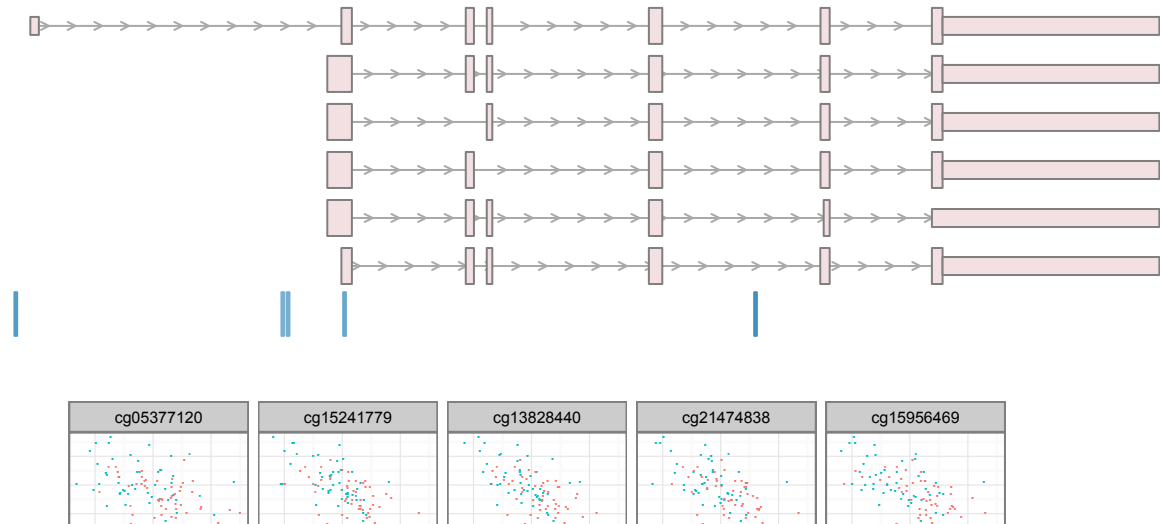

### RGS10

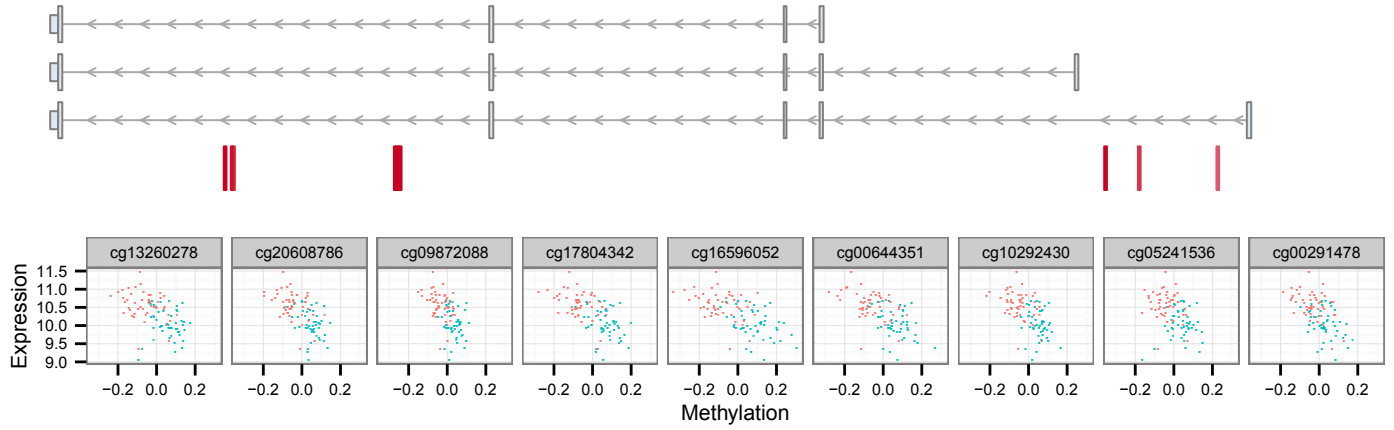

### RUNX3

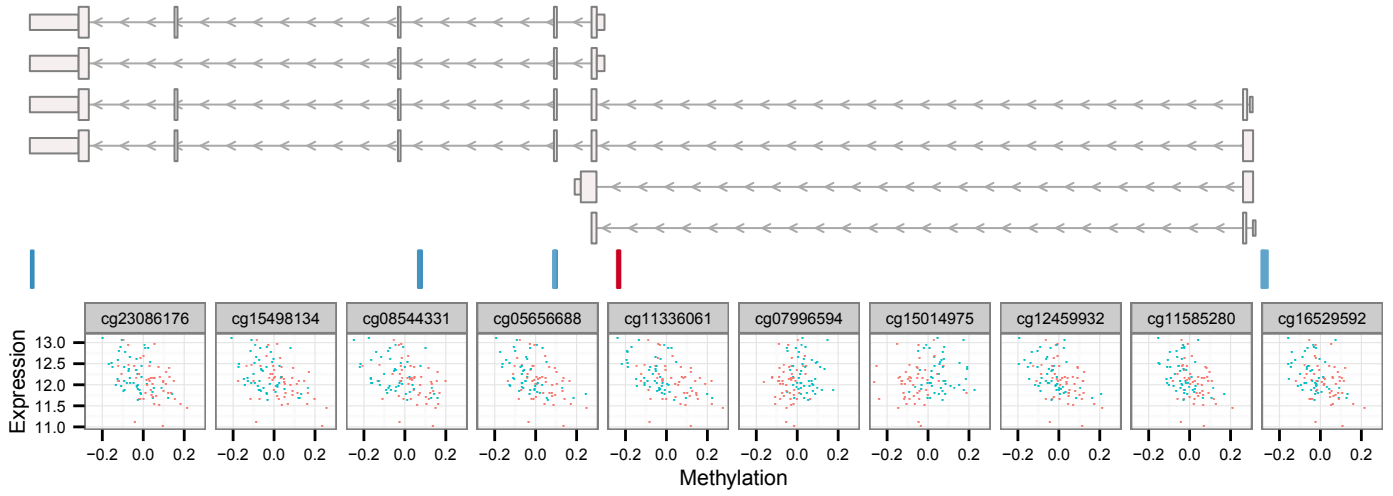

### TCF7

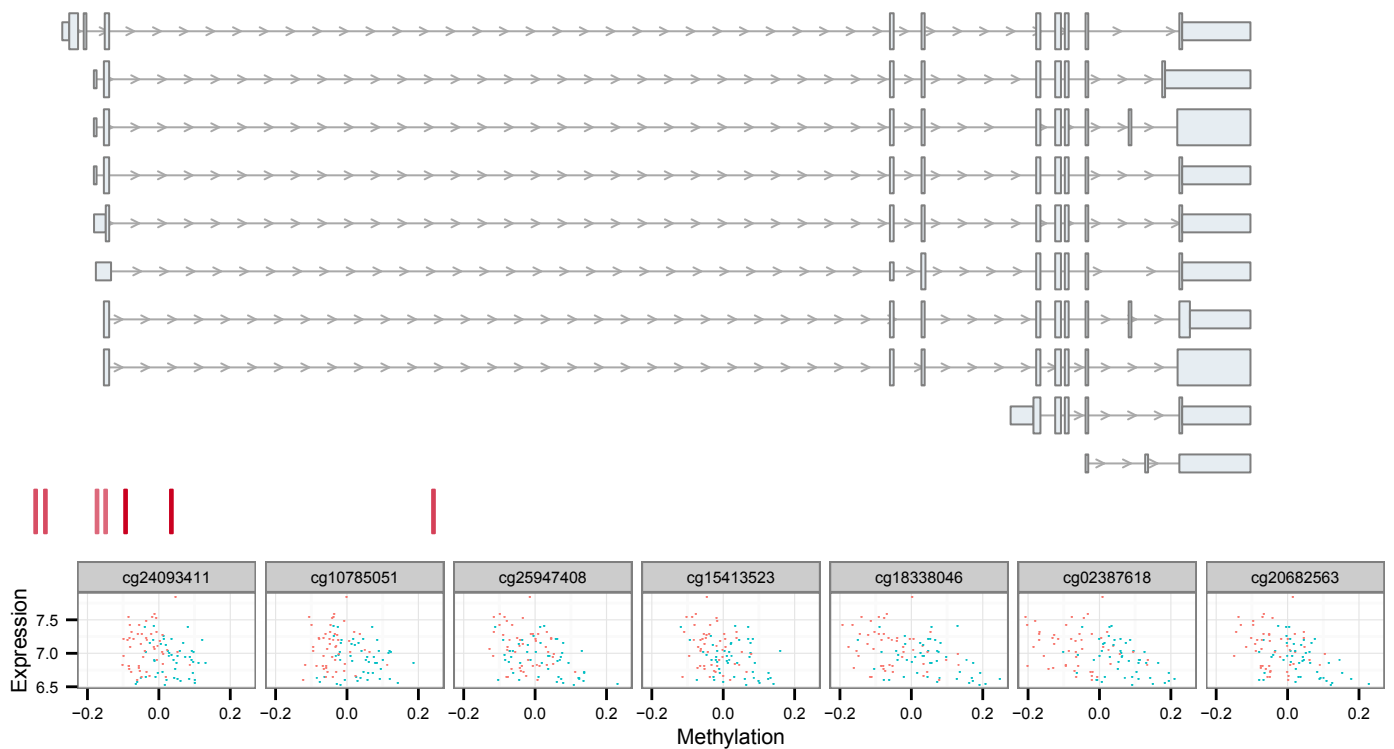

**Figure S3. Verification of the inverse methylation and gene expression in a subgroup of genes from CD8+ T cells.** To verify the age-related inverse correlation between methylation and gene expression Sequenom MassARRAY and qPCR analysis were used in a set of 14 young and 15 old subjects (IFNG, GZMH, CCR7 and CD27) or 16 young and 16 old subjects (CD248 and SATB1). Red dots represent the young and blue dots represent the old subjects, whereas sample number varies due to technical limitations of Sequenom MassARRAY. Correlation between methylation and gene expression was evaluated using the Spearman correlation coefficient. \* $P < 0.05$ , \*\* $P < 0.01$  and \*\*\* $P < 0.001$ .

### IFNG

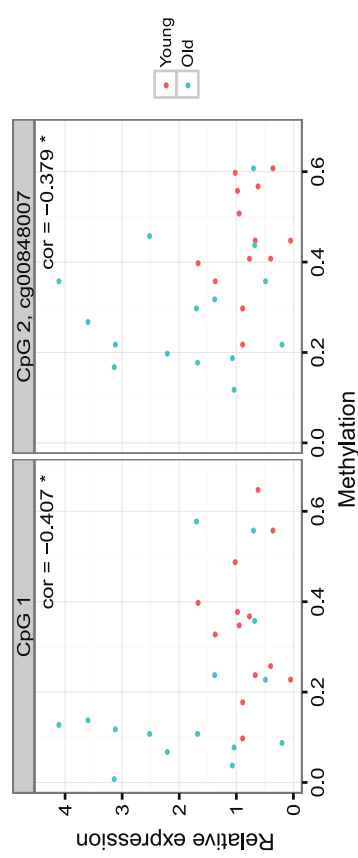

### CCR7

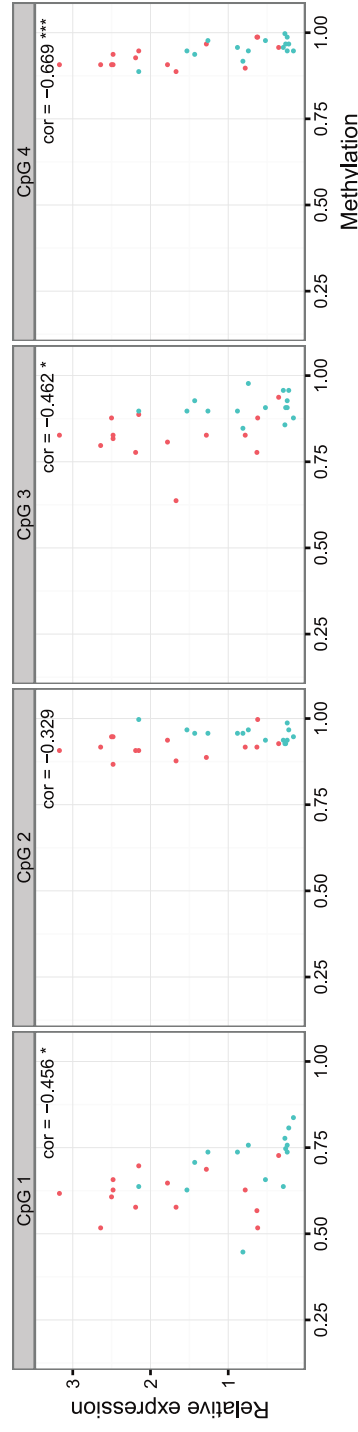

### GZMH

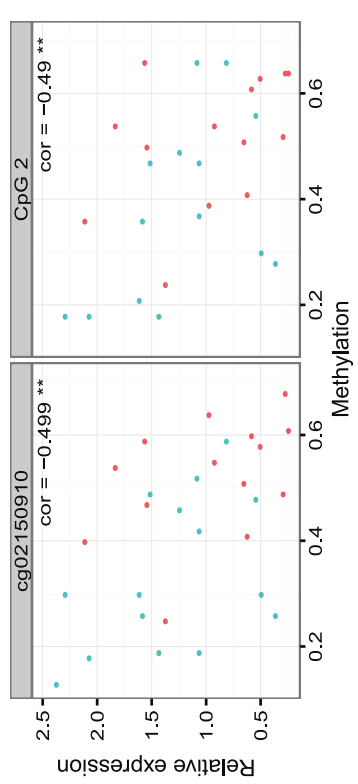

### CD27

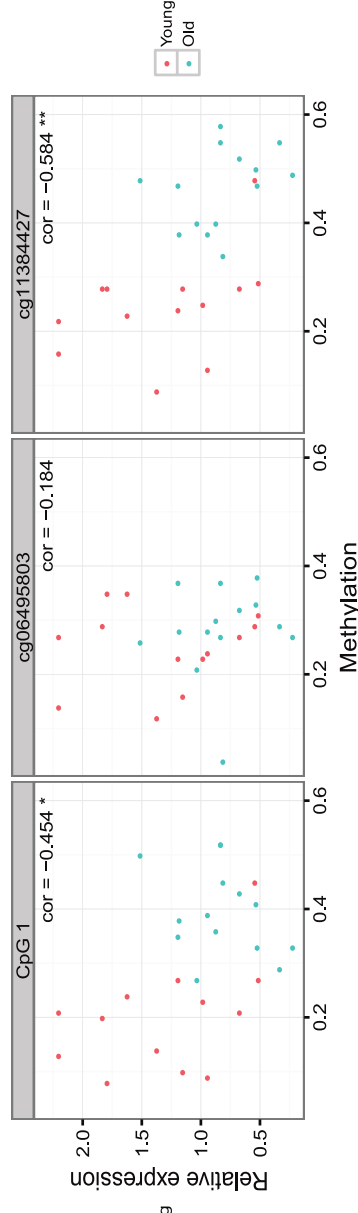

### CD248

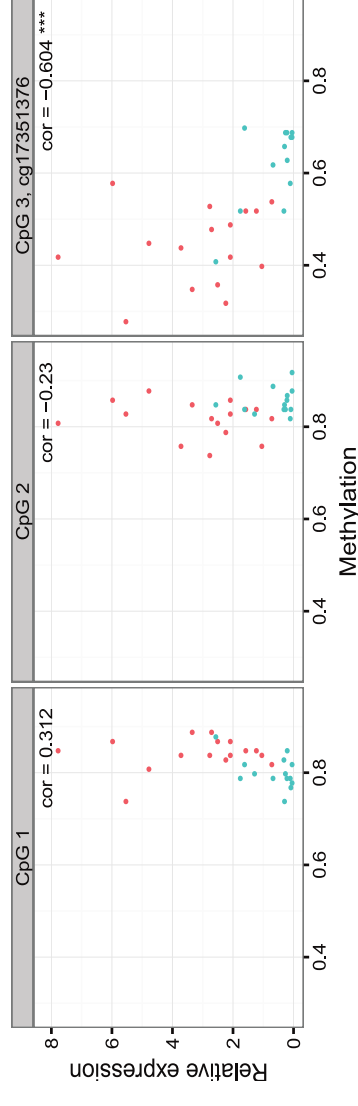

### SATB1

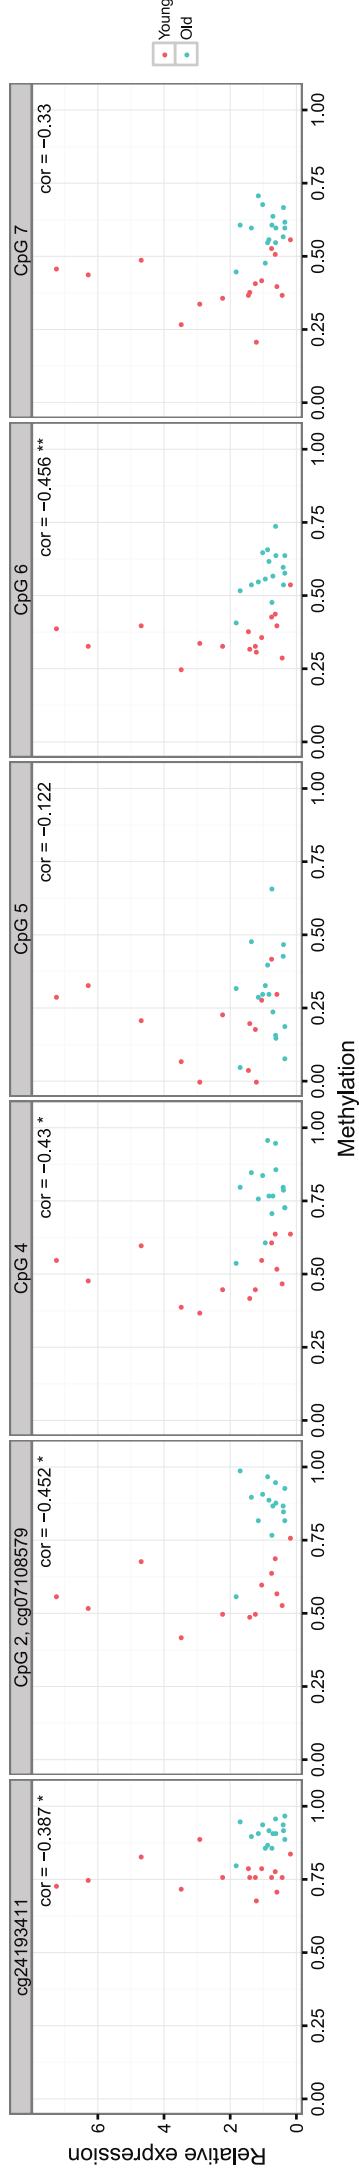

**Supplementary Table 1. List of enriched functional terms sorted by p-value. The results were generated with g:Profiler and are graphically depicted in Fig. 2A.**

| Query | p.value  | term.si | query.: overlap | precision | recall | term  | term.name                                                                      |
|-------|----------|---------|-----------------|-----------|--------|-------|--------------------------------------------------------------------------------|
| CD4   | 1,75E-10 | 696     | 1170            | 87        | 0,074  | 0,125 | GO:0042060 16 wound healing                                                    |
| CD4   | 6,42E-10 | 568     | 1170            | 75        | 0,064  | 0,132 | GO:0007599 47 hemostasis                                                       |
| CD4   | 1,08E-09 | 562     | 1170            | 74        | 0,063  | 0,132 | GO:0007596 46 blood coagulation                                                |
| CD4   | 1,62E-09 | 956     | 1166            | 105       | 0,09   | 0,11  | GO:0001775 11 cell activation                                                  |
| CD4   | 4,52E-08 | 479     | 1159            | 63        | 0,054  | 0,132 | GO:0006897 40 endocytosis                                                      |
| CD4   | 3,53E-07 | 994     | 1162            | 101       | 0,087  | 0,102 | GO:0007243 50 intracellular protein kinase cascade                             |
| CD4   | 1,05E-06 | 955     | 1166            | 97        | 0,083  | 0,102 | GO:0009967 36 positive regulation of signal transduction                       |
| CD4   | 4,39E-06 | 968     | 1098            | 92        | 0,084  | 0,095 | GO:0080134 17 regulation of response to stress                                 |
| CD4   | 2,28E-05 | 702     | 1159            | 74        | 0,064  | 0,105 | GO:0007169 39 transmembrane receptor protein tyrosine kinase signaling pathway |
| CD4   | 2,96E-05 | 653     | 1159            | 70        | 0,06   | 0,107 | GO:0070848 27 response to growth factor stimulus                               |
| CD4   | 4,42E-05 | 473     | 1172            | 56        | 0,048  | 0,118 | GO:0097190 19 apoptotic signaling pathway                                      |
| CD4   | 9,30E-05 | 259     | 1164            | 37        | 0,032  | 0,143 | GO:0007015 22 actin filament organization                                      |
| CD4   | 9,78E-05 | 254     | 1158            | 36        | 0,031  | 0,142 | REAC:109582 26 Hemostasis                                                      |
| CD4   | 0,00035  | 623     | 1166            | 65        | 0,056  | 0,104 | GO:0006954 6 inflammatory response                                             |
| CD4   | 0,000453 | 126     | 981             | 21        | 0,021  | 0,167 | GO:0042089 32 cytokine biosynthetic process                                    |
| CD4   | 0,000542 | 577     | 1166            | 61        | 0,052  | 0,106 | GO:0002764 15 immune response-regulating signaling pathway                     |
| CD4   | 0,000606 | 961     | 1175            | 89        | 0,076  | 0,093 | GO:0016477 48 cell migration                                                   |
| CD4   | 0,00061  | 628     | 1175            | 65        | 0,055  | 0,104 | GO:0048667 41 cell morphogenesis involved in neuron differentiation            |
| CD4   | 0,000857 | 667     | 1164            | 67        | 0,058  | 0,1   | GO:0042330 20 taxis                                                            |
| CD4   | 0,00123  | 512     | 1164            | 55        | 0,047  | 0,107 | GO:0032101 29 regulation of response to external stimulus                      |
| CD4   | 0,00152  | 72      | 1130            | 16        | 0,014  | 0,222 | GO:0045807 7 positive regulation of endocytosis                                |
| CD4   | 0,00161  | 58      | 1083            | 14        | 0,013  | 0,241 | GO:0018210 45 peptidyl-threonine modification                                  |
| CD4   | 0,00175  | 566     | 1175            | 59        | 0,05   | 0,104 | GO:0007409 18 axonogenesis                                                     |
| CD4   | 0,00397  | 975     | 1175            | 87        | 0,074  | 0,089 | GO:0042325 49 regulation of phosphorylation                                    |
| CD4   | 0,00438  | 111     | 774             | 16        | 0,021  | 0,144 | GO:0042476 21 odontogenesis                                                    |
| CD4   | 0,00531  | 571     | 1177            | 58        | 0,049  | 0,102 | GO:0014070 25 response to organic cyclic compound                              |
| CD4   | 0,00629  | 725     | 1156            | 68        | 0,059  | 0,094 | GO:0006812 31 cation transport                                                 |
| CD4   | 0,00633  | 262     | 1143            | 33        | 0,029  | 0,126 | GO:0070482 51 response to oxygen levels                                        |
| CD4   | 0,00644  | 715     | 1173            | 68        | 0,058  | 0,095 | GO:0048534 4 hematopoietic or lymphoid organ development                       |
| CD4   | 0,00735  | 61      | 838             | 12        | 0,014  | 0,197 | GO:0002367 23 cytokine production involved in immune response                  |
| CD4   | 0,00859  | 447     | 1175            | 48        | 0,041  | 0,107 | GO:0007265 33 Ras protein signal transduction                                  |
| CD4   | 0,01     | 794     | 1175            | 73        | 0,062  | 0,092 | GO:0051094 2 positive regulation of developmental process                      |

**Supplementary Table S2A. Correlations of differentially methylated genes with expression levels in CD4+ T cells.**

| Gene    | CpG site ID | Chr | Position    | Methylation difference | Methylation P-value | Methylation FDR | Expression probe ID (ILMN *) | Expression logFC | Expression P-value | Expression FDR | Methylation-expression correlation |
|---------|-------------|-----|-------------|------------------------|---------------------|-----------------|------------------------------|------------------|--------------------|----------------|------------------------------------|
| FLNB    | cg17338821  | 3   | 57 995 782  | 0,057                  | 4,52E-14            | 1,17E-10        | 1664922                      | -0,009           | 3,68E-11           | 3,72E-07       | -0,49                              |
| LGALS1  | cg21737444  | 22  | 38 071 591  | -0,059                 | 4,73E-06            | 6,47E-05        | 1723978                      | 0,010            | 1,51E-09           | 7,63E-06       | -0,47                              |
| LGALS1  | cg07219769  | 22  | 38 071 455  | -0,054                 | 6,96E-06            | 8,77E-05        | 1723978                      | 0,010            | 1,51E-09           | 7,63E-06       | -0,47                              |
| FLNB    | cg23730027  | 3   | 57 995 180  | 0,070                  | 2,41E-07            | 6,54E-06        | 1664922                      | -0,009           | 3,68E-11           | 3,72E-07       | -0,39                              |
| NUCB2   | cg02075820  | 11  | 17 300 909  | 0,055                  | 1,07E-04            | 8,13E-04        | 1655913                      | -0,006           | 1,24E-06           | 2,18E-03       | -0,38                              |
| ACTN1   | cg15867698  | 14  | 69 438 267  | 0,067                  | 2,49E-10            | 4,23E-08        | 2232177                      | -0,009           | 2,07E-05           | 1,79E-02       | -0,37                              |
| INPP4B  | cg18376497  | 4   | 143 488 622 | -0,065                 | 7,01E-09            | 4,72E-07        | 2198878                      | 0,008            | 9,74E-07           | 1,79E-03       | -0,36                              |
| PDE4D   | cg03323696  | 5   | 59 189 120  | 0,085                  | 5,77E-12            | 3,00E-09        | 1893697                      | -0,003           | 8,00E-05           | 4,91E-02       | -0,23                              |
| FLNB    | cg12194336  | 3   | 58 067 906  | 0,050                  | 1,46E-05            | 1,60E-04        | 1664922                      | -0,009           | 3,68E-11           | 3,72E-07       | -0,22                              |
| PDE4D   | cg24628676  | 5   | 59 189 846  | 0,052                  | 1,82E-09            | 1,77E-07        | 1893697                      | -0,003           | 8,00E-05           | 4,91E-02       | -0,20                              |
| CTLA4   | cg26091609  | 2   | 204 734 181 | -0,054                 | 2,59E-04            | 1,70E-03        | 1763487                      | 0,008            | 5,03E-05           | 3,43E-02       | -0,18                              |
| PDE4D   | cg07190535  | 5   | 59 189 843  | 0,056                  | 1,30E-11            | 5,29E-09        | 1893697                      | -0,003           | 8,00E-05           | 4,91E-02       | -0,18                              |
| PDE4D   | cg26078977  | 5   | 59 189 467  | 0,065                  | 8,32E-11            | 1,95E-08        | 1893697                      | -0,003           | 8,00E-05           | 4,91E-02       | -0,16                              |
| B3GALT5 | cg26390598  | 21  | 41 032 396  | -0,063                 | 1,17E-06            | 2,18E-05        | 2378654                      | 0,001            | 3,40E-05           | 2,55E-02       | -0,14                              |
| CD70    | cg11904429  | 19  | 6 592 554   | -0,050                 | 2,46E-03            | 1,13E-02        | 1760247                      | 0,003            | 4,77E-06           | 5,68E-03       | -0,12                              |
| ACTN1   | cg00739471  | 14  | 69 415 588  | 0,059                  | 1,90E-05            | 1,98E-04        | 2232177                      | -0,009           | 2,07E-05           | 1,79E-02       | -0,10                              |
| AUTS2   | cg14797899  | 7   | 69 882 555  | -0,052                 | 2,27E-08            | 1,12E-06        | 1749081                      | -0,006           | 4,94E-05           | 3,43E-02       | -0,05                              |
| AUTS2   | cg09703727  | 7   | 69 447 465  | -0,062                 | 4,14E-08            | 1,75E-06        | 1749081                      | -0,006           | 4,94E-05           | 3,43E-02       | 0,04                               |
| AUTS2   | cg08903389  | 7   | 69 104 289  | -0,074                 | 2,42E-10            | 4,14E-08        | 1749081                      | -0,006           | 4,94E-05           | 3,43E-02       | 0,08                               |
| ZFH3    | cg05704496  | 16  | 72 993 237  | -0,079                 | 6,54E-08            | 2,47E-06        | 1808587                      | -0,002           | 5,19E-06           | 6,01E-03       | 0,09                               |
| PDE4D   | cg27583655  | 5   | 59 126 518  | -0,060                 | 2,17E-05            | 2,19E-04        | 1893697                      | -0,003           | 8,00E-05           | 4,91E-02       | 0,12                               |
| PDE4D   | cg21023952  | 5   | 59 783 035  | -0,068                 | 1,19E-07            | 3,84E-06        | 1893697                      | -0,003           | 8,00E-05           | 4,91E-02       | 0,13                               |
| AUTS2   | cg10619644  | 7   | 69 149 951  | -0,066                 | 1,09E-11            | 4,70E-09        | 1749081                      | -0,006           | 4,94E-05           | 3,43E-02       | 0,16                               |
| PDE4D   | cg07267294  | 5   | 58 893 722  | -0,082                 | 2,78E-10            | 4,58E-08        | 1893697                      | -0,003           | 8,00E-05           | 4,91E-02       | 0,16                               |
| KANK1   | cg08677535  | 9   | 505 721     | 0,059                  | 3,66E-10            | 5,53E-08        | 1773427                      | 0,005            | 5,39E-05           | 3,57E-02       | 0,21                               |
| AUTS2   | cg08474953  | 7   | 70 170 620  | -0,050                 | 2,20E-12            | 1,52E-09        | 1749081                      | -0,006           | 4,94E-05           | 3,43E-02       | 0,27                               |
| AFF3    | cg13361307  | 2   | 100 365 075 | -0,054                 | 4,01E-06            | 5,68E-05        | 1775235                      | -0,004           | 8,09E-10           | 4,68E-06       | 0,27                               |
| CNTNAP1 | cg21692620  | 17  | 40 835 849  | 0,075                  | 2,64E-12            | 1,74E-09        | 1692398                      | 0,005            | 5,43E-06           | 6,10E-03       | 0,29                               |
| AFF3    | cg14793844  | 2   | 100 516 880 | -0,072                 | 1,36E-06            | 2,45E-05        | 1775235                      | -0,004           | 8,09E-10           | 4,68E-06       | 0,30                               |
| NRCAM   | cg24429533  | 7   | 107 886 896 | -0,052                 | 7,22E-06            | 9,04E-05        | 1722809                      | -0,003           | 9,61E-09           | 4,24E-05       | 0,31                               |
| CACHD1  | cg25210796  | 1   | 65 089 808  | -0,058                 | 4,07E-06            | 5,74E-05        | 1738854                      | -0,005           | 3,46E-13           | 1,40E-08       | 0,33                               |
| MMP28   | cg11992940  | 17  | 34 094 454  | -0,057                 | 6,76E-08            | 2,53E-06        | 2399016                      | -0,004           | 1,06E-05           | 1,04E-02       | 0,33                               |
| PAM     | cg10640944  | 5   | 102 201 890 | 0,089                  | 3,40E-10            | 5,27E-08        | 2313901                      | 0,006            | 3,43E-06           | 4,34E-03       | 0,34                               |
| CACHD1  | cg24639703  | 1   | 64 986 155  | -0,067                 | 7,15E-06            | 8,97E-05        | 1738854                      | -0,005           | 3,46E-13           | 1,40E-08       | 0,35                               |
| NRCAM   | cg24429533  | 7   | 107 886 896 | -0,052                 | 7,22E-06            | 9,04E-05        | 2411236                      | -0,007           | 4,18E-12           | 5,64E-08       | 0,36                               |
| PAM     | cg24531022  | 5   | 102 201 825 | 0,095                  | 7,55E-13            | 7,62E-10        | 2313901                      | 0,006            | 3,43E-06           | 4,34E-03       | 0,38                               |
| CACHD1  | cg11795488  | 1   | 65 038 492  | -0,057                 | 6,19E-06            | 8,01E-05        | 1738854                      | -0,005           | 3,46E-13           | 1,40E-08       | 0,42                               |



**Supplementary Table 2B. Correlations of differentially methylated genes with variable expression levels in CD8+ T cells. Only correlations >0.30 or <-0.30 are shown.**

| Gene     | CpG site ID | Chr | Position    | Methylation difference | Methylation P-value | Methylation FDR | Expression probe ID (ILMN *) | Expression logFC | Expression P-value | Expression FDR | Methylation-expression correlation |
|----------|-------------|-----|-------------|------------------------|---------------------|-----------------|------------------------------|------------------|--------------------|----------------|------------------------------------|
| LGALS1   | cg19853760  | 22  | 38 071 677  | -0,080                 | 1,46E-13            | 2,15E-11        | 1723978                      | 0,016            | 2,12E-12           | 6,14E-09       | -0,64                              |
| LGALS1   | cg21064451  | 22  | 38 071 534  | -0,088                 | 5,97E-12            | 2,97E-10        | 1723978                      | 0,016            | 2,12E-12           | 6,14E-09       | -0,64                              |
| FLNB     | cg17338821  | 3   | 57 995 782  | 0,059                  | 4,05E-09            | 5,98E-08        | 1664922                      | -0,013           | 3,39E-12           | 9,15E-09       | -0,64                              |
| LGALS1   | cg21737444  | 22  | 38 071 591  | -0,100                 | 3,74E-10            | 8,25E-09        | 1723978                      | 0,016            | 2,12E-12           | 6,14E-09       | -0,63                              |
| RGS10    | cg17804342  | 10  | 121 271 663 | 0,135                  | 5,08E-16            | 9,57E-13        | 1733538                      | -0,011           | 2,26E-11           | 3,92E-08       | -0,62                              |
| ACTN1    | cg04958055  | 14  | 69 404 437  | 0,054                  | 1,02E-04            | 3,96E-04        | 2232177                      | -0,017           | 1,94E-07           | 6,35E-05       | -0,62                              |
| CD248    | cg17351376  | 11  | 66 082 046  | 0,081                  | 8,97E-12            | 4,07E-10        | 1726589                      | -0,012           | 5,95E-15           | 4,81E-11       | -0,62                              |
| RGS10    | cg16596052  | 10  | 121 271 746 | 0,176                  | 7,69E-16            | 1,14E-12        | 1733538                      | -0,011           | 2,26E-11           | 3,92E-08       | -0,62                              |
| KLRD1    | cg13828440  | 12  | 10 459 972  | -0,053                 | 2,29E-03            | 6,66E-03        | 1799134                      | 0,011            | 2,14E-04           | 1,63E-02       | -0,62                              |
| CCR7     | cg23663547  | 17  | 38 710 320  | 0,092                  | 1,31E-11            | 5,43E-10        | 1715131                      | -0,025           | 7,90E-15           | 5,33E-11       | -0,62                              |
| RGS10    | cg00644351  | 10  | 121 271 840 | 0,130                  | 4,74E-13            | 4,75E-11        | 1733538                      | -0,011           | 2,26E-11           | 3,92E-08       | -0,62                              |
| RGS10    | cg20608786  | 10  | 121 265 838 | 0,093                  | 1,14E-12            | 8,78E-11        | 1733538                      | -0,011           | 2,26E-11           | 3,92E-08       | -0,61                              |
| CCL5     | cg19411729  | 17  | 34 207 663  | -0,105                 | 4,41E-06            | 2,35E-05        | 2098126                      | 0,010            | 9,37E-06           | 1,54E-03       | -0,61                              |
| KLRD1    | cg15241779  | 12  | 10 459 912  | -0,051                 | 5,08E-03            | 1,36E-02        | 1799134                      | 0,011            | 2,14E-04           | 1,63E-02       | -0,61                              |
| GNLY     | cg11752275  | 2   | 85 921 036  | -0,088                 | 2,63E-08            | 2,86E-07        | 1708779                      | 0,012            | 1,05E-03           | 4,82E-02       | -0,61                              |
| KLRD1    | cg15241779  | 12  | 10 459 912  | -0,051                 | 5,08E-03            | 1,36E-02        | 1797988                      | 0,010            | 2,83E-05           | 3,65E-03       | -0,59                              |
| KLRD1    | cg13828440  | 12  | 10 459 972  | -0,053                 | 2,29E-03            | 6,66E-03        | 1797988                      | 0,010            | 2,83E-05           | 3,65E-03       | -0,59                              |
| LGALS1   | cg07219769  | 22  | 38 071 455  | -0,100                 | 5,01E-13            | 4,92E-11        | 1723978                      | 0,016            | 2,12E-12           | 6,14E-09       | -0,59                              |
| CCL5     | cg10315334  | 17  | 34 207 332  | -0,081                 | 3,37E-05            | 1,45E-04        | 2098126                      | 0,010            | 9,37E-06           | 1,54E-03       | -0,59                              |
| KLRD1    | cg15956469  | 12  | 10 465 272  | -0,075                 | 3,73E-04            | 1,28E-03        | 1799134                      | 0,011            | 2,14E-04           | 1,63E-02       | -0,59                              |
| CCL5     | cg02867514  | 17  | 34 207 341  | -0,104                 | 9,00E-06            | 4,44E-05        | 2098126                      | 0,010            | 9,37E-06           | 1,54E-03       | -0,59                              |
| SPINT2   | cg27176870  | 19  | 38 754 930  | 0,065                  | 7,29E-10            | 1,43E-08        | 1800739                      | -0,011           | 3,68E-08           | 1,78E-05       | -0,59                              |
| KLRD1    | cg15956469  | 12  | 10 465 272  | -0,075                 | 3,73E-04            | 1,28E-03        | 1797988                      | 0,010            | 2,83E-05           | 3,65E-03       | -0,58                              |
| CD248    | cg18935353  | 11  | 66 085 250  | 0,055                  | 7,28E-11            | 2,15E-09        | 1726589                      | -0,012           | 5,95E-15           | 4,81E-11       | -0,58                              |
| GNLY     | cg16406960  | 2   | 85 921 252  | -0,066                 | 3,56E-04            | 1,23E-03        | 1708779                      | 0,012            | 1,05E-03           | 4,82E-02       | -0,58                              |
| CD248    | cg06419846  | 11  | 66 083 697  | 0,094                  | 1,72E-12            | 1,18E-10        | 1726589                      | -0,012           | 5,95E-15           | 4,81E-11       | -0,58                              |
| NMUR1    | cg03164561  | 2   | 232 396 386 | -0,057                 | 6,62E-04            | 2,16E-03        | 1729287                      | 0,002            | 1,08E-03           | 4,91E-02       | -0,58                              |
| ABLIM1   | cg14608903  | 10  | 116 287 249 | 0,073                  | 7,45E-09            | 9,97E-08        | 1785424                      | -0,018           | 9,63E-12           | 1,95E-08       | -0,58                              |
| KLRD1    | cg21474838  | 12  | 10 460 612  | -0,059                 | 1,49E-03            | 4,51E-03        | 1799134                      | 0,011            | 2,14E-04           | 1,63E-02       | -0,58                              |
| NMUR1    | cg24430754  | 2   | 232 396 241 | -0,083                 | 1,53E-05            | 7,13E-05        | 1729287                      | 0,002            | 1,08E-03           | 4,91E-02       | -0,58                              |
| NRCAM    | cg06570167  | 7   | 108 095 719 | 0,057                  | 1,09E-09            | 2,01E-08        | 2411236                      | -0,020           | 2,37E-21           | 9,60E-17       | -0,57                              |
| CD248    | cg20367218  | 11  | 66 083 224  | 0,068                  | 3,33E-11            | 1,14E-09        | 1726589                      | -0,012           | 5,95E-15           | 4,81E-11       | -0,57                              |
| APOBEC3H | cg24424889  | 22  | 39 494 175  | -0,093                 | 2,39E-06            | 1,37E-05        | 1664828                      | 0,007            | 1,36E-05           | 2,09E-03       | -0,57                              |
| PATL2    | cg01647795  | 15  | 44 969 244  | -0,076                 | 8,31E-06            | 4,14E-05        | 1768551                      | 0,014            | 6,76E-09           | 4,97E-06       | -0,57                              |
| GNLY     | cg11752275  | 2   | 85 921 036  | -0,088                 | 2,63E-08            | 2,86E-07        | 1790692                      | 0,015            | 2,19E-04           | 1,66E-02       | -0,57                              |
| RGS10    | cg00291478  | 10  | 121 301 041 | 0,064                  | 1,72E-06            | 1,02E-05        | 1733538                      | -0,011           | 2,26E-11           | 3,92E-08       | -0,57                              |
| GZMH     | cg02150910  | 14  | 25 079 357  | -0,068                 | 9,56E-04            | 3,02E-03        | 1731233                      | 0,021            | 7,97E-08           | 3,16E-05       | -0,57                              |
| RGS10    | cg10292430  | 10  | 121 297 031 | 0,101                  | 9,06E-16            | 1,24E-12        | 1733538                      | -0,011           | 2,26E-11           | 3,92E-08       | -0,57                              |
| PCSK5    | cg13670316  | 9   | 78 507 533  | 0,080                  | 1,25E-11            | 5,25E-10        | 1767934                      | -0,012           | 1,52E-13           | 7,67E-10       | -0,57                              |

|         |            |    |             |        |          |          |         |        |          |          |       |
|---------|------------|----|-------------|--------|----------|----------|---------|--------|----------|----------|-------|
| ACTN1   | cg08152926 | 14 | 69 446 685  | 0,070  | 5,03E-08 | 4,92E-07 | 2232177 | -0,017 | 1,94E-07 | 6,35E-05 | -0,56 |
| CCL5    | cg08656816 | 17 | 34 207 454  | -0,115 | 3,69E-07 | 2,68E-06 | 2098126 | 0,010  | 9,37E-06 | 1,54E-03 | -0,56 |
| CHMP7   | cg16193207 | 8  | 23 107 961  | 0,110  | 1,82E-13 | 2,48E-11 | 1795933 | -0,010 | 6,94E-09 | 4,97E-06 | -0,56 |
| TXK     | cg17984638 | 4  | 48 136 452  | 0,106  | 1,43E-08 | 1,72E-07 | 1741143 | -0,013 | 3,56E-10 | 4,50E-07 | -0,56 |
| CD248   | cg00350296 | 11 | 66 084 841  | 0,086  | 2,53E-08 | 2,77E-07 | 1726589 | -0,012 | 5,95E-15 | 4,81E-11 | -0,56 |
| CD248   | cg14027234 | 11 | 66 084 163  | 0,074  | 4,81E-12 | 2,52E-10 | 1726589 | -0,012 | 5,95E-15 | 4,81E-11 | -0,56 |
| ADRB2   | cg08370787 | 5  | 148 208 041 | -0,069 | 2,72E-06 | 1,53E-05 | 1695590 | 0,009  | 1,01E-05 | 1,63E-03 | -0,56 |
| CDK5R1  | cg19634527 | 17 | 30 814 814  | 0,095  | 3,81E-08 | 3,91E-07 | 1730928 | -0,009 | 2,07E-07 | 6,71E-05 | -0,56 |
| LGALS1  | cg27619353 | 22 | 38 071 651  | -0,051 | 1,70E-10 | 4,28E-09 | 1723978 | 0,016  | 2,12E-12 | 6,14E-09 | -0,55 |
| RGS10   | cg09872088 | 10 | 121 265 893 | 0,072  | 1,64E-14 | 5,72E-12 | 1733538 | -0,011 | 2,26E-11 | 3,92E-08 | -0,55 |
| IFT140  | cg08006309 | 16 | 1 587 810   | 0,114  | 5,61E-12 | 2,83E-10 | 1751559 | -0,007 | 1,40E-07 | 5,07E-05 | -0,55 |
| NKG7    | cg19564512 | 19 | 51 874 939  | -0,059 | 4,23E-04 | 1,44E-03 | 1682993 | 0,012  | 7,53E-05 | 7,23E-03 | -0,55 |
| PPP2R2B | cg15021031 | 5  | 146 333 034 | -0,061 | 7,96E-06 | 3,98E-05 | 1660732 | 0,010  | 2,02E-04 | 1,57E-02 | -0,55 |
| KLRD1   | cg21474838 | 12 | 10 460 612  | -0,059 | 1,49E-03 | 4,51E-03 | 1797988 | 0,010  | 2,83E-05 | 3,65E-03 | -0,55 |
| CD248   | cg19090861 | 11 | 66 085 958  | 0,100  | 2,08E-10 | 5,07E-09 | 1726589 | -0,012 | 5,95E-15 | 4,81E-11 | -0,55 |
| ZBED3   | cg19657875 | 5  | 76 382 381  | 0,078  | 6,64E-12 | 3,22E-10 | 1915076 | -0,008 | 1,53E-09 | 1,44E-06 | -0,55 |
| TTC38   | cg04431254 | 22 | 46 684 772  | -0,057 | 1,70E-07 | 1,38E-06 | 2059886 | 0,012  | 9,05E-07 | 2,27E-04 | -0,55 |
| LRRN3   | cg09837977 | 7  | 110 731 201 | 0,108  | 3,16E-14 | 8,36E-12 | 2048591 | -0,009 | 7,67E-11 | 1,11E-07 | -0,54 |
| CD248   | cg11067179 | 11 | 66 083 541  | 0,114  | 9,95E-13 | 7,95E-11 | 1726589 | -0,012 | 5,95E-15 | 4,81E-11 | -0,54 |
| TXK     | cg02600394 | 4  | 48 136 234  | 0,088  | 1,46E-09 | 2,56E-08 | 1741143 | -0,013 | 3,56E-10 | 4,50E-07 | -0,54 |
| SPINT2  | cg23090870 | 19 | 38 755 753  | 0,079  | 2,62E-13 | 3,16E-11 | 1800739 | -0,011 | 3,68E-08 | 1,78E-05 | -0,54 |
| NKG7    | cg12916723 | 19 | 51 876 788  | -0,063 | 4,08E-05 | 1,73E-04 | 1682993 | 0,012  | 7,53E-05 | 7,23E-03 | -0,54 |
| ANXA2   | cg02072495 | 15 | 60 689 285  | -0,127 | 1,52E-09 | 2,65E-08 | 2409167 | 0,011  | 1,14E-07 | 4,25E-05 | -0,54 |
| CD27    | cg11384427 | 12 | 6 553 585   | 0,119  | 2,64E-10 | 6,17E-09 | 1688959 | -0,014 | 8,39E-09 | 5,66E-06 | -0,54 |
| PDE9A   | cg08729135 | 21 | 44 073 555  | 0,052  | 5,44E-08 | 5,26E-07 | 2306540 | -0,015 | 1,61E-11 | 2,96E-08 | -0,54 |
| FAM134B | cg00461022 | 5  | 16 618 052  | 0,115  | 1,18E-13 | 1,88E-11 | 2387952 | -0,012 | 2,23E-09 | 2,00E-06 | -0,54 |
| ACTN1   | cg13693582 | 14 | 69 441 902  | 0,086  | 2,65E-10 | 6,18E-09 | 2232177 | -0,017 | 1,94E-07 | 6,35E-05 | -0,53 |
| CD248   | cg05496363 | 11 | 66 083 766  | 0,078  | 5,30E-10 | 1,10E-08 | 1726589 | -0,012 | 5,95E-15 | 4,81E-11 | -0,53 |
| RASSF1  | cg19854901 | 3  | 50 376 216  | -0,117 | 1,45E-10 | 3,76E-09 | 1734205 | 0,006  | 1,11E-03 | 4,99E-02 | -0,53 |
| SATB1   | cg01373248 | 3  | 18 480 297  | 0,065  | 1,19E-09 | 2,16E-08 | 3247857 | -0,007 | 7,00E-09 | 4,97E-06 | -0,53 |
| TXK     | cg20981615 | 4  | 48 136 280  | 0,104  | 2,53E-09 | 4,04E-08 | 1741143 | -0,013 | 3,56E-10 | 4,50E-07 | -0,53 |
| RASSF1  | cg05989693 | 3  | 50 376 155  | -0,060 | 3,02E-07 | 2,25E-06 | 1734205 | 0,006  | 1,11E-03 | 4,99E-02 | -0,53 |
| PATL2   | cg01647795 | 15 | 44 969 244  | -0,076 | 8,31E-06 | 4,14E-05 | 3229046 | 0,009  | 9,23E-08 | 3,53E-05 | -0,53 |
| FAM102A | cg13805537 | 9  | 130 728 012 | 0,090  | 2,32E-09 | 3,77E-08 | 2401779 | -0,015 | 1,33E-10 | 1,86E-07 | -0,53 |
| CHMP7   | cg17048073 | 8  | 23 102 091  | 0,096  | 1,18E-09 | 2,14E-08 | 1795933 | -0,010 | 6,94E-09 | 4,97E-06 | -0,53 |
| FBLN2   | cg01896761 | 3  | 13 590 444  | 0,106  | 1,64E-11 | 6,49E-10 | 1774602 | -0,011 | 2,16E-19 | 4,36E-15 | -0,53 |
| GNLY    | cg16406960 | 2  | 85 921 252  | -0,066 | 3,56E-04 | 1,23E-03 | 1790692 | 0,015  | 2,19E-04 | 1,66E-02 | -0,53 |
| LDLRAP1 | cg04344749 | 1  | 25 871 814  | 0,062  | 4,70E-08 | 4,65E-07 | 1809040 | -0,008 | 6,75E-07 | 1,74E-04 | -0,52 |
| ACTN1   | cg15867698 | 14 | 69 438 267  | 0,094  | 1,26E-13 | 1,97E-11 | 2232177 | -0,017 | 1,94E-07 | 6,35E-05 | -0,52 |
| PATL2   | cg05129597 | 15 | 44 970 408  | -0,077 | 3,73E-08 | 3,84E-07 | 3229046 | 0,009  | 9,23E-08 | 3,53E-05 | -0,52 |
| IFT140  | cg09757087 | 16 | 1 585 644   | 0,051  | 2,63E-03 | 7,55E-03 | 1751559 | -0,007 | 1,40E-07 | 5,07E-05 | -0,52 |
| SATB1   | cg26768584 | 3  | 18 480 242  | 0,109  | 2,04E-09 | 3,39E-08 | 3247857 | -0,007 | 7,00E-09 | 4,97E-06 | -0,52 |
| PATL2   | cg05129597 | 15 | 44 970 408  | -0,077 | 3,73E-08 | 3,84E-07 | 1768551 | 0,014  | 6,76E-09 | 4,97E-06 | -0,52 |

|          |            |    |             |        |          |          |         |        |          |          |       |
|----------|------------|----|-------------|--------|----------|----------|---------|--------|----------|----------|-------|
| CRTC3    | cg03348466 | 15 | 91 104 770  | 0,058  | 7,84E-11 | 2,28E-09 | 3260715 | -0,007 | 1,09E-04 | 9,82E-03 | -0,52 |
| SPINT2   | cg15375239 | 19 | 38 755 287  | 0,065  | 1,29E-08 | 1,57E-07 | 1800739 | -0,011 | 3,68E-08 | 1,78E-05 | -0,52 |
| FAM102A  | cg13992008 | 9  | 130 739 838 | 0,103  | 3,14E-08 | 3,33E-07 | 1745112 | -0,012 | 5,49E-09 | 4,44E-06 | -0,52 |
| TTC38    | cg04392554 | 22 | 46 685 472  | -0,057 | 4,81E-04 | 1,62E-03 | 2059886 | 0,012  | 9,05E-07 | 2,27E-04 | -0,52 |
| PDGFD    | cg04420335 | 11 | 103 800 408 | -0,075 | 4,87E-09 | 7,00E-08 | 1803094 | 0,005  | 4,85E-04 | 2,90E-02 | -0,52 |
| GNLY     | cg25066857 | 2  | 85 921 438  | -0,058 | 1,50E-03 | 4,53E-03 | 1708779 | 0,012  | 1,05E-03 | 4,82E-02 | -0,52 |
| KCNT1    | cg04927695 | 9  | 138 677 436 | -0,056 | 4,91E-10 | 1,03E-08 | 1702255 | 0,004  | 5,85E-04 | 3,32E-02 | -0,51 |
| CDK5R1   | cg07437263 | 17 | 30 817 129  | 0,078  | 4,04E-09 | 5,97E-08 | 1730928 | -0,009 | 2,07E-07 | 6,71E-05 | -0,51 |
| FBLN2    | cg01896761 | 3  | 13 590 444  | 0,106  | 1,64E-11 | 6,49E-10 | 2390919 | -0,009 | 1,62E-17 | 2,18E-13 | -0,51 |
| FBLN2    | cg18603228 | 3  | 13 590 439  | 0,066  | 1,19E-09 | 2,16E-08 | 2390919 | -0,009 | 1,62E-17 | 2,18E-13 | -0,51 |
| BACH2    | cg03035849 | 6  | 91 003 200  | 0,103  | 3,50E-13 | 3,87E-11 | 1670695 | -0,007 | 2,54E-10 | 3,31E-07 | -0,51 |
| PPP2R2B  | cg08991927 | 5  | 146 436 805 | -0,078 | 3,06E-09 | 4,73E-08 | 1660732 | 0,010  | 2,02E-04 | 1,57E-02 | -0,51 |
| CD248    | cg04702940 | 11 | 66 084 599  | 0,076  | 3,95E-10 | 8,62E-09 | 1726589 | -0,012 | 5,95E-15 | 4,81E-11 | -0,51 |
| S100A10  | cg20167074 | 1  | 151 967 023 | -0,050 | 2,20E-04 | 7,93E-04 | 2046730 | 0,006  | 1,66E-04 | 1,34E-02 | -0,51 |
| MCOLN2   | cg02621376 | 1  | 85 461 303  | -0,104 | 7,38E-06 | 3,72E-05 | 1660462 | 0,011  | 4,90E-05 | 5,42E-03 | -0,51 |
| C1orf228 | cg14658964 | 1  | 45 189 026  | 0,089  | 3,09E-08 | 3,28E-07 | 1663068 | -0,014 | 1,50E-08 | 8,93E-06 | -0,51 |
| S100A10  | cg13445177 | 1  | 151 967 021 | -0,092 | 1,24E-05 | 5,92E-05 | 2046730 | 0,006  | 1,66E-04 | 1,34E-02 | -0,51 |
| CD27     | cg22036538 | 12 | 6 554 051   | 0,081  | 2,54E-08 | 2,78E-07 | 1688959 | -0,014 | 8,39E-09 | 5,66E-06 | -0,51 |
| KCNT1    | cg14435098 | 9  | 138 669 066 | -0,063 | 1,04E-05 | 5,07E-05 | 1702255 | 0,004  | 5,85E-04 | 3,32E-02 | -0,51 |
| GNLY     | cg25066857 | 2  | 85 921 438  | -0,058 | 1,50E-03 | 4,53E-03 | 1790692 | 0,015  | 2,19E-04 | 1,66E-02 | -0,50 |
| MAL      | cg19762657 | 2  | 95 692 524  | 0,067  | 2,61E-11 | 9,38E-10 | 2320330 | -0,015 | 2,98E-07 | 9,07E-05 | -0,50 |
| SATB1    | cg01373248 | 3  | 18 480 297  | 0,065  | 1,19E-09 | 2,16E-08 | 1690646 | -0,012 | 1,61E-10 | 2,17E-07 | -0,50 |
| IFNG     | cg01940810 | 12 | 68 551 655  | -0,084 | 2,92E-06 | 1,63E-05 | 2207291 | 0,019  | 3,03E-07 | 9,16E-05 | -0,50 |
| IFT140   | cg09757087 | 16 | 1 585 644   | 0,051  | 2,63E-03 | 7,55E-03 | 3241657 | -0,007 | 2,82E-07 | 8,79E-05 | -0,50 |
| CD248    | cg07145284 | 11 | 66 084 631  | 0,084  | 7,84E-08 | 7,15E-07 | 1726589 | -0,012 | 5,95E-15 | 4,81E-11 | -0,50 |
| ACTN1    | cg26303870 | 14 | 69 443 683  | 0,057  | 3,24E-10 | 7,31E-09 | 2232177 | -0,017 | 1,94E-07 | 6,35E-05 | -0,50 |
| KCNT1    | cg13730736 | 9  | 138 653 071 | -0,054 | 1,29E-08 | 1,57E-07 | 1702255 | 0,004  | 5,85E-04 | 3,32E-02 | -0,50 |
| PPP2R2B  | cg19494588 | 5  | 146 195 103 | -0,085 | 7,88E-07 | 5,16E-06 | 1660732 | 0,010  | 2,02E-04 | 1,57E-02 | -0,50 |
| TGFBR2   | cg04916416 | 3  | 30 651 317  | 0,073  | 3,24E-05 | 1,40E-04 | 2384241 | -0,014 | 2,02E-06 | 4,37E-04 | -0,50 |
| KLHL3    | cg13847070 | 5  | 137 071 523 | 0,074  | 1,28E-06 | 7,86E-06 | 1770641 | -0,012 | 3,70E-08 | 1,78E-05 | -0,50 |
| RCAN2    | cg19083007 | 6  | 46 293 862  | -0,110 | 1,90E-07 | 1,52E-06 | 2120210 | 0,003  | 6,97E-04 | 3,74E-02 | -0,50 |
| DGKA     | cg15354065 | 12 | 56 327 217  | 0,081  | 7,11E-07 | 4,72E-06 | 2319910 | -0,011 | 1,83E-05 | 2,62E-03 | -0,50 |
| RUNX3    | cg11336061 | 1  | 25 254 149  | -0,087 | 3,66E-05 | 1,57E-04 | 1787461 | 0,005  | 1,03E-03 | 4,76E-02 | -0,50 |
| CD248    | cg13860849 | 11 | 66 084 469  | 0,059  | 4,62E-07 | 3,25E-06 | 1726589 | -0,012 | 5,95E-15 | 4,81E-11 | -0,50 |
| SCRN1    | cg08551725 | 7  | 30 029 776  | 0,071  | 1,09E-08 | 1,37E-07 | 1756439 | -0,008 | 3,11E-07 | 9,34E-05 | -0,50 |
| NRCAM    | cg09561125 | 7  | 108 097 477 | 0,066  | 1,89E-07 | 1,51E-06 | 2411236 | -0,020 | 2,37E-21 | 9,60E-17 | -0,49 |
| RASSF1   | cg20119308 | 3  | 50 376 000  | -0,079 | 1,98E-07 | 1,57E-06 | 1734205 | 0,006  | 1,11E-03 | 4,99E-02 | -0,49 |
| RASSF1   | cg05546296 | 3  | 50 376 006  | -0,103 | 3,48E-10 | 7,76E-09 | 1734205 | 0,006  | 1,11E-03 | 4,99E-02 | -0,49 |
| IFT140   | cg08006309 | 16 | 1 587 810   | 0,114  | 5,61E-12 | 2,83E-10 | 3241657 | -0,007 | 2,82E-07 | 8,79E-05 | -0,49 |
| RASSF1   | cg19811994 | 3  | 50 373 641  | -0,095 | 8,13E-09 | 1,07E-07 | 1734205 | 0,006  | 1,11E-03 | 4,99E-02 | -0,49 |
| RGS10    | cg13260278 | 10 | 121 265 587 | 0,117  | 1,37E-12 | 1,01E-10 | 1733538 | -0,011 | 2,26E-11 | 3,92E-08 | -0,49 |
| KCNT1    | cg14387909 | 9  | 138 681 581 | -0,059 | 6,15E-09 | 8,49E-08 | 1702255 | 0,004  | 5,85E-04 | 3,32E-02 | -0,49 |
| IFT140   | cg01042641 | 16 | 1 575 979   | 0,063  | 2,72E-08 | 2,95E-07 | 1751559 | -0,007 | 1,40E-07 | 5,07E-05 | -0,49 |

|          |            |    |             |        |          |          |         |        |          |          |       |
|----------|------------|----|-------------|--------|----------|----------|---------|--------|----------|----------|-------|
| SATB1    | cg07108579 | 3  | 18 391 124  | 0,109  | 9,18E-15 | 4,38E-12 | 3247857 | -0,007 | 7,00E-09 | 4,97E-06 | -0,49 |
| SLC22A17 | cg10058779 | 14 | 23 821 435  | 0,051  | 2,23E-10 | 5,37E-09 | 1653200 | -0,005 | 1,16E-07 | 4,27E-05 | -0,49 |
| PPP2R2B  | cg15021031 | 5  | 146 333 034 | -0,061 | 7,96E-06 | 3,98E-05 | 2360202 | 0,004  | 3,80E-04 | 2,44E-02 | -0,49 |
| NMUR1    | cg26913833 | 2  | 232 388 288 | -0,050 | 7,60E-05 | 3,03E-04 | 1729287 | 0,002  | 1,08E-03 | 4,91E-02 | -0,49 |
| FLNB     | cg23730027 | 3  | 57 995 180  | 0,075  | 2,04E-06 | 1,19E-05 | 1664922 | -0,013 | 3,39E-12 | 9,15E-09 | -0,49 |
| S100A11  | cg10069121 | 1  | 152 009 711 | -0,066 | 1,52E-07 | 1,25E-06 | 1750101 | 0,012  | 5,32E-05 | 5,73E-03 | -0,48 |
| FLT3LG   | cg16891376 | 19 | 49 976 438  | 0,060  | 1,20E-11 | 5,07E-10 | 2091412 | -0,008 | 5,44E-04 | 3,15E-02 | -0,48 |
| BACH2    | cg19039673 | 6  | 90 887 871  | 0,080  | 9,85E-10 | 1,85E-08 | 1670695 | -0,007 | 2,54E-10 | 3,31E-07 | -0,48 |
| FBLN2    | cg18603228 | 3  | 13 590 439  | 0,066  | 1,19E-09 | 2,16E-08 | 1774602 | -0,011 | 2,16E-19 | 4,36E-15 | -0,48 |
| PYHIN1   | cg15036529 | 1  | 158 900 644 | -0,100 | 2,22E-05 | 9,99E-05 | 2395981 | 0,009  | 1,56E-06 | 3,51E-04 | -0,48 |
| RCAN2    | cg04652496 | 6  | 46 294 097  | -0,077 | 4,90E-07 | 3,42E-06 | 2120210 | 0,003  | 6,97E-04 | 3,74E-02 | -0,48 |
| TTC38    | cg00344801 | 22 | 46 685 728  | -0,056 | 3,56E-04 | 1,23E-03 | 2059886 | 0,012  | 9,05E-07 | 2,27E-04 | -0,48 |
| FBLN2    | cg12700904 | 3  | 13 590 720  | 0,069  | 1,25E-11 | 5,26E-10 | 1774602 | -0,011 | 2,16E-19 | 4,36E-15 | -0,48 |
| RUNX3    | cg05656688 | 1  | 25 254 088  | -0,062 | 4,08E-04 | 1,39E-03 | 1787461 | 0,005  | 1,03E-03 | 4,76E-02 | -0,48 |
| RCAN3    | cg11257888 | 1  | 24 828 096  | 0,052  | 2,53E-04 | 9,03E-04 | 1688299 | -0,005 | 6,87E-05 | 6,82E-03 | -0,48 |
| PSMG4    | cg20900927 | 6  | 3 263 650   | 0,060  | 1,24E-10 | 3,30E-09 | 3224204 | -0,006 | 3,49E-06 | 6,74E-04 | -0,48 |
| MAL      | cg09712683 | 2  | 95 692 352  | 0,082  | 4,08E-11 | 1,34E-09 | 2320330 | -0,015 | 2,98E-07 | 9,07E-05 | -0,48 |
| FAIM3    | cg22945467 | 1  | 207 096 833 | 0,061  | 2,48E-11 | 9,00E-10 | 1775542 | -0,012 | 7,00E-08 | 2,92E-05 | -0,48 |
| PTTG1    | cg17367077 | 5  | 159 850 153 | -0,089 | 2,19E-07 | 1,72E-06 | 2042771 | 0,008  | 1,75E-07 | 5,88E-05 | -0,48 |
| RASSF1   | cg24049629 | 3  | 50 376 475  | -0,141 | 1,50E-11 | 6,07E-10 | 1734205 | 0,006  | 1,11E-03 | 4,99E-02 | -0,48 |
| KLRD1    | cg05377120 | 12 | 10 456 885  | -0,068 | 2,46E-03 | 7,10E-03 | 1799134 | 0,011  | 2,14E-04 | 1,63E-02 | -0,48 |
| TGFBR2   | cg07613391 | 3  | 30 708 746  | 0,071  | 1,13E-04 | 4,35E-04 | 2384241 | -0,014 | 2,02E-06 | 4,37E-04 | -0,48 |
| RCAN3    | cg01768001 | 1  | 24 831 147  | 0,054  | 1,94E-07 | 1,54E-06 | 1688299 | -0,005 | 6,87E-05 | 6,82E-03 | -0,48 |
| IFT140   | cg01042641 | 16 | 1 575 979   | 0,063  | 2,72E-08 | 2,95E-07 | 3241657 | -0,007 | 2,82E-07 | 8,79E-05 | -0,47 |
| FBLN2    | cg12700904 | 3  | 13 590 720  | 0,069  | 1,25E-11 | 5,26E-10 | 2390919 | -0,009 | 1,62E-17 | 2,18E-13 | -0,47 |
| FAIM3    | cg23088126 | 1  | 207 078 912 | 0,091  | 2,53E-13 | 3,09E-11 | 1775542 | -0,012 | 7,00E-08 | 2,92E-05 | -0,47 |
| SERPINE2 | cg18681853 | 2  | 224 889 133 | 0,092  | 6,27E-13 | 5,75E-11 | 1655595 | -0,007 | 1,25E-08 | 7,58E-06 | -0,47 |
| GSTM3    | cg00297950 | 1  | 110 282 525 | 0,099  | 9,54E-10 | 1,80E-08 | 1736184 | -0,005 | 1,61E-04 | 1,33E-02 | -0,47 |
| DGKA     | cg15354065 | 12 | 56 327 217  | 0,081  | 7,11E-07 | 4,72E-06 | 2319913 | -0,011 | 3,48E-05 | 4,25E-03 | -0,47 |
| CDK5R1   | cg21855910 | 17 | 30 817 397  | 0,066  | 1,35E-07 | 1,13E-06 | 1730928 | -0,009 | 2,07E-07 | 6,71E-05 | -0,47 |
| MYO15B   | cg08781140 | 17 | 73 584 617  | 0,073  | 2,98E-12 | 1,77E-10 | 3248649 | -0,009 | 2,39E-05 | 3,18E-03 | -0,47 |
| LRRN3    | cg19798735 | 7  | 110 730 805 | 0,088  | 9,44E-11 | 2,66E-09 | 2048591 | -0,009 | 7,67E-11 | 1,11E-07 | -0,47 |
| IFT140   | cg27316811 | 16 | 1 576 146   | 0,077  | 5,13E-06 | 2,69E-05 | 3241657 | -0,007 | 2,82E-07 | 8,79E-05 | -0,47 |
| LTBP3    | cg08965235 | 11 | 65 325 158  | 0,078  | 2,17E-07 | 1,70E-06 | 1805395 | -0,012 | 6,47E-09 | 4,97E-06 | -0,47 |
| GSTM3    | cg23645476 | 1  | 110 282 472 | 0,080  | 1,21E-12 | 9,21E-11 | 1736184 | -0,005 | 1,61E-04 | 1,33E-02 | -0,47 |
| FBLN2    | cg18406197 | 3  | 13 590 450  | 0,063  | 2,01E-10 | 4,92E-09 | 1774602 | -0,011 | 2,16E-19 | 4,36E-15 | -0,47 |
| CDK5R1   | cg21855910 | 17 | 30 817 397  | 0,066  | 1,35E-07 | 1,13E-06 | 2062271 | -0,005 | 3,24E-08 | 1,60E-05 | -0,47 |
| SATB1    | cg26768584 | 3  | 18 480 242  | 0,109  | 2,04E-09 | 3,39E-08 | 1690646 | -0,012 | 1,61E-10 | 2,17E-07 | -0,47 |
| ACTN1    | cg09421468 | 14 | 69 446 784  | 0,060  | 2,52E-07 | 1,93E-06 | 2232177 | -0,017 | 1,94E-07 | 6,35E-05 | -0,47 |
| NUCB2    | cg02075820 | 11 | 17 300 909  | 0,098  | 4,42E-08 | 4,42E-07 | 1655913 | -0,009 | 4,40E-13 | 1,98E-09 | -0,47 |
| PTK7     | cg07235774 | 6  | 43 110 907  | 0,105  | 1,10E-13 | 1,80E-11 | 2353202 | -0,002 | 8,48E-08 | 3,30E-05 | -0,47 |
| CST7     | cg19204859 | 20 | 24 933 798  | -0,064 | 8,54E-07 | 5,53E-06 | 1679826 | 0,011  | 3,22E-05 | 4,06E-03 | -0,47 |
| MCOLN2   | cg12277336 | 1  | 85 458 682  | -0,056 | 1,21E-05 | 5,81E-05 | 1660462 | 0,011  | 4,90E-05 | 5,42E-03 | -0,47 |

|          |            |    |             |        |          |          |         |        |          |          |       |
|----------|------------|----|-------------|--------|----------|----------|---------|--------|----------|----------|-------|
| KCNT1    | cg13473691 | 9  | 138 671 650 | -0,064 | 4,43E-08 | 4,42E-07 | 1702255 | 0,004  | 5,85E-04 | 3,32E-02 | -0,47 |
| FAM102A  | cg13992008 | 9  | 130 739 838 | 0,103  | 3,14E-08 | 3,33E-07 | 2401779 | -0,015 | 1,33E-10 | 1,86E-07 | -0,47 |
| RAPGEF1  | cg13784312 | 9  | 134 609 065 | -0,086 | 2,52E-11 | 9,10E-10 | 1769412 | 0,004  | 9,23E-04 | 4,39E-02 | -0,46 |
| TGFBR2   | cg15171154 | 3  | 30 722 557  | 0,076  | 6,85E-16 | 1,12E-12 | 1726245 | -0,013 | 4,78E-08 | 2,13E-05 | -0,46 |
| TGFBR2   | cg04916416 | 3  | 30 651 317  | 0,073  | 3,24E-05 | 1,40E-04 | 1726245 | -0,013 | 4,78E-08 | 2,13E-05 | -0,46 |
| IL15     | cg11418177 | 4  | 142 636 072 | -0,104 | 4,05E-07 | 2,90E-06 | 1724181 | 0,005  | 1,99E-06 | 4,33E-04 | -0,46 |
| ZCCHC14  | cg16727006 | 16 | 87 470 545  | 0,062  | 1,29E-03 | 3,95E-03 | 1743456 | -0,005 | 1,62E-04 | 1,33E-02 | -0,46 |
| TGFBR2   | cg07285675 | 3  | 30 667 873  | 0,053  | 1,11E-11 | 4,79E-10 | 2384241 | -0,014 | 2,02E-06 | 4,37E-04 | -0,46 |
| RUNX3    | cg12459932 | 1  | 25 292 018  | -0,061 | 1,26E-04 | 4,79E-04 | 1787461 | 0,005  | 1,03E-03 | 4,76E-02 | -0,46 |
| SCRN1    | cg11855325 | 7  | 30 029 717  | 0,089  | 4,21E-10 | 9,09E-09 | 1756439 | -0,008 | 3,11E-07 | 9,34E-05 | -0,46 |
| TGFBR2   | cg07285675 | 3  | 30 667 873  | 0,053  | 1,11E-11 | 4,79E-10 | 1726245 | -0,013 | 4,78E-08 | 2,13E-05 | -0,46 |
| TTC38    | cg08471335 | 22 | 46 685 653  | -0,053 | 2,24E-03 | 6,52E-03 | 2059886 | 0,012  | 9,05E-07 | 2,27E-04 | -0,46 |
| CDK5R1   | cg07437263 | 17 | 30 817 129  | 0,078  | 4,04E-09 | 5,97E-08 | 2062271 | -0,005 | 3,24E-08 | 1,60E-05 | -0,46 |
| CD248    | cg13383058 | 11 | 66 084 660  | 0,062  | 7,78E-10 | 1,52E-08 | 1726589 | -0,012 | 5,95E-15 | 4,81E-11 | -0,46 |
| RCAN2    | cg06665622 | 6  | 46 293 571  | -0,067 | 8,05E-04 | 2,58E-03 | 2120210 | 0,003  | 6,97E-04 | 3,74E-02 | -0,46 |
| RASSF1   | cg01932734 | 3  | 50 376 409  | -0,080 | 4,20E-10 | 9,07E-09 | 1734205 | 0,006  | 1,11E-03 | 4,99E-02 | -0,46 |
| RABGAP1L | cg27299776 | 1  | 174 132 239 | -0,053 | 7,83E-06 | 3,92E-05 | 1708721 | 0,005  | 7,12E-05 | 6,99E-03 | -0,46 |
| PDGFD    | cg23852348 | 11 | 104 030 857 | -0,075 | 2,83E-07 | 2,13E-06 | 1803094 | 0,005  | 4,85E-04 | 2,90E-02 | -0,46 |
| SCRN1    | cg13366537 | 7  | 30 029 754  | 0,058  | 3,31E-07 | 2,44E-06 | 1756439 | -0,008 | 3,11E-07 | 9,34E-05 | -0,46 |
| RAPGEF1  | cg13714407 | 9  | 134 604 212 | -0,103 | 2,45E-05 | 1,09E-04 | 1769412 | 0,004  | 9,23E-04 | 4,39E-02 | -0,45 |
| FAM102A  | cg13805537 | 9  | 130 728 012 | 0,090  | 2,32E-09 | 3,77E-08 | 1745112 | -0,012 | 5,49E-09 | 4,44E-06 | -0,45 |
| PPP2R2B  | cg08991927 | 5  | 146 436 805 | -0,078 | 3,06E-09 | 4,73E-08 | 2360202 | 0,004  | 3,80E-04 | 2,44E-02 | -0,45 |
| RUNX3    | cg23086176 | 1  | 25 226 129  | -0,081 | 6,43E-07 | 4,32E-06 | 1787461 | 0,005  | 1,03E-03 | 4,76E-02 | -0,45 |
| SIK1     | cg17610755 | 21 | 44 845 927  | 0,073  | 7,70E-14 | 1,45E-11 | 1717639 | -0,016 | 2,68E-08 | 1,41E-05 | -0,45 |
| GPR56    | cg03032770 | 16 | 57 669 519  | -0,055 | 1,29E-10 | 3,41E-09 | 2384122 | 0,018  | 5,05E-06 | 9,13E-04 | -0,45 |
| EPHX2    | cg16411256 | 8  | 27 348 931  | 0,061  | 3,53E-09 | 5,33E-08 | 1709237 | -0,013 | 4,60E-11 | 7,16E-08 | -0,45 |
| LTBP3    | cg12282552 | 11 | 65 321 806  | 0,076  | 7,81E-10 | 1,52E-08 | 1805395 | -0,012 | 6,47E-09 | 4,97E-06 | -0,45 |
| ROBO3    | cg24612667 | 11 | 124 735 554 | 0,053  | 2,07E-11 | 7,80E-10 | 1731561 | -0,007 | 8,36E-05 | 7,89E-03 | -0,45 |
| EFHD2    | cg27333269 | 1  | 15 739 283  | -0,050 | 2,38E-06 | 1,36E-05 | 1761463 | 0,007  | 2,95E-04 | 2,03E-02 | -0,45 |
| FGR      | cg11587640 | 1  | 27 959 253  | -0,075 | 5,99E-09 | 8,30E-08 | 1795158 | 0,015  | 2,30E-07 | 7,32E-05 | -0,45 |
| GFI1     | cg04777348 | 1  | 92 952 897  | -0,110 | 6,04E-10 | 1,23E-08 | 1690420 | 0,006  | 2,39E-04 | 1,75E-02 | -0,44 |
| IFT140   | cg27316811 | 16 | 1 576 146   | 0,077  | 5,13E-06 | 2,69E-05 | 1751559 | -0,007 | 1,40E-07 | 5,07E-05 | -0,44 |
| KCNT1    | cg02457319 | 9  | 138 671 108 | -0,077 | 5,85E-08 | 5,59E-07 | 1702255 | 0,004  | 5,85E-04 | 3,32E-02 | -0,44 |
| SATB1    | cg09086987 | 3  | 18 470 432  | 0,076  | 5,44E-08 | 5,26E-07 | 3247857 | -0,007 | 7,00E-09 | 4,97E-06 | -0,44 |
| PPP2R2B  | cg17342759 | 5  | 146 461 855 | -0,050 | 1,22E-07 | 1,04E-06 | 1660732 | 0,010  | 2,02E-04 | 1,57E-02 | -0,44 |
| TGFBR2   | cg07613391 | 3  | 30 708 746  | 0,071  | 1,13E-04 | 4,35E-04 | 1726245 | -0,013 | 4,78E-08 | 2,13E-05 | -0,44 |
| LTBP3    | cg17969560 | 11 | 65 324 768  | 0,065  | 3,65E-08 | 3,77E-07 | 1805395 | -0,012 | 6,47E-09 | 4,97E-06 | -0,44 |
| IFNG     | cg00848007 | 12 | 68 553 396  | -0,069 | 1,82E-03 | 5,40E-03 | 2207291 | 0,019  | 3,03E-07 | 9,16E-05 | -0,44 |
| SCRN1    | cg10113101 | 7  | 30 029 743  | 0,071  | 4,21E-08 | 4,24E-07 | 1756439 | -0,008 | 3,11E-07 | 9,34E-05 | -0,44 |
| SPINT2   | cg17344048 | 19 | 38 756 382  | 0,080  | 3,69E-06 | 2,00E-05 | 1800739 | -0,011 | 3,68E-08 | 1,78E-05 | -0,44 |
| EPHX2    | cg24081819 | 8  | 27 348 940  | 0,054  | 4,45E-09 | 6,47E-08 | 1709237 | -0,013 | 4,60E-11 | 7,16E-08 | -0,44 |
| KCNT1    | cg01841415 | 9  | 138 679 528 | -0,059 | 7,29E-08 | 6,72E-07 | 1702255 | 0,004  | 5,85E-04 | 3,32E-02 | -0,44 |
| CST7     | cg09971811 | 20 | 24 930 099  | -0,125 | 4,90E-12 | 2,56E-10 | 1679826 | 0,011  | 3,22E-05 | 4,06E-03 | -0,44 |

|          |             |    |             |        |          |          |         |        |          |          |       |
|----------|-------------|----|-------------|--------|----------|----------|---------|--------|----------|----------|-------|
| LGALS3BP | cg04927537  | 17 | 76 976 091  | 0,070  | 1,01E-10 | 2,81E-09 | 1659688 | -0,003 | 3,33E-05 | 4,12E-03 | -0,44 |
| ESPN     | cg00158227  | 1  | 6 514 781   | 0,050  | 9,37E-10 | 1,77E-08 | 1765109 | -0,013 | 8,36E-07 | 2,11E-04 | -0,43 |
| RUNX3    | cg15498134  | 1  | 25 246 854  | -0,074 | 5,05E-05 | 2,09E-04 | 1787461 | 0,005  | 1,03E-03 | 4,76E-02 | -0,43 |
| PPFIBP2  | cg23039189  | 11 | 7 534 028   | 0,073  | 1,55E-08 | 1,84E-07 | 1675656 | -0,008 | 7,09E-04 | 3,77E-02 | -0,43 |
| CR2      | cg10993336  | 1  | 207 627 941 | 0,064  | 2,45E-10 | 5,81E-09 | 2369666 | -0,004 | 6,46E-08 | 2,78E-05 | -0,43 |
| PYHIN1   | cg111177526 | 1  | 158 900 384 | -0,057 | 5,13E-04 | 1,71E-03 | 2395981 | 0,009  | 1,56E-06 | 3,51E-04 | -0,43 |
| MAN1C1   | cg10555744  | 1  | 25 946 258  | 0,098  | 5,92E-12 | 2,95E-10 | 1713807 | -0,007 | 4,80E-06 | 8,80E-04 | -0,43 |
| RUNX3    | cg08544331  | 1  | 25 246 922  | -0,085 | 1,24E-05 | 5,91E-05 | 1787461 | 0,005  | 1,03E-03 | 4,76E-02 | -0,43 |
| ADD2     | cg11220663  | 2  | 70 994 863  | 0,051  | 1,92E-08 | 2,20E-07 | 1833858 | -0,008 | 9,29E-10 | 9,90E-07 | -0,43 |
| AKIRIN2  | cg05217213  | 6  | 88 412 782  | -0,066 | 3,67E-06 | 2,00E-05 | 2148847 | 0,008  | 6,21E-05 | 6,43E-03 | -0,43 |
| MAL      | cg09712683  | 2  | 95 692 352  | 0,082  | 4,08E-11 | 1,34E-09 | 2327860 | -0,016 | 3,82E-08 | 1,82E-05 | -0,43 |
| NT5E     | cg23172664  | 6  | 86 169 204  | 0,050  | 1,23E-10 | 3,28E-09 | 1697220 | -0,006 | 1,13E-06 | 2,73E-04 | -0,43 |
| KCNT1    | cg13463516  | 9  | 138 632 121 | -0,067 | 4,49E-08 | 4,47E-07 | 1702255 | 0,004  | 5,85E-04 | 3,32E-02 | -0,43 |
| CDH23    | cg04179740  | 10 | 73 516 760  | 0,084  | 2,81E-05 | 1,23E-04 | 1783149 | -0,010 | 4,44E-08 | 2,04E-05 | -0,43 |
| PIK3IP1  | cg17725019  | 22 | 31 677 931  | 0,083  | 2,01E-13 | 2,65E-11 | 1719986 | -0,009 | 2,21E-06 | 4,73E-04 | -0,43 |
| SIK1     | cg17610755  | 21 | 44 845 927  | 0,073  | 7,70E-14 | 1,45E-11 | 3235647 | -0,011 | 2,44E-06 | 5,03E-04 | -0,43 |
| RASSF1   | cg00980904  | 3  | 50 373 735  | -0,077 | 2,06E-08 | 2,33E-07 | 1734205 | 0,006  | 1,11E-03 | 4,99E-02 | -0,43 |
| SNX29    | cg01366941  | 16 | 12 172 962  | 0,098  | 2,43E-07 | 1,87E-06 | 1659761 | -0,004 | 2,62E-04 | 1,86E-02 | -0,43 |
| GPC2     | cg10084644  | 7  | 99 775 521  | 0,080  | 1,29E-11 | 5,40E-10 | 1651642 | -0,003 | 8,65E-04 | 4,23E-02 | -0,43 |
| CD27     | cg05900140  | 12 | 6 560 162   | 0,063  | 4,13E-08 | 4,17E-07 | 1688959 | -0,014 | 8,39E-09 | 5,66E-06 | -0,43 |
| SATB1    | cg18808261  | 3  | 18 464 935  | 0,089  | 1,33E-06 | 8,17E-06 | 1690646 | -0,012 | 1,61E-10 | 2,17E-07 | -0,42 |
| RUNX3    | cg11585280  | 1  | 25 292 059  | -0,055 | 2,63E-05 | 1,16E-04 | 1787461 | 0,005  | 1,03E-03 | 4,76E-02 | -0,42 |
| SATB1    | cg07108579  | 3  | 18 391 124  | 0,109  | 9,18E-15 | 4,38E-12 | 1690646 | -0,012 | 1,61E-10 | 2,17E-07 | -0,42 |
| KLRD1    | cg05377120  | 12 | 10 456 885  | -0,068 | 2,46E-03 | 7,10E-03 | 1797988 | 0,010  | 2,83E-05 | 3,65E-03 | -0,42 |
| SYTL3    | cg12691330  | 6  | 159 070 656 | -0,100 | 1,66E-07 | 1,35E-06 | 1720623 | 0,009  | 2,69E-06 | 5,47E-04 | -0,42 |
| BCL11B   | cg14150354  | 14 | 99 690 237  | 0,054  | 7,01E-07 | 4,67E-06 | 1665761 | -0,010 | 1,07E-03 | 4,89E-02 | -0,42 |
| GPC2     | cg04778012  | 7  | 99 775 508  | 0,071  | 6,52E-09 | 8,91E-08 | 1651642 | -0,003 | 8,65E-04 | 4,23E-02 | -0,42 |
| TCF7     | cg18338046  | 5  | 133 452 188 | 0,102  | 2,02E-08 | 2,29E-07 | 1676470 | -0,005 | 8,18E-08 | 3,22E-05 | -0,42 |
| PLCG1    | cg24961795  | 20 | 39 769 764  | 0,055  | 1,35E-03 | 4,13E-03 | 2382906 | -0,006 | 8,02E-04 | 4,01E-02 | -0,42 |
| NRCAM    | cg06570167  | 7  | 108 095 719 | 0,057  | 1,09E-09 | 2,01E-08 | 1722809 | -0,008 | 3,07E-16 | 3,11E-12 | -0,42 |
| TCF7     | cg20682563  | 5  | 133 460 874 | 0,075  | 3,72E-08 | 3,83E-07 | 1676470 | -0,005 | 8,18E-08 | 3,22E-05 | -0,42 |
| CHD7     | cg27519392  | 8  | 61 778 137  | 0,058  | 9,78E-07 | 6,23E-06 | 1677376 | -0,006 | 8,96E-05 | 8,34E-03 | -0,42 |
| TCF7     | cg25947408  | 5  | 133 451 383 | 0,058  | 3,40E-05 | 1,46E-04 | 1676470 | -0,005 | 8,18E-08 | 3,22E-05 | -0,42 |
| RNF144A  | cg20437098  | 2  | 7 059 760   | 0,072  | 2,74E-14 | 7,68E-12 | 1900263 | -0,011 | 5,32E-06 | 9,40E-04 | -0,42 |
| TCF7     | cg02387618  | 5  | 133 453 480 | 0,121  | 5,80E-12 | 2,91E-10 | 1676470 | -0,005 | 8,18E-08 | 3,22E-05 | -0,42 |
| SOX13    | cg22346959  | 1  | 204 082 391 | -0,066 | 3,72E-11 | 1,24E-09 | 1683755 | 0,006  | 3,30E-05 | 4,11E-03 | -0,42 |
| LRRN3    | cg06545367  | 7  | 110 731 527 | 0,078  | 2,50E-08 | 2,74E-07 | 2048591 | -0,009 | 7,67E-11 | 1,11E-07 | -0,42 |
| EDARADD  | cg18964582  | 1  | 236 557 182 | -0,052 | 6,59E-09 | 8,99E-08 | 1761820 | 0,009  | 1,79E-05 | 2,58E-03 | -0,42 |
| SYTL3    | cg11065271  | 6  | 159 070 607 | -0,111 | 4,42E-11 | 1,43E-09 | 1720623 | 0,009  | 2,69E-06 | 5,47E-04 | -0,41 |
| SATB1    | cg19818826  | 3  | 18 467 816  | 0,088  | 1,95E-06 | 1,14E-05 | 1690646 | -0,012 | 1,61E-10 | 2,17E-07 | -0,41 |
| SNX29    | cg00459119  | 16 | 12 172 834  | 0,086  | 9,41E-11 | 2,65E-09 | 1659761 | -0,004 | 2,62E-04 | 1,86E-02 | -0,41 |
| SLC22A17 | cg23464698  | 14 | 23 822 265  | 0,059  | 4,25E-09 | 6,23E-08 | 1653200 | -0,005 | 1,16E-07 | 4,27E-05 | -0,41 |
| MMP28    | cg09807148  | 17 | 34 122 069  | 0,051  | 7,31E-09 | 9,81E-08 | 2399016 | -0,007 | 1,02E-12 | 3,74E-09 | -0,41 |

|          |            |    |             |        |          |          |         |        |          |          |       |
|----------|------------|----|-------------|--------|----------|----------|---------|--------|----------|----------|-------|
| NKG7     | cg10126923 | 19 | 51 875 451  | -0,090 | 8,45E-09 | 1,11E-07 | 1682993 | 0,012  | 7,53E-05 | 7,23E-03 | -0,41 |
| RUNX3    | cg16529592 | 1  | 25 292 215  | -0,061 | 3,16E-05 | 1,37E-04 | 1787461 | 0,005  | 1,03E-03 | 4,76E-02 | -0,41 |
| NDRG1    | cg08691775 | 8  | 134 310 658 | -0,057 | 5,40E-04 | 1,80E-03 | 1809931 | 0,006  | 4,49E-05 | 5,08E-03 | -0,41 |
| CDH23    | cg23282441 | 10 | 73 533 927  | 0,061  | 2,20E-05 | 9,91E-05 | 1783149 | -0,010 | 4,44E-08 | 2,04E-05 | -0,41 |
| FBLN2    | cg18406197 | 3  | 13 590 450  | 0,063  | 2,01E-10 | 4,92E-09 | 2390919 | -0,009 | 1,62E-17 | 2,18E-13 | -0,41 |
| GPC2     | cg15140703 | 7  | 99 775 532  | 0,093  | 5,28E-10 | 1,10E-08 | 1651642 | -0,003 | 8,65E-04 | 4,23E-02 | -0,41 |
| ROBO3    | cg09251429 | 11 | 124 735 128 | 0,058  | 1,82E-11 | 7,05E-10 | 1731561 | -0,007 | 8,36E-05 | 7,89E-03 | -0,41 |
| TRIM69   | cg05439368 | 15 | 45 028 098  | -0,106 | 6,84E-12 | 3,29E-10 | 1813430 | 0,003  | 7,89E-05 | 7,53E-03 | -0,41 |
| MAL      | cg10108468 | 2  | 95 719 390  | 0,059  | 5,53E-10 | 1,14E-08 | 2320330 | -0,015 | 2,98E-07 | 9,07E-05 | -0,41 |
| ZNF365   | cg14701867 | 10 | 64 193 068  | -0,055 | 1,62E-07 | 1,32E-06 | 1658094 | 0,004  | 7,38E-05 | 7,17E-03 | -0,41 |
| MCOLN2   | cg01413809 | 1  | 85 462 483  | -0,066 | 4,05E-12 | 2,22E-10 | 1660462 | 0,011  | 4,90E-05 | 5,42E-03 | -0,41 |
| DCHS1    | cg09236382 | 11 | 6 676 366   | 0,073  | 1,33E-10 | 3,50E-09 | 1739640 | -0,003 | 2,57E-08 | 1,38E-05 | -0,41 |
| TGFBR2   | cg15171154 | 3  | 30 722 557  | 0,076  | 6,85E-16 | 1,12E-12 | 2384241 | -0,014 | 2,02E-06 | 4,37E-04 | -0,41 |
| MAL      | cg19762657 | 2  | 95 692 524  | 0,067  | 2,61E-11 | 9,38E-10 | 2327860 | -0,016 | 3,82E-08 | 1,82E-05 | -0,41 |
| ROBO1    | cg07997035 | 3  | 79 816 949  | 0,051  | 1,53E-09 | 2,67E-08 | 1806790 | -0,003 | 4,96E-07 | 1,40E-04 | -0,41 |
| NKG7     | cg04264075 | 19 | 51 876 470  | -0,084 | 5,10E-10 | 1,06E-08 | 1682993 | 0,012  | 7,53E-05 | 7,23E-03 | -0,40 |
| GPC2     | cg18691434 | 7  | 99 775 425  | 0,079  | 7,68E-14 | 1,44E-11 | 1651642 | -0,003 | 8,65E-04 | 4,23E-02 | -0,40 |
| ROBO1    | cg15709235 | 3  | 79 068 292  | 0,089  | 5,39E-15 | 3,20E-12 | 1806790 | -0,003 | 4,96E-07 | 1,40E-04 | -0,40 |
| IGF1R    | cg01631855 | 15 | 99 194 172  | 0,074  | 6,99E-13 | 6,22E-11 | 1744023 | -0,008 | 1,21E-09 | 1,19E-06 | -0,40 |
| SATB1    | cg09086987 | 3  | 18 470 432  | 0,076  | 5,44E-08 | 5,26E-07 | 1690646 | -0,012 | 1,61E-10 | 2,17E-07 | -0,40 |
| PPFIBP2  | cg01842720 | 11 | 7 535 887   | 0,052  | 1,29E-06 | 7,93E-06 | 1675656 | -0,008 | 7,09E-04 | 3,77E-02 | -0,40 |
| PDE9A    | cg08729135 | 21 | 44 073 555  | 0,052  | 5,44E-08 | 5,26E-07 | 1683063 | -0,004 | 3,02E-06 | 6,05E-04 | -0,40 |
| KLHL29   | cg11227278 | 2  | 23 749 277  | 0,076  | 7,68E-08 | 7,02E-07 | 3178406 | -0,004 | 2,58E-05 | 3,36E-03 | -0,40 |
| PPP2R2B  | cg17342759 | 5  | 146 461 855 | -0,050 | 1,22E-07 | 1,04E-06 | 2360202 | 0,004  | 3,80E-04 | 2,44E-02 | -0,40 |
| TRAF3IP2 | cg15931839 | 6  | 111 880 530 | 0,091  | 6,84E-16 | 1,12E-12 | 1701514 | -0,007 | 1,50E-05 | 2,21E-03 | -0,40 |
| ROBO3    | cg15221604 | 11 | 124 738 735 | 0,112  | 1,07E-12 | 8,38E-11 | 1731561 | -0,007 | 8,36E-05 | 7,89E-03 | -0,40 |
| ESPN     | cg03397716 | 1  | 6 484 980   | 0,068  | 1,40E-12 | 1,02E-10 | 1765109 | -0,013 | 8,36E-07 | 2,11E-04 | -0,40 |
| MYO15B   | cg06390536 | 17 | 73 584 068  | 0,063  | 1,32E-11 | 5,47E-10 | 3248649 | -0,009 | 2,39E-05 | 3,18E-03 | -0,40 |
| ESPN     | cg12406391 | 1  | 6 520 194   | 0,091  | 3,27E-09 | 5,01E-08 | 1765109 | -0,013 | 8,36E-07 | 2,11E-04 | -0,40 |
| SCRN1    | cg06133110 | 7  | 30 028 307  | 0,070  | 8,36E-06 | 4,16E-05 | 1756439 | -0,008 | 3,11E-07 | 9,34E-05 | -0,40 |
| PTTG1    | cg26775866 | 5  | 159 849 193 | -0,150 | 2,93E-16 | 6,94E-13 | 2042771 | 0,008  | 1,75E-07 | 5,88E-05 | -0,39 |
| SCRN1    | cg10589443 | 7  | 30 028 281  | 0,059  | 4,01E-05 | 1,70E-04 | 1756439 | -0,008 | 3,11E-07 | 9,34E-05 | -0,39 |
| ESPN     | cg26815404 | 1  | 6 500 700   | 0,064  | 2,13E-10 | 5,17E-09 | 1765109 | -0,013 | 8,36E-07 | 2,11E-04 | -0,39 |
| MATK     | cg13387994 | 19 | 3 786 957   | -0,061 | 1,89E-07 | 1,51E-06 | 2319000 | 0,009  | 2,00E-04 | 1,56E-02 | -0,39 |
| CLDND2   | cg12011479 | 19 | 51 873 045  | -0,056 | 2,18E-05 | 9,82E-05 | 2077680 | 0,013  | 3,62E-07 | 1,07E-04 | -0,39 |
| SATB1    | cg21902966 | 3  | 18 391 029  | 0,104  | 9,48E-15 | 4,42E-12 | 3247857 | -0,007 | 7,00E-09 | 4,97E-06 | -0,39 |
| PPP2R2B  | cg19494588 | 5  | 146 195 103 | -0,085 | 7,88E-07 | 5,16E-06 | 2360202 | 0,004  | 3,80E-04 | 2,44E-02 | -0,39 |
| SPEG     | cg02323356 | 2  | 220 313 153 | 0,074  | 3,02E-14 | 8,15E-12 | 1740052 | -0,003 | 6,40E-05 | 6,51E-03 | -0,39 |
| ENTPD3   | cg10755058 | 3  | 40 428 713  | 0,083  | 2,71E-10 | 6,30E-09 | 1775114 | -0,002 | 3,76E-04 | 2,42E-02 | -0,39 |
| FAM179A  | cg05707236 | 2  | 29 204 695  | -0,062 | 6,27E-08 | 5,93E-07 | 3247182 | 0,008  | 3,19E-04 | 2,15E-02 | -0,39 |
| MAL      | cg03129884 | 2  | 95 692 727  | 0,065  | 1,23E-10 | 3,29E-09 | 2320330 | -0,015 | 2,98E-07 | 9,07E-05 | -0,39 |
| ACTN1    | cg08170227 | 14 | 69 422 517  | 0,055  | 2,43E-09 | 3,92E-08 | 2232177 | -0,017 | 1,94E-07 | 6,35E-05 | -0,39 |
| TGFBR2   | cg13724812 | 3  | 30 689 835  | 0,106  | 1,02E-10 | 2,83E-09 | 1726245 | -0,013 | 4,78E-08 | 2,13E-05 | -0,39 |

|          |            |    |             |        |          |          |         |        |          |          |       |
|----------|------------|----|-------------|--------|----------|----------|---------|--------|----------|----------|-------|
| ROBO1    | cg19258784 | 3  | 79 067 596  | 0,081  | 8,60E-14 | 1,54E-11 | 1806790 | -0,003 | 4,96E-07 | 1,40E-04 | -0,39 |
| FAM134B  | cg00461022 | 5  | 16 618 052  | 0,115  | 1,18E-13 | 1,88E-11 | 1811330 | -0,004 | 3,52E-06 | 6,76E-04 | -0,39 |
| DTHD1    | cg00682487 | 4  | 36 283 275  | -0,073 | 3,97E-04 | 1,36E-03 | 1765773 | 0,007  | 1,43E-06 | 3,31E-04 | -0,38 |
| FGR      | cg11587640 | 1  | 27 959 253  | -0,075 | 5,99E-09 | 8,30E-08 | 2368318 | 0,017  | 8,84E-08 | 3,41E-05 | -0,38 |
| PDGFRB   | cg26247309 | 5  | 149 501 835 | -0,079 | 5,11E-11 | 1,61E-09 | 1815057 | 0,006  | 9,48E-05 | 8,74E-03 | -0,38 |
| ESPN     | cg17430636 | 1  | 6 500 410   | 0,053  | 7,92E-11 | 2,30E-09 | 1765109 | -0,013 | 8,36E-07 | 2,11E-04 | -0,38 |
| OSBPL5   | cg06131936 | 11 | 3 187 271   | -0,100 | 2,87E-10 | 6,61E-09 | 1802151 | 0,008  | 8,45E-04 | 4,16E-02 | -0,38 |
| ZNF263   | cg05622324 | 16 | 3 334 135   | 0,067  | 4,04E-08 | 4,10E-07 | 1692620 | -0,005 | 4,13E-04 | 2,57E-02 | -0,38 |
| RAPGEF1  | cg07285276 | 9  | 134 613 015 | -0,072 | 4,67E-08 | 4,62E-07 | 1769412 | 0,004  | 9,23E-04 | 4,39E-02 | -0,38 |
| BCL11B   | cg23479730 | 14 | 99 681 757  | 0,088  | 3,91E-10 | 8,55E-09 | 1665761 | -0,010 | 1,07E-03 | 4,89E-02 | -0,38 |
| OSBPL5   | cg11219178 | 11 | 3 120 949   | -0,051 | 1,44E-06 | 8,72E-06 | 2307032 | 0,009  | 2,71E-05 | 3,52E-03 | -0,38 |
| ALOX5AP  | cg02982610 | 13 | 31 309 403  | -0,069 | 5,50E-07 | 3,77E-06 | 1797875 | 0,008  | 7,96E-04 | 4,00E-02 | -0,38 |
| NRCAM    | cg09561125 | 7  | 108 097 477 | 0,066  | 1,89E-07 | 1,51E-06 | 1722809 | -0,008 | 3,07E-16 | 3,11E-12 | -0,38 |
| FLNB     | cg12194336 | 3  | 58 067 906  | 0,082  | 8,19E-10 | 1,58E-08 | 1664922 | -0,013 | 3,39E-12 | 9,15E-09 | -0,38 |
| CR2      | cg04439623 | 1  | 207 627 601 | 0,055  | 2,37E-08 | 2,62E-07 | 2369666 | -0,004 | 6,46E-08 | 2,78E-05 | -0,38 |
| DIP2B    | cg05512157 | 12 | 50 901 878  | 0,085  | 6,89E-08 | 6,42E-07 | 2180352 | -0,009 | 6,12E-05 | 6,40E-03 | -0,38 |
| IGF1R    | cg03795574 | 15 | 99 256 874  | 0,062  | 1,24E-08 | 1,52E-07 | 1744023 | -0,008 | 1,21E-09 | 1,19E-06 | -0,38 |
| ROBO3    | cg10680051 | 11 | 124 735 089 | 0,086  | 3,95E-12 | 2,18E-10 | 1731561 | -0,007 | 8,36E-05 | 7,89E-03 | -0,38 |
| GFI1     | cg04955573 | 1  | 92 944 306  | -0,092 | 1,55E-08 | 1,84E-07 | 1690420 | 0,006  | 2,39E-04 | 1,75E-02 | -0,38 |
| IFNG     | cg26227465 | 12 | 68 553 577  | -0,087 | 2,40E-04 | 8,59E-04 | 2207291 | 0,019  | 3,03E-07 | 9,16E-05 | -0,38 |
| MMP28    | cg12700449 | 17 | 34 121 837  | 0,073  | 8,55E-10 | 1,64E-08 | 2399016 | -0,007 | 1,02E-12 | 3,74E-09 | -0,38 |
| TRAF3IP2 | cg15772366 | 6  | 111 926 749 | 0,109  | 2,64E-07 | 2,01E-06 | 1701514 | -0,007 | 1,50E-05 | 2,21E-03 | -0,38 |
| FAM179A  | cg16944977 | 2  | 29 203 230  | -0,068 | 6,02E-08 | 5,73E-07 | 3247182 | 0,008  | 3,19E-04 | 2,15E-02 | -0,37 |
| SPEG     | cg12213062 | 2  | 220 299 653 | 0,087  | 6,88E-11 | 2,05E-09 | 1740052 | -0,003 | 6,40E-05 | 6,51E-03 | -0,37 |
| ZCCHC14  | cg10375267 | 16 | 87 523 700  | 0,100  | 4,32E-12 | 2,33E-10 | 1743456 | -0,005 | 1,62E-04 | 1,33E-02 | -0,37 |
| DEAF1    | cg21156386 | 11 | 692 983     | 0,093  | 3,16E-11 | 1,09E-09 | 1689868 | -0,003 | 7,11E-04 | 3,78E-02 | -0,37 |
| GPC2     | cg13210467 | 7  | 99 775 443  | 0,074  | 7,49E-14 | 1,42E-11 | 1651642 | -0,003 | 8,65E-04 | 4,23E-02 | -0,37 |
| DGKA     | cg10782923 | 12 | 56 329 731  | 0,092  | 2,76E-10 | 6,40E-09 | 2319910 | -0,011 | 1,83E-05 | 2,62E-03 | -0,37 |
| MAN1C1   | cg09027133 | 1  | 25 945 042  | 0,055  | 8,27E-08 | 7,47E-07 | 1713807 | -0,007 | 4,80E-06 | 8,80E-04 | -0,37 |
| MAL      | cg03129884 | 2  | 95 692 727  | 0,065  | 1,23E-10 | 3,29E-09 | 2327860 | -0,016 | 3,82E-08 | 1,82E-05 | -0,37 |
| BCL11B   | cg02963266 | 14 | 99 681 710  | 0,136  | 4,95E-14 | 1,10E-11 | 1665761 | -0,010 | 1,07E-03 | 4,89E-02 | -0,37 |
| IGF1R    | cg13297560 | 15 | 99 320 054  | 0,095  | 5,97E-12 | 2,97E-10 | 1744023 | -0,008 | 1,21E-09 | 1,19E-06 | -0,37 |
| DHRS3    | cg13314614 | 1  | 12 655 992  | 0,054  | 3,50E-08 | 3,64E-07 | 1752478 | -0,007 | 5,49E-04 | 3,17E-02 | -0,37 |
| ID3      | cg25287482 | 1  | 23 884 847  | 0,067  | 1,20E-09 | 2,18E-08 | 1732296 | -0,008 | 2,48E-06 | 5,07E-04 | -0,37 |
| IGF1R    | cg08729686 | 15 | 99 194 624  | 0,087  | 1,27E-10 | 3,36E-09 | 1744023 | -0,008 | 1,21E-09 | 1,19E-06 | -0,37 |
| TCF7     | cg15413523 | 5  | 133 451 625 | 0,057  | 6,83E-07 | 4,55E-06 | 1676470 | -0,005 | 8,18E-08 | 3,22E-05 | -0,37 |
| TRAF3IP2 | cg21699035 | 6  | 111 926 911 | 0,069  | 1,72E-07 | 1,39E-06 | 1701514 | -0,007 | 1,50E-05 | 2,21E-03 | -0,37 |
| PDGFRB   | cg14051336 | 5  | 149 515 317 | -0,054 | 1,39E-08 | 1,68E-07 | 1815057 | 0,006  | 9,48E-05 | 8,74E-03 | -0,37 |
| ACTN1    | cg00739471 | 14 | 69 415 588  | 0,122  | 3,30E-15 | 2,44E-12 | 2232177 | -0,017 | 1,94E-07 | 6,35E-05 | -0,37 |
| RABGAP1L | cg07476963 | 1  | 174 127 462 | -0,078 | 2,97E-09 | 4,62E-08 | 1708721 | 0,005  | 7,12E-05 | 6,99E-03 | -0,37 |
| GFI1     | cg25320328 | 1  | 92 953 037  | -0,124 | 5,36E-11 | 1,67E-09 | 1690420 | 0,006  | 2,39E-04 | 1,75E-02 | -0,37 |
| ROBO1    | cg24784794 | 3  | 79 068 831  | 0,060  | 2,37E-09 | 3,83E-08 | 1806790 | -0,003 | 4,96E-07 | 1,40E-04 | -0,37 |
| DGKA     | cg10782923 | 12 | 56 329 731  | 0,092  | 2,76E-10 | 6,40E-09 | 2319913 | -0,011 | 3,48E-05 | 4,25E-03 | -0,37 |



|          |            |    |             |        |          |          |         |        |          |          |       |
|----------|------------|----|-------------|--------|----------|----------|---------|--------|----------|----------|-------|
| DTHD1    | cg21010701 | 4  | 36 283 195  | -0,065 | 6,80E-04 | 2,21E-03 | 1765773 | 0,007  | 1,43E-06 | 3,31E-04 | -0,37 |
| ARHGEF4  | cg23415434 | 2  | 131 798 869 | 0,061  | 9,60E-09 | 1,23E-07 | 1666076 | -0,002 | 1,85E-05 | 2,63E-03 | -0,36 |
| GSTP1    | cg22224704 | 11 | 67 352 041  | -0,061 | 4,49E-09 | 6,52E-08 | 1679809 | 0,006  | 1,67E-04 | 1,34E-02 | -0,36 |
| MAN1C1   | cg16836311 | 1  | 25 944 712  | 0,091  | 6,33E-08 | 5,98E-07 | 1713807 | -0,007 | 4,80E-06 | 8,80E-04 | -0,36 |
| RCAN3    | cg15519096 | 1  | 24 833 311  | 0,081  | 3,00E-04 | 1,05E-03 | 1688299 | -0,005 | 6,87E-05 | 6,82E-03 | -0,36 |
| LGALS3BP | cg25178683 | 17 | 76 976 267  | 0,062  | 7,36E-11 | 2,16E-09 | 1659688 | -0,003 | 3,33E-05 | 4,12E-03 | -0,36 |
| BZW2     | cg03976645 | 7  | 16 724 981  | 0,082  | 7,17E-10 | 1,42E-08 | 1676548 | -0,011 | 2,82E-08 | 1,46E-05 | -0,36 |
| FBXO15   | cg25740500 | 18 | 71 749 983  | 0,051  | 3,14E-11 | 1,09E-09 | 1755281 | -0,003 | 5,89E-08 | 2,57E-05 | -0,36 |
| CDK5R1   | cg19634527 | 17 | 30 814 814  | 0,095  | 3,81E-08 | 3,91E-07 | 2062271 | -0,005 | 3,24E-08 | 1,60E-05 | -0,36 |
| BCL11B   | cg10178917 | 14 | 99 665 210  | 0,070  | 4,46E-12 | 2,39E-10 | 1665761 | -0,010 | 1,07E-03 | 4,89E-02 | -0,36 |
| TRIM69   | cg22107533 | 15 | 45 028 083  | -0,087 | 6,66E-12 | 3,22E-10 | 1813430 | 0,003  | 7,89E-05 | 7,53E-03 | -0,36 |
| FAM179A  | cg23167594 | 2  | 29 204 200  | -0,059 | 3,42E-07 | 2,51E-06 | 3247182 | 0,008  | 3,19E-04 | 2,15E-02 | -0,36 |
| GPC2     | cg00553149 | 7  | 99 775 558  | 0,062  | 1,34E-07 | 1,13E-06 | 1651642 | -0,003 | 8,65E-04 | 4,23E-02 | -0,36 |
| LILRB1   | cg05365532 | 19 | 55 128 350  | -0,106 | 4,33E-09 | 6,33E-08 | 1708248 | 0,002  | 2,52E-04 | 1,80E-02 | -0,36 |
| ZNF256   | cg13359948 | 19 | 58 458 769  | 0,056  | 1,14E-09 | 2,08E-08 | 1757408 | -0,009 | 5,63E-07 | 1,54E-04 | -0,36 |
| IFT140   | cg07013955 | 16 | 1 595 532   | 0,084  | 6,91E-07 | 4,60E-06 | 1751559 | -0,007 | 1,40E-07 | 5,07E-05 | -0,36 |
| PTTG1    | cg23024444 | 5  | 159 848 299 | -0,067 | 1,39E-06 | 8,48E-06 | 2042771 | 0,008  | 1,75E-07 | 5,88E-05 | -0,36 |
| GAS7     | cg26999423 | 17 | 10 017 891  | -0,059 | 5,06E-08 | 4,94E-07 | 1745994 | 0,007  | 3,68E-04 | 2,38E-02 | -0,36 |
| DGKA     | cg25416125 | 12 | 56 329 615  | 0,085  | 3,71E-10 | 8,18E-09 | 2319913 | -0,011 | 3,48E-05 | 4,25E-03 | -0,36 |
| SATB1    | cg21902966 | 3  | 18 391 029  | 0,104  | 9,48E-15 | 4,42E-12 | 1690646 | -0,012 | 1,61E-10 | 2,17E-07 | -0,36 |
| SREBF1   | cg08129017 | 17 | 17 728 660  | 0,067  | 8,79E-06 | 4,35E-05 | 1663035 | -0,010 | 4,98E-07 | 1,40E-04 | -0,36 |
| GFI1     | cg24517501 | 1  | 92 952 702  | -0,104 | 6,50E-11 | 1,96E-09 | 1690420 | 0,006  | 2,39E-04 | 1,75E-02 | -0,36 |
| OPRM1    | cg03081675 | 6  | 154 540 097 | 0,099  | 2,04E-10 | 4,99E-09 | 1796497 | -0,005 | 6,53E-04 | 3,58E-02 | -0,36 |
| RASSF4   | cg11753018 | 10 | 45 469 396  | -0,089 | 8,05E-10 | 1,56E-08 | 1690566 | 0,004  | 2,98E-05 | 3,81E-03 | -0,36 |
| SLC22A17 | cg17199325 | 14 | 23 821 229  | 0,052  | 3,44E-06 | 1,89E-05 | 1653200 | -0,005 | 1,16E-07 | 4,27E-05 | -0,36 |
| SLC4A4   | cg00650386 | 4  | 72 248 830  | -0,063 | 6,35E-09 | 8,72E-08 | 1734897 | 0,003  | 2,22E-04 | 1,68E-02 | -0,36 |
| PLEK     | cg13468685 | 2  | 68 592 737  | -0,109 | 5,41E-11 | 1,68E-09 | 1795762 | 0,013  | 1,19E-04 | 1,05E-02 | -0,35 |
| S100A10  | cg26230275 | 1  | 151 965 283 | -0,067 | 5,54E-09 | 7,77E-08 | 2046730 | 0,006  | 1,66E-04 | 1,34E-02 | -0,35 |
| HOOK1    | cg21577889 | 1  | 60 281 077  | 0,059  | 9,58E-11 | 2,69E-09 | 1741406 | -0,004 | 4,11E-04 | 2,56E-02 | -0,35 |
| CLDND2   | cg14496375 | 19 | 51 872 365  | -0,075 | 1,98E-04 | 7,22E-04 | 2077680 | 0,013  | 3,62E-07 | 1,07E-04 | -0,35 |
| SNX29    | cg00459119 | 16 | 12 172 834  | 0,086  | 9,41E-11 | 2,65E-09 | 1670539 | -0,007 | 4,15E-04 | 2,58E-02 | -0,35 |
| ROBO1    | cg08661007 | 3  | 79 817 232  | 0,075  | 1,59E-10 | 4,05E-09 | 1806790 | -0,003 | 4,96E-07 | 1,40E-04 | -0,35 |
| IFNG     | cg05224770 | 12 | 68 553 819  | -0,056 | 8,13E-03 | 2,07E-02 | 2207291 | 0,019  | 3,03E-07 | 9,16E-05 | -0,35 |
| IGF1R    | cg07779120 | 15 | 99 194 021  | 0,065  | 5,53E-10 | 1,14E-08 | 1744023 | -0,008 | 1,21E-09 | 1,19E-06 | -0,35 |
| MAN1C1   | cg04116354 | 1  | 26 003 643  | 0,070  | 1,67E-09 | 2,87E-08 | 1713807 | -0,007 | 4,80E-06 | 8,80E-04 | -0,35 |
| MAL      | cg10108468 | 2  | 95 719 390  | 0,059  | 5,53E-10 | 1,14E-08 | 2327860 | -0,016 | 3,82E-08 | 1,82E-05 | -0,35 |
| RGS10    | cg05241536 | 10 | 121 298 236 | 0,077  | 1,49E-09 | 2,60E-08 | 1733538 | -0,011 | 2,26E-11 | 3,92E-08 | -0,35 |
| TBC1D4   | cg21949157 | 13 | 76 054 909  | 0,067  | 4,43E-09 | 6,46E-08 | 1688098 | -0,010 | 1,95E-07 | 6,35E-05 | -0,35 |
| DOK2     | cg08288130 | 8  | 21 771 540  | -0,067 | 2,02E-10 | 4,95E-09 | 1791211 | 0,008  | 2,27E-04 | 1,70E-02 | -0,35 |
| OSBPL5   | cg11219178 | 11 | 3 120 949   | -0,051 | 1,44E-06 | 8,72E-06 | 1802151 | 0,008  | 8,45E-04 | 4,16E-02 | -0,35 |
| GDPD5    | cg01522592 | 11 | 75 235 311  | -0,055 | 8,47E-06 | 4,21E-05 | 1701643 | 0,010  | 1,54E-04 | 1,28E-02 | -0,35 |
| NT5E     | cg27039625 | 6  | 86 159 096  | 0,094  | 2,71E-13 | 3,24E-11 | 1697220 | -0,006 | 1,13E-06 | 2,73E-04 | -0,35 |
| SPEG     | cg15634877 | 2  | 220 299 643 | 0,071  | 2,64E-10 | 6,17E-09 | 1740052 | -0,003 | 6,40E-05 | 6,51E-03 | -0,35 |

|         |            |    |             |        |          |          |         |        |          |          |       |
|---------|------------|----|-------------|--------|----------|----------|---------|--------|----------|----------|-------|
| KCNT1   | cg14341131 | 9  | 138 605 049 | -0,058 | 9,87E-07 | 6,27E-06 | 1702255 | 0,004  | 5,85E-04 | 3,32E-02 | -0,35 |
| PDGFD   | cg04420335 | 11 | 103 800 408 | -0,075 | 4,87E-09 | 7,00E-08 | 2376859 | 0,003  | 5,46E-04 | 3,16E-02 | -0,35 |
| CDH23   | cg08293528 | 10 | 73 565 688  | 0,053  | 3,71E-09 | 5,56E-08 | 1783149 | -0,010 | 4,44E-08 | 2,04E-05 | -0,34 |
| ALDH3B1 | cg05620821 | 11 | 67 777 618  | -0,058 | 1,71E-08 | 2,00E-07 | 1728662 | 0,003  | 9,38E-04 | 4,44E-02 | -0,34 |
| CNST    | cg11812748 | 1  | 246 733 057 | 0,067  | 1,12E-08 | 1,40E-07 | 1670263 | -0,008 | 6,17E-05 | 6,42E-03 | -0,34 |
| APBA2   | cg21917349 | 15 | 29 213 860  | 0,058  | 1,32E-03 | 4,04E-03 | 1723626 | -0,010 | 4,50E-10 | 5,35E-07 | -0,34 |
| SNX29   | cg01366941 | 16 | 12 172 962  | 0,098  | 2,43E-07 | 1,87E-06 | 1670539 | -0,007 | 4,15E-04 | 2,58E-02 | -0,34 |
| DGKA    | cg07679948 | 12 | 56 329 641  | 0,115  | 2,33E-10 | 5,57E-09 | 2319913 | -0,011 | 3,48E-05 | 4,25E-03 | -0,34 |
| KLHL29  | cg21206147 | 2  | 23 749 087  | 0,072  | 1,15E-05 | 5,55E-05 | 3178406 | -0,004 | 2,58E-05 | 3,36E-03 | -0,34 |
| ROBO3   | cg08522176 | 11 | 124 735 398 | 0,057  | 4,35E-10 | 9,35E-09 | 1731561 | -0,007 | 8,36E-05 | 7,89E-03 | -0,34 |
| SLC4A4  | cg19850370 | 4  | 72 205 104  | -0,059 | 9,32E-06 | 4,58E-05 | 1734897 | 0,003  | 2,22E-04 | 1,68E-02 | -0,34 |
| TMEM87A | cg23983173 | 15 | 42 564 634  | -0,058 | 2,91E-08 | 3,12E-07 | 1716816 | 0,004  | 8,44E-04 | 4,16E-02 | -0,34 |
| ROBO1   | cg04562217 | 3  | 79 815 718  | 0,084  | 7,41E-11 | 2,18E-09 | 1806790 | -0,003 | 4,96E-07 | 1,40E-04 | -0,34 |
| ROBO1   | cg11980129 | 3  | 79 815 639  | 0,071  | 1,49E-09 | 2,61E-08 | 1806790 | -0,003 | 4,96E-07 | 1,40E-04 | -0,34 |
| PTK7    | cg25033767 | 6  | 43 044 876  | 0,058  | 1,55E-09 | 2,69E-08 | 2353202 | -0,002 | 8,48E-08 | 3,30E-05 | -0,34 |
| FBLN2   | cg25120326 | 3  | 13 591 084  | 0,058  | 2,72E-07 | 2,06E-06 | 1774602 | -0,011 | 2,16E-19 | 4,36E-15 | -0,34 |
| CITED4  | cg13150171 | 1  | 41 326 892  | 0,067  | 4,44E-10 | 9,50E-09 | 1787691 | -0,007 | 2,59E-08 | 1,38E-05 | -0,34 |
| DGKA    | cg07679948 | 12 | 56 329 641  | 0,115  | 2,33E-10 | 5,57E-09 | 2319910 | -0,011 | 1,83E-05 | 2,62E-03 | -0,34 |
| PTK7    | cg21663580 | 6  | 43 044 771  | 0,065  | 3,65E-08 | 3,77E-07 | 2353202 | -0,002 | 8,48E-08 | 3,30E-05 | -0,34 |
| GPC2    | cg00048759 | 7  | 99 775 422  | 0,066  | 3,60E-14 | 8,99E-12 | 1651642 | -0,003 | 8,65E-04 | 4,23E-02 | -0,34 |
| DGKA    | cg06915826 | 12 | 56 329 903  | 0,112  | 1,24E-11 | 5,23E-10 | 2319913 | -0,011 | 3,48E-05 | 4,25E-03 | -0,34 |
| DHRS3   | cg06641388 | 1  | 12 655 240  | 0,051  | 3,76E-12 | 2,10E-10 | 1752478 | -0,007 | 5,49E-04 | 3,17E-02 | -0,34 |
| TMIGD2  | cg11980819 | 19 | 4 302 579   | 0,058  | 3,31E-08 | 3,48E-07 | 2160577 | -0,004 | 8,06E-07 | 2,06E-04 | -0,34 |
| DGKA    | cg06915826 | 12 | 56 329 903  | 0,112  | 1,24E-11 | 5,23E-10 | 2319910 | -0,011 | 1,83E-05 | 2,62E-03 | -0,34 |
| ITGA6   | cg10155853 | 2  | 173 293 328 | 0,069  | 3,22E-10 | 7,27E-09 | 2359287 | -0,009 | 2,67E-07 | 8,37E-05 | -0,34 |
| ALDH5A1 | cg25375764 | 6  | 24 494 665  | 0,051  | 2,93E-08 | 3,14E-07 | 2372398 | -0,004 | 6,13E-06 | 1,06E-03 | -0,34 |
| ESPN    | cg26419880 | 1  | 6 515 624   | 0,074  | 7,46E-12 | 3,52E-10 | 1765109 | -0,013 | 8,36E-07 | 2,11E-04 | -0,34 |
| SPEG    | cg02487130 | 2  | 220 349 733 | 0,069  | 1,53E-12 | 1,09E-10 | 1740052 | -0,003 | 6,40E-05 | 6,51E-03 | -0,34 |
| DGKA    | cg25416125 | 12 | 56 329 615  | 0,085  | 3,71E-10 | 8,18E-09 | 2319910 | -0,011 | 1,83E-05 | 2,62E-03 | -0,34 |
| GFI1    | cg23624705 | 1  | 92 952 655  | -0,118 | 6,64E-12 | 3,22E-10 | 1690420 | 0,006  | 2,39E-04 | 1,75E-02 | -0,34 |
| RCAN3   | cg17854320 | 1  | 24 829 245  | 0,070  | 1,50E-12 | 1,07E-10 | 1688299 | -0,005 | 6,87E-05 | 6,82E-03 | -0,34 |
| CRLF1   | cg13407975 | 19 | 18 705 946  | 0,099  | 1,32E-10 | 3,47E-09 | 2368576 | -0,007 | 1,87E-05 | 2,64E-03 | -0,34 |
| LRRC16A | cg21668832 | 6  | 25 278 956  | 0,057  | 4,69E-06 | 2,48E-05 | 3244461 | -0,002 | 2,33E-04 | 1,72E-02 | -0,33 |
| ID3     | cg02343604 | 1  | 23 884 703  | 0,093  | 1,94E-13 | 2,59E-11 | 1732296 | -0,008 | 2,48E-06 | 5,07E-04 | -0,33 |
| SERINC5 | cg02417427 | 5  | 79 479 211  | 0,060  | 4,56E-05 | 1,91E-04 | 1789464 | -0,008 | 1,20E-07 | 4,38E-05 | -0,33 |
| GFI1    | cg20125091 | 1  | 92 952 641  | -0,051 | 2,77E-07 | 2,10E-06 | 1690420 | 0,006  | 2,39E-04 | 1,75E-02 | -0,33 |
| PDGFD   | cg23852348 | 11 | 104 030 857 | -0,075 | 2,83E-07 | 2,13E-06 | 2376859 | 0,003  | 5,46E-04 | 3,16E-02 | -0,33 |
| EDARADD | cg09809672 | 1  | 236 557 682 | -0,076 | 1,82E-08 | 2,10E-07 | 1761820 | 0,009  | 1,79E-05 | 2,58E-03 | -0,33 |
| ZNF75A  | cg07949597 | 16 | 3 355 079   | 0,056  | 3,05E-08 | 3,24E-07 | 3186390 | -0,006 | 5,90E-04 | 3,34E-02 | -0,33 |
| HOOK1   | cg23996071 | 1  | 60 280 809  | 0,069  | 2,30E-10 | 5,51E-09 | 1741406 | -0,004 | 4,11E-04 | 2,56E-02 | -0,33 |
| LIMK2   | cg01606027 | 22 | 31 607 212  | -0,058 | 2,82E-05 | 1,24E-04 | 2367671 | 0,001  | 5,87E-04 | 3,32E-02 | -0,33 |
| GAS7    | cg22541400 | 17 | 9 840 728   | -0,059 | 4,59E-08 | 4,56E-07 | 1745994 | 0,007  | 3,68E-04 | 2,38E-02 | -0,33 |
| LTK     | cg25298161 | 15 | 41 806 135  | 0,058  | 4,99E-11 | 1,58E-09 | 1679290 | -0,005 | 4,55E-05 | 5,11E-03 | -0,32 |

|          |            |    |             |        |          |          |         |        |          |          |       |
|----------|------------|----|-------------|--------|----------|----------|---------|--------|----------|----------|-------|
| KLHL29   | cg15123692 | 2  | 23 886 357  | 0,072  | 3,37E-12 | 1,94E-10 | 3178406 | -0,004 | 2,58E-05 | 3,36E-03 | -0,32 |
| LILRB1   | cg01720520 | 19 | 55 127 892  | -0,060 | 1,49E-07 | 1,23E-06 | 1708248 | 0,002  | 2,52E-04 | 1,80E-02 | -0,32 |
| MAN1C1   | cg16585234 | 1  | 25 944 802  | 0,072  | 2,94E-07 | 2,20E-06 | 1713807 | -0,007 | 4,80E-06 | 8,80E-04 | -0,32 |
| DOK2     | cg15316716 | 8  | 21 769 797  | -0,060 | 6,76E-04 | 2,20E-03 | 1791211 | 0,008  | 2,27E-04 | 1,70E-02 | -0,32 |
| OXNAD1   | cg22230912 | 3  | 16 331 335  | 0,072  | 1,27E-06 | 7,81E-06 | 3244030 | -0,003 | 2,89E-04 | 2,00E-02 | -0,32 |
| ITGA6    | cg19134705 | 2  | 173 293 182 | 0,062  | 5,14E-09 | 7,31E-08 | 2359287 | -0,009 | 2,67E-07 | 8,37E-05 | -0,32 |
| LTK      | cg07621749 | 15 | 41 806 141  | 0,053  | 2,50E-10 | 5,91E-09 | 1679290 | -0,005 | 4,55E-05 | 5,11E-03 | -0,32 |
| ESPN     | cg10210806 | 1  | 6 514 605   | 0,055  | 2,35E-06 | 1,35E-05 | 1765109 | -0,013 | 8,36E-07 | 2,11E-04 | -0,32 |
| ADAP1    | cg18664596 | 7  | 947 151     | -0,052 | 1,10E-06 | 6,88E-06 | 2047511 | 0,010  | 9,10E-04 | 4,35E-02 | -0,32 |
| RCAN3    | cg00917251 | 1  | 24 829 987  | 0,056  | 1,30E-05 | 6,16E-05 | 1688299 | -0,005 | 6,87E-05 | 6,82E-03 | -0,32 |
| TRIM69   | cg15022400 | 15 | 45 028 161  | -0,062 | 2,56E-09 | 4,09E-08 | 1813430 | 0,003  | 7,89E-05 | 7,53E-03 | -0,32 |
| ATP2B4   | cg23598089 | 1  | 203 652 079 | -0,050 | 1,56E-05 | 7,26E-05 | 1680579 | 0,008  | 1,15E-05 | 1,81E-03 | -0,32 |
| ROBO3    | cg12859211 | 11 | 124 735 105 | 0,064  | 5,72E-10 | 1,17E-08 | 1731561 | -0,007 | 8,36E-05 | 7,89E-03 | -0,32 |
| CNN3     | cg14669167 | 1  | 95 391 585  | 0,060  | 9,90E-10 | 1,85E-08 | 1782439 | -0,003 | 9,73E-08 | 3,68E-05 | -0,32 |
| SREBF1   | cg08129017 | 17 | 17 728 660  | 0,067  | 8,79E-06 | 4,35E-05 | 2328986 | -0,006 | 7,31E-05 | 7,15E-03 | -0,32 |
| HOOK1    | cg15900248 | 1  | 60 280 812  | 0,093  | 2,52E-09 | 4,03E-08 | 1741406 | -0,004 | 4,11E-04 | 2,56E-02 | -0,32 |
| NLGN2    | cg15660077 | 17 | 7 311 620   | 0,055  | 3,64E-07 | 2,65E-06 | 1764158 | -0,004 | 9,47E-06 | 1,55E-03 | -0,32 |
| ASGR2    | cg26661623 | 17 | 7 019 262   | -0,081 | 3,04E-11 | 1,06E-09 | 1694966 | 0,003  | 9,53E-04 | 4,51E-02 | -0,32 |
| CLEC11A  | cg01130127 | 19 | 51 228 821  | 0,080  | 5,36E-12 | 2,74E-10 | 1807359 | -0,004 | 6,14E-04 | 3,42E-02 | -0,32 |
| SATB1    | cg19818826 | 3  | 18 467 816  | 0,088  | 1,95E-06 | 1,14E-05 | 3247857 | -0,007 | 7,00E-09 | 4,97E-06 | -0,32 |
| CNN3     | cg26619317 | 1  | 95 392 389  | 0,086  | 2,79E-13 | 3,30E-11 | 1782439 | -0,003 | 9,73E-08 | 3,68E-05 | -0,32 |
| RNF144A  | cg20437098 | 2  | 7 059 760   | 0,072  | 2,74E-14 | 7,68E-12 | 1777660 | -0,007 | 4,67E-05 | 5,23E-03 | -0,31 |
| SOX12    | cg03901958 | 20 | 308 226     | 0,067  | 1,06E-10 | 2,91E-09 | 1736974 | -0,002 | 1,47E-05 | 2,20E-03 | -0,31 |
| APBA2    | cg17716765 | 15 | 29 407 853  | 0,093  | 7,23E-12 | 3,43E-10 | 1723626 | -0,010 | 4,50E-10 | 5,35E-07 | -0,31 |
| OSBPL5   | cg06131936 | 11 | 3 187 271   | -0,100 | 2,87E-10 | 6,61E-09 | 2307032 | 0,009  | 2,71E-05 | 3,52E-03 | -0,31 |
| TRAF3IP2 | cg26379258 | 6  | 111 888 446 | 0,090  | 9,38E-09 | 1,21E-07 | 1701514 | -0,007 | 1,50E-05 | 2,21E-03 | -0,31 |
| ROBO3    | cg17272642 | 11 | 124 747 244 | 0,060  | 1,87E-09 | 3,15E-08 | 1731561 | -0,007 | 8,36E-05 | 7,89E-03 | -0,31 |
| TMIGD2   | cg03757250 | 19 | 4 302 846   | 0,069  | 9,77E-13 | 7,86E-11 | 2160577 | -0,004 | 8,06E-07 | 2,06E-04 | -0,31 |
| CLCF1    | cg14588642 | 11 | 67 139 423  | -0,074 | 8,73E-10 | 1,67E-08 | 1661197 | 0,005  | 7,40E-04 | 3,85E-02 | -0,31 |
| CNN3     | cg18344652 | 1  | 95 393 096  | 0,098  | 6,58E-11 | 1,98E-09 | 1782439 | -0,003 | 9,73E-08 | 3,68E-05 | -0,31 |
| SPEG     | cg16440561 | 2  | 220 312 854 | 0,149  | 2,23E-10 | 5,37E-09 | 1740052 | -0,003 | 6,40E-05 | 6,51E-03 | -0,31 |
| BLK      | cg16861076 | 8  | 11 421 594  | 0,052  | 3,89E-08 | 3,97E-07 | 1668277 | -0,006 | 5,14E-06 | 9,20E-04 | -0,31 |
| TLN1     | cg00833393 | 9  | 35 731 638  | -0,063 | 2,83E-12 | 1,70E-10 | 1696643 | 0,007  | 2,13E-07 | 6,84E-05 | -0,31 |
| EPHX2    | cg25399743 | 8  | 27 348 177  | 0,056  | 2,05E-05 | 9,30E-05 | 1709237 | -0,013 | 4,60E-11 | 7,16E-08 | -0,31 |
| TMIGD2   | cg20790056 | 19 | 4 303 012   | 0,076  | 1,10E-12 | 8,58E-11 | 2160577 | -0,004 | 8,06E-07 | 2,06E-04 | -0,31 |
| NCAM1    | cg12978214 | 11 | 113 145 174 | -0,068 | 5,78E-09 | 8,05E-08 | 1676289 | 0,003  | 1,25E-04 | 1,09E-02 | -0,31 |
| ZNF518B  | cg23995914 | 4  | 10 459 228  | 0,102  | 2,35E-16 | 6,27E-13 | 1682449 | -0,007 | 1,77E-07 | 5,88E-05 | -0,31 |
| ITGAE    | cg11011533 | 17 | 3 674 649   | 0,124  | 4,43E-13 | 4,53E-11 | 1683927 | -0,004 | 1,08E-03 | 4,91E-02 | -0,31 |
| NCAM1    | cg02323699 | 11 | 113 135 432 | -0,075 | 7,26E-08 | 6,70E-07 | 1676289 | 0,003  | 1,25E-04 | 1,09E-02 | -0,30 |
| TGFBR2   | cg13724812 | 3  | 30 689 835  | 0,106  | 1,02E-10 | 2,83E-09 | 2384241 | -0,014 | 2,02E-06 | 4,37E-04 | -0,30 |
| GSTP1    | cg25866895 | 11 | 67 350 326  | -0,055 | 1,07E-05 | 5,19E-05 | 1679809 | 0,006  | 1,67E-04 | 1,34E-02 | -0,30 |
| ZNF518B  | cg16295725 | 4  | 10 459 219  | 0,064  | 2,11E-12 | 1,37E-10 | 1682449 | -0,007 | 1,77E-07 | 5,88E-05 | -0,30 |
| IGF1R    | cg22375192 | 15 | 99 193 466  | 0,085  | 2,99E-10 | 6,85E-09 | 1744023 | -0,008 | 1,21E-09 | 1,19E-06 | -0,30 |

|          |            |    |             |        |          |          |         |        |          |          |       |
|----------|------------|----|-------------|--------|----------|----------|---------|--------|----------|----------|-------|
| MATK     | cg17880816 | 19 | 3 789 435   | -0,051 | 2,41E-05 | 1,07E-04 | 2319000 | 0,009  | 2,00E-04 | 1,56E-02 | -0,30 |
| NT5E     | cg17644557 | 6  | 86 159 103  | 0,098  | 1,04E-14 | 4,56E-12 | 1697220 | -0,006 | 1,13E-06 | 2,73E-04 | -0,30 |
| SATB1    | cg18808261 | 3  | 18 464 935  | 0,089  | 1,33E-06 | 8,17E-06 | 3247857 | -0,007 | 7,00E-09 | 4,97E-06 | -0,30 |
| IFT140   | cg26931990 | 16 | 1 661 230   | 0,096  | 2,13E-15 | 1,99E-12 | 1751559 | -0,007 | 1,40E-07 | 5,07E-05 | -0,30 |
| SNX29    | cg04635642 | 16 | 12 183 938  | 0,125  | 1,96E-09 | 3,27E-08 | 1670539 | -0,007 | 4,15E-04 | 2,58E-02 | -0,30 |
| MAPK1    | cg11335969 | 22 | 22 118 304  | -0,059 | 9,33E-04 | 2,95E-03 | 2235283 | 0,006  | 5,38E-04 | 3,15E-02 | -0,30 |
| SLC7A6   | cg03987842 | 16 | 68 321 858  | 0,063  | 6,68E-04 | 2,18E-03 | 1812559 | -0,014 | 1,15E-08 | 7,16E-06 | -0,30 |
| IFT140   | cg07013955 | 16 | 1 595 532   | 0,084  | 6,91E-07 | 4,60E-06 | 3241657 | -0,007 | 2,82E-07 | 8,79E-05 | -0,30 |
| TMIGD2   | cg22245273 | 19 | 4 302 448   | 0,054  | 3,42E-08 | 3,57E-07 | 2160577 | -0,004 | 8,06E-07 | 2,06E-04 | -0,30 |
| ALDH5A1  | cg25181693 | 6  | 24 495 846  | 0,058  | 1,22E-09 | 2,21E-08 | 2372398 | -0,004 | 6,13E-06 | 1,06E-03 | -0,30 |
| ZNF629   | cg22311615 | 16 | 30 798 776  | 0,075  | 1,23E-12 | 9,31E-11 | 1810891 | -0,002 | 2,02E-04 | 1,57E-02 | -0,30 |
| PYGB     | cg04348305 | 20 | 25 230 959  | 0,101  | 1,45E-13 | 2,14E-11 | 1778360 | -0,006 | 8,56E-04 | 4,20E-02 | -0,30 |
| HOOK1    | cg16378352 | 1  | 60 280 106  | 0,066  | 4,05E-08 | 4,10E-07 | 1741406 | -0,004 | 4,11E-04 | 2,56E-02 | -0,30 |
| ACOT11   | cg11837749 | 1  | 55 047 332  | -0,056 | 5,79E-06 | 2,99E-05 | 1778373 | 0,007  | 5,68E-05 | 6,01E-03 | -0,30 |
| GAS7     | cg18657751 | 17 | 9 834 056   | -0,090 | 2,96E-07 | 2,21E-06 | 1745994 | 0,007  | 3,68E-04 | 2,38E-02 | -0,30 |
| RASSF4   | cg02076355 | 10 | 45 474 372  | -0,055 | 1,85E-07 | 1,49E-06 | 1690566 | 0,004  | 2,98E-05 | 3,81E-03 | -0,30 |
| GFI1     | cg14179389 | 1  | 92 947 961  | -0,055 | 5,06E-05 | 2,10E-04 | 1690420 | 0,006  | 2,39E-04 | 1,75E-02 | -0,30 |
| LTK      | cg27021986 | 15 | 41 805 273  | 0,067  | 2,12E-11 | 7,94E-10 | 1679290 | -0,005 | 4,55E-05 | 5,11E-03 | -0,30 |
| ROBO1    | cg14467816 | 3  | 78 841 760  | -0,077 | 3,55E-08 | 3,68E-07 | 1806790 | -0,003 | 4,96E-07 | 1,40E-04 | 0,30  |
| MCF2L    | cg21331791 | 13 | 113 653 004 | -0,056 | 2,00E-07 | 1,59E-06 | 3307483 | -0,003 | 5,05E-05 | 5,52E-03 | 0,30  |
| INF2     | cg05018513 | 14 | 105 173 980 | -0,073 | 2,25E-09 | 3,67E-08 | 1727248 | -0,004 | 5,89E-05 | 6,19E-03 | 0,30  |
| RHBDF2   | cg20690125 | 17 | 74 476 978  | 0,108  | 1,12E-10 | 3,06E-09 | 1691717 | 0,006  | 6,81E-04 | 3,67E-02 | 0,30  |
| RGS12    | cg17569842 | 4  | 3 371 566   | 0,069  | 2,96E-08 | 3,17E-07 | 1722834 | 0,006  | 2,35E-06 | 4,96E-04 | 0,30  |
| RB1      | cg13431205 | 13 | 48 893 174  | 0,062  | 2,27E-06 | 1,30E-05 | 1786429 | 0,005  | 7,33E-04 | 3,84E-02 | 0,30  |
| APBA2    | cg22135269 | 15 | 29 338 250  | -0,055 | 9,89E-06 | 4,83E-05 | 1723626 | -0,010 | 4,50E-10 | 5,35E-07 | 0,30  |
| IGFBP3   | cg10094651 | 7  | 45 961 778  | 0,063  | 3,39E-09 | 5,16E-08 | 2396875 | 0,005  | 1,50E-07 | 5,36E-05 | 0,30  |
| ESPN     | cg10949430 | 1  | 6 496 243   | -0,058 | 8,14E-09 | 1,07E-07 | 1765109 | -0,013 | 8,36E-07 | 2,11E-04 | 0,30  |
| IGFBP3   | cg23455440 | 7  | 45 961 508  | 0,076  | 3,46E-11 | 1,17E-09 | 1746085 | 0,005  | 2,00E-05 | 2,80E-03 | 0,30  |
| NBEAL2   | cg02534363 | 3  | 47 050 950  | 0,098  | 5,90E-08 | 5,63E-07 | 1660629 | 0,010  | 3,96E-06 | 7,43E-04 | 0,30  |
| SH3PXD2A | cg01428849 | 10 | 105 411 075 | -0,071 | 1,00E-07 | 8,80E-07 | 1743103 | -0,006 | 1,87E-05 | 2,64E-03 | 0,30  |
| SH3PXD2A | cg08740008 | 10 | 105 373 505 | -0,055 | 6,89E-07 | 4,59E-06 | 1743103 | -0,006 | 1,87E-05 | 2,64E-03 | 0,30  |
| PRRG2    | cg04201347 | 19 | 50 086 849  | -0,074 | 5,06E-07 | 3,51E-06 | 2064150 | -0,004 | 7,99E-04 | 4,01E-02 | 0,30  |
| LTBP3    | cg03101763 | 11 | 65 319 844  | -0,059 | 3,35E-11 | 1,14E-09 | 1805395 | -0,012 | 6,47E-09 | 4,97E-06 | 0,30  |
| LTBP4    | cg22046408 | 19 | 41 106 164  | 0,098  | 1,14E-10 | 3,08E-09 | 1665219 | 0,006  | 7,70E-04 | 3,94E-02 | 0,30  |
| MCF2L    | cg22004422 | 13 | 113 740 730 | -0,063 | 2,65E-07 | 2,02E-06 | 3307483 | -0,003 | 5,05E-05 | 5,52E-03 | 0,30  |
| CLEC11A  | cg25309343 | 19 | 51 226 207  | -0,066 | 9,75E-11 | 2,73E-09 | 1807359 | -0,004 | 6,14E-04 | 3,42E-02 | 0,30  |
| CRABP2   | cg02363950 | 1  | 156 676 793 | 0,084  | 6,02E-11 | 1,84E-09 | 1690170 | 0,005  | 2,70E-04 | 1,90E-02 | 0,31  |
| SLC7A8   | cg21523574 | 14 | 23 595 597  | -0,062 | 6,51E-07 | 4,37E-06 | 1807894 | -0,003 | 6,95E-04 | 3,73E-02 | 0,31  |
| ABR      | cg05707655 | 17 | 908 690     | 0,096  | 1,61E-11 | 6,40E-10 | 1672878 | 0,006  | 5,60E-04 | 3,21E-02 | 0,31  |
| SNX29    | cg02946846 | 16 | 12 632 861  | -0,070 | 2,99E-07 | 2,23E-06 | 1670539 | -0,007 | 4,15E-04 | 2,58E-02 | 0,31  |
| ELMO1    | cg24237862 | 7  | 37 026 842  | -0,059 | 8,98E-08 | 8,01E-07 | 3200299 | -0,004 | 3,62E-04 | 2,36E-02 | 0,31  |
| C1QTNF6  | cg07573342 | 22 | 37 582 320  | -0,077 | 7,52E-06 | 3,78E-05 | 1729288 | -0,006 | 5,33E-04 | 3,12E-02 | 0,31  |
| ADAP2    | cg05052633 | 17 | 29 249 485  | 0,077  | 5,45E-12 | 2,78E-10 | 1763000 | 0,003  | 9,77E-04 | 4,60E-02 | 0,31  |

|         |            |    |             |        |          |          |         |        |          |          |      |
|---------|------------|----|-------------|--------|----------|----------|---------|--------|----------|----------|------|
| SDK2    | cg26504421 | 17 | 71 339 361  | -0,065 | 4,74E-06 | 2,51E-05 | 1676709 | -0,007 | 6,79E-05 | 6,77E-03 | 0,31 |
| INF2    | cg04966159 | 14 | 105 173 801 | -0,057 | 6,08E-08 | 5,77E-07 | 1727248 | -0,004 | 5,89E-05 | 6,19E-03 | 0,31 |
| MCF2L   | cg12339531 | 13 | 113 650 822 | -0,056 | 2,05E-07 | 1,62E-06 | 3307483 | -0,003 | 5,05E-05 | 5,52E-03 | 0,31 |
| CACHD1  | cg17181043 | 1  | 64 961 535  | -0,096 | 6,07E-08 | 5,77E-07 | 1738854 | -0,005 | 1,55E-11 | 2,96E-08 | 0,32 |
| ATP10A  | cg01372572 | 15 | 25 941 836  | -0,051 | 1,11E-06 | 6,98E-06 | 3307935 | -0,004 | 2,14E-05 | 2,94E-03 | 0,32 |
| MTHFD1L | cg21691367 | 6  | 151 325 642 | -0,087 | 6,35E-08 | 5,99E-07 | 1772521 | -0,002 | 4,79E-04 | 2,87E-02 | 0,32 |
| ROBO1   | cg15429180 | 3  | 79 137 306  | -0,077 | 3,46E-07 | 2,53E-06 | 1806790 | -0,003 | 4,96E-07 | 1,40E-04 | 0,32 |
| CACHD1  | cg25210796 | 1  | 65 089 808  | -0,083 | 1,33E-06 | 8,15E-06 | 1738854 | -0,005 | 1,55E-11 | 2,96E-08 | 0,32 |
| SNX29   | cg01223986 | 16 | 12 265 008  | -0,067 | 4,18E-07 | 2,98E-06 | 1670539 | -0,007 | 4,15E-04 | 2,58E-02 | 0,32 |
| ENGASE  | cg14609289 | 17 | 77 083 037  | -0,051 | 3,23E-12 | 1,87E-10 | 1815366 | -0,005 | 1,89E-04 | 1,48E-02 | 0,32 |
| INF2    | cg23956771 | 14 | 105 184 057 | -0,079 | 1,94E-07 | 1,55E-06 | 1727248 | -0,004 | 5,89E-05 | 6,19E-03 | 0,32 |
| IGFBP3  | cg10094651 | 7  | 45 961 778  | 0,063  | 3,39E-09 | 5,16E-08 | 1746085 | 0,005  | 2,00E-05 | 2,80E-03 | 0,32 |
| CACHD1  | cg11795488 | 1  | 65 038 492  | -0,086 | 1,25E-07 | 1,06E-06 | 1738854 | -0,005 | 1,55E-11 | 2,96E-08 | 0,32 |
| SDK2    | cg01691104 | 17 | 71 612 776  | -0,066 | 2,32E-08 | 2,58E-07 | 1676709 | -0,007 | 6,79E-05 | 6,77E-03 | 0,33 |
| OSBPL5  | cg23357130 | 11 | 3 181 928   | 0,071  | 3,21E-06 | 1,77E-05 | 1802151 | 0,008  | 8,45E-04 | 4,16E-02 | 0,33 |
| SPIRE1  | cg15920762 | 18 | 12 657 056  | 0,057  | 4,82E-07 | 3,37E-06 | 1757845 | 0,003  | 2,82E-04 | 1,97E-02 | 0,33 |
| SATB2   | cg10185119 | 2  | 200 325 426 | 0,064  | 8,20E-09 | 1,08E-07 | 1738657 | 0,002  | 2,09E-04 | 1,61E-02 | 0,33 |
| LIMK2   | cg07713946 | 22 | 31 675 144  | 0,101  | 1,24E-07 | 1,05E-06 | 2367671 | 0,001  | 5,87E-04 | 3,32E-02 | 0,33 |
| CACHD1  | cg24639703 | 1  | 64 986 155  | -0,085 | 1,05E-05 | 5,08E-05 | 1738854 | -0,005 | 1,55E-11 | 2,96E-08 | 0,33 |
| CNN3    | cg12613632 | 1  | 95 385 935  | -0,073 | 3,38E-09 | 5,14E-08 | 1782439 | -0,003 | 9,73E-08 | 3,68E-05 | 0,33 |
| MCF2L   | cg18289306 | 13 | 113 640 169 | -0,070 | 2,72E-08 | 2,95E-07 | 3307483 | -0,003 | 5,05E-05 | 5,52E-03 | 0,33 |
| APEX1   | cg16205058 | 14 | 20 924 369  | -0,068 | 1,13E-10 | 3,07E-09 | 2319344 | -0,006 | 5,31E-04 | 3,11E-02 | 0,33 |
| CACHD1  | cg21679730 | 1  | 65 047 485  | -0,053 | 2,12E-07 | 1,67E-06 | 1738854 | -0,005 | 1,55E-11 | 2,96E-08 | 0,33 |
| FGR     | cg03018771 | 1  | 27 940 619  | 0,074  | 1,45E-09 | 2,55E-08 | 2368318 | 0,017  | 8,84E-08 | 3,41E-05 | 0,33 |
| LRRC16A | cg03372385 | 6  | 25 324 431  | -0,065 | 7,85E-04 | 2,52E-03 | 3244461 | -0,002 | 2,33E-04 | 1,72E-02 | 0,33 |
| RB1     | cg03085377 | 13 | 48 893 376  | 0,062  | 4,35E-06 | 2,32E-05 | 1786429 | 0,005  | 7,33E-04 | 3,84E-02 | 0,33 |
| NDUFS2  | cg17904988 | 1  | 161 168 451 | -0,055 | 1,28E-06 | 7,87E-06 | 1789342 | -0,003 | 5,05E-04 | 2,99E-02 | 0,33 |
| PLEKHB1 | cg02201052 | 11 | 73 357 741  | -0,057 | 5,07E-09 | 7,23E-08 | 1783231 | -0,006 | 7,93E-06 | 1,34E-03 | 0,33 |
| IGFBP3  | cg23455440 | 7  | 45 961 508  | 0,076  | 3,46E-11 | 1,17E-09 | 2396875 | 0,005  | 1,50E-07 | 5,36E-05 | 0,34 |
| IFT140  | cg01356115 | 16 | 1 614 807   | -0,057 | 2,83E-07 | 2,13E-06 | 1751559 | -0,007 | 1,40E-07 | 5,07E-05 | 0,34 |
| INF2    | cg00816970 | 14 | 105 181 035 | -0,061 | 3,91E-08 | 3,99E-07 | 1727248 | -0,004 | 5,89E-05 | 6,19E-03 | 0,34 |
| IGFBP3  | cg24772240 | 7  | 45 961 537  | 0,056  | 6,53E-09 | 8,92E-08 | 2396875 | 0,005  | 1,50E-07 | 5,36E-05 | 0,34 |
| MCF2L   | cg17113476 | 13 | 113 720 009 | -0,059 | 3,91E-09 | 5,81E-08 | 3307483 | -0,003 | 5,05E-05 | 5,52E-03 | 0,34 |
| ROBO1   | cg00906420 | 3  | 78 917 133  | -0,103 | 9,33E-09 | 1,20E-07 | 1806790 | -0,003 | 4,96E-07 | 1,40E-04 | 0,34 |
| DCHS1   | cg16770368 | 11 | 6 673 784   | -0,075 | 3,43E-10 | 7,68E-09 | 1739640 | -0,003 | 2,57E-08 | 1,38E-05 | 0,34 |
| CACHD1  | cg00825690 | 1  | 64 960 202  | -0,081 | 2,34E-07 | 1,82E-06 | 1738854 | -0,005 | 1,55E-11 | 2,96E-08 | 0,34 |
| SATB2   | cg17204275 | 2  | 200 321 136 | 0,056  | 3,49E-12 | 1,99E-10 | 1738657 | 0,002  | 2,09E-04 | 1,61E-02 | 0,34 |
| ABR     | cg01841306 | 17 | 908 923     | 0,081  | 5,39E-07 | 3,71E-06 | 1672878 | 0,006  | 5,60E-04 | 3,21E-02 | 0,34 |
| IGFBP3  | cg09619271 | 7  | 45 961 289  | 0,087  | 2,87E-10 | 6,62E-09 | 2396875 | 0,005  | 1,50E-07 | 5,36E-05 | 0,34 |
| LILRB1  | cg02340056 | 19 | 55 141 979  | 0,068  | 3,34E-08 | 3,51E-07 | 1708248 | 0,002  | 2,52E-04 | 1,80E-02 | 0,34 |
| P2RX6   | cg01653494 | 22 | 21 372 286  | -0,065 | 9,68E-10 | 1,82E-08 | 3243924 | -0,003 | 6,80E-05 | 6,77E-03 | 0,34 |
| CNN3    | cg25311623 | 1  | 95 375 671  | -0,106 | 2,69E-07 | 2,04E-06 | 1782439 | -0,003 | 9,73E-08 | 3,68E-05 | 0,34 |
| ITGB2   | cg18012089 | 21 | 46 327 720  | 0,060  | 2,97E-05 | 1,30E-04 | 2175912 | 0,006  | 1,25E-04 | 1,09E-02 | 0,34 |

|          |            |    |             |        |          |          |         |        |          |          |      |
|----------|------------|----|-------------|--------|----------|----------|---------|--------|----------|----------|------|
| GPC2     | cg01942654 | 7  | 99 773 786  | -0,053 | 1,23E-06 | 7,64E-06 | 1651642 | -0,003 | 8,65E-04 | 4,23E-02 | 0,35 |
| RB1      | cg07880715 | 13 | 48 895 478  | 0,052  | 1,52E-07 | 1,25E-06 | 1786429 | 0,005  | 7,33E-04 | 3,84E-02 | 0,35 |
| BLK      | cg24861686 | 8  | 11 418 058  | -0,051 | 8,19E-11 | 2,36E-09 | 1668277 | -0,006 | 5,14E-06 | 9,20E-04 | 0,35 |
| SNX29    | cg04637129 | 16 | 12 212 548  | -0,066 | 1,32E-07 | 1,11E-06 | 1670539 | -0,007 | 4,15E-04 | 2,58E-02 | 0,35 |
| MCF2L    | cg20074340 | 13 | 113 651 420 | -0,053 | 3,06E-08 | 3,25E-07 | 3307483 | -0,003 | 5,05E-05 | 5,52E-03 | 0,35 |
| SDK2     | cg22121495 | 17 | 71 420 061  | -0,051 | 6,47E-06 | 3,31E-05 | 1676709 | -0,007 | 6,79E-05 | 6,77E-03 | 0,35 |
| CACHD1   | cg10381153 | 1  | 65 062 855  | -0,088 | 2,99E-08 | 3,20E-07 | 1738854 | -0,005 | 1,55E-11 | 2,96E-08 | 0,35 |
| INF2     | cg05210373 | 14 | 105 173 786 | -0,063 | 1,66E-06 | 9,90E-06 | 1727248 | -0,004 | 5,89E-05 | 6,19E-03 | 0,35 |
| IGF1R    | cg16735875 | 15 | 99 367 484  | -0,053 | 2,55E-08 | 2,80E-07 | 1744023 | -0,008 | 1,21E-09 | 1,19E-06 | 0,35 |
| LRRC16A  | cg23737208 | 6  | 25 499 464  | -0,052 | 3,20E-04 | 1,12E-03 | 3244461 | -0,002 | 2,33E-04 | 1,72E-02 | 0,35 |
| GIPC3    | cg25597797 | 19 | 3 589 762   | -0,116 | 3,23E-07 | 2,39E-06 | 3253728 | -0,002 | 8,79E-06 | 1,46E-03 | 0,35 |
| SDK2     | cg20458433 | 17 | 71 463 069  | -0,065 | 1,56E-07 | 1,28E-06 | 1676709 | -0,007 | 6,79E-05 | 6,77E-03 | 0,35 |
| IGFBP3   | cg24772240 | 7  | 45 961 537  | 0,056  | 6,53E-09 | 8,92E-08 | 1746085 | 0,005  | 2,00E-05 | 2,80E-03 | 0,35 |
| RPL13    | cg02732508 | 16 | 89 628 853  | -0,071 | 2,03E-05 | 9,20E-05 | 2413278 | -0,006 | 8,54E-06 | 1,43E-03 | 0,35 |
| LRRC16A  | cg21272716 | 6  | 25 619 939  | -0,060 | 4,86E-06 | 2,56E-05 | 3244461 | -0,002 | 2,33E-04 | 1,72E-02 | 0,36 |
| SERPINE2 | cg20793341 | 2  | 224 897 527 | -0,073 | 3,83E-08 | 3,92E-07 | 1655595 | -0,007 | 1,25E-08 | 7,58E-06 | 0,36 |
| SDK2     | cg24527434 | 17 | 71 544 677  | -0,063 | 3,13E-06 | 1,73E-05 | 1676709 | -0,007 | 6,79E-05 | 6,77E-03 | 0,36 |
| IGFBP3   | cg26434048 | 7  | 45 961 569  | 0,064  | 8,33E-08 | 7,52E-07 | 1746085 | 0,005  | 2,00E-05 | 2,80E-03 | 0,36 |
| IGFBP3   | cg02120774 | 7  | 45 961 473  | 0,058  | 9,57E-11 | 2,68E-09 | 1746085 | 0,005  | 2,00E-05 | 2,80E-03 | 0,36 |
| TM6SF1   | cg09682213 | 15 | 83 777 082  | 0,057  | 6,54E-06 | 3,34E-05 | 1784256 | 0,005  | 7,34E-05 | 7,16E-03 | 0,36 |
| IFT140   | cg03515656 | 16 | 1 600 304   | -0,086 | 1,86E-07 | 1,49E-06 | 3241657 | -0,007 | 2,82E-07 | 8,79E-05 | 0,36 |
| ABLIM1   | cg03850986 | 10 | 116 408 382 | -0,097 | 1,14E-12 | 8,76E-11 | 2396672 | -0,008 | 9,88E-06 | 1,61E-03 | 0,36 |
| SATB2    | cg03163783 | 2  | 200 326 591 | 0,090  | 4,09E-10 | 8,89E-09 | 1738657 | 0,002  | 2,09E-04 | 1,61E-02 | 0,36 |
| PDE9A    | cg21688288 | 21 | 44 181 258  | -0,050 | 7,99E-07 | 5,22E-06 | 1683063 | -0,004 | 3,02E-06 | 6,05E-04 | 0,36 |
| IGFBP3   | cg26434048 | 7  | 45 961 569  | 0,064  | 8,33E-08 | 7,52E-07 | 2396875 | 0,005  | 1,50E-07 | 5,36E-05 | 0,36 |
| SPEG     | cg24685587 | 2  | 220 300 568 | -0,061 | 1,32E-05 | 6,27E-05 | 1740052 | -0,003 | 6,40E-05 | 6,51E-03 | 0,37 |
| ROBO1    | cg08147563 | 3  | 79 028 263  | -0,075 | 1,97E-07 | 1,56E-06 | 1806790 | -0,003 | 4,96E-07 | 1,40E-04 | 0,37 |
| MCF2L    | cg09508934 | 13 | 113 717 379 | -0,060 | 4,56E-08 | 4,53E-07 | 3307483 | -0,003 | 5,05E-05 | 5,52E-03 | 0,37 |
| PLAG1    | cg21448513 | 8  | 57 103 638  | -0,077 | 2,21E-08 | 2,48E-07 | 2287653 | -0,002 | 3,27E-05 | 4,09E-03 | 0,37 |
| NLGN2    | cg16950726 | 17 | 7 317 514   | -0,064 | 1,04E-06 | 6,56E-06 | 1764158 | -0,004 | 9,47E-06 | 1,55E-03 | 0,37 |
| CYB561   | cg22122808 | 17 | 61 511 683  | 0,069  | 8,56E-06 | 4,25E-05 | 1771179 | 0,005  | 2,74E-04 | 1,92E-02 | 0,37 |
| IGF1R    | cg05110803 | 15 | 99 385 323  | -0,094 | 3,45E-10 | 7,71E-09 | 1744023 | -0,008 | 1,21E-09 | 1,19E-06 | 0,37 |
| CLCF1    | cg11169848 | 11 | 67 142 030  | 0,062  | 2,00E-07 | 1,58E-06 | 1661197 | 0,005  | 7,40E-04 | 3,85E-02 | 0,37 |
| UBASH3B  | cg25994988 | 11 | 122 652 382 | -0,079 | 6,53E-14 | 1,30E-11 | 1653856 | -0,005 | 6,27E-07 | 1,65E-04 | 0,38 |
| CYB561   | cg18499750 | 17 | 61 511 735  | 0,074  | 3,13E-14 | 8,30E-12 | 1771179 | 0,005  | 2,74E-04 | 1,92E-02 | 0,38 |
| PPFIBP2  | cg26427534 | 11 | 7 659 067   | -0,087 | 2,80E-07 | 2,11E-06 | 1675656 | -0,008 | 7,09E-04 | 3,77E-02 | 0,38 |
| FGR      | cg03018771 | 1  | 27 940 619  | 0,074  | 1,45E-09 | 2,55E-08 | 1795158 | 0,015  | 2,30E-07 | 7,32E-05 | 0,38 |
| APEX1    | cg16205058 | 14 | 20 924 369  | -0,068 | 1,13E-10 | 3,07E-09 | 1661886 | -0,008 | 5,92E-04 | 3,34E-02 | 0,38 |
| IGFBP3   | cg09619271 | 7  | 45 961 289  | 0,087  | 2,87E-10 | 6,62E-09 | 1746085 | 0,005  | 2,00E-05 | 2,80E-03 | 0,38 |
| ROBO1    | cg01375651 | 3  | 79 026 069  | -0,061 | 1,61E-08 | 1,90E-07 | 1806790 | -0,003 | 4,96E-07 | 1,40E-04 | 0,38 |
| TNNT3    | cg09833701 | 11 | 1 959 051   | -0,082 | 4,13E-09 | 6,09E-08 | 2334080 | -0,003 | 2,91E-07 | 8,93E-05 | 0,38 |
| SDK2     | cg19786808 | 17 | 71 431 877  | -0,055 | 8,43E-07 | 5,47E-06 | 1676709 | -0,007 | 6,79E-05 | 6,77E-03 | 0,38 |
| KLHL29   | cg15736743 | 2  | 23 768 363  | -0,058 | 7,22E-06 | 3,65E-05 | 3178406 | -0,004 | 2,58E-05 | 3,36E-03 | 0,38 |

|          |            |    |             |        |          |          |         |        |          |          |      |
|----------|------------|----|-------------|--------|----------|----------|---------|--------|----------|----------|------|
| PDE9A    | cg00118229 | 21 | 44 088 420  | -0,073 | 1,21E-07 | 1,04E-06 | 1683063 | -0,004 | 3,02E-06 | 6,05E-04 | 0,39 |
| SERPINF1 | cg06940127 | 17 | 1 665 303   | -0,067 | 2,66E-10 | 6,20E-09 | 2141482 | -0,002 | 5,41E-04 | 3,15E-02 | 0,39 |
| SYTL3    | cg12934258 | 6  | 159 084 599 | 0,073  | 8,86E-09 | 1,15E-07 | 1720623 | 0,009  | 2,69E-06 | 5,47E-04 | 0,39 |
| PRSS23   | cg23771366 | 11 | 86 510 998  | 0,051  | 8,45E-06 | 4,20E-05 | 1797776 | 0,010  | 1,56E-04 | 1,29E-02 | 0,39 |
| ROBO1    | cg24512093 | 3  | 78 698 151  | -0,117 | 2,23E-09 | 3,65E-08 | 1806790 | -0,003 | 4,96E-07 | 1,40E-04 | 0,39 |
| PTK7     | cg08558323 | 6  | 43 097 370  | -0,055 | 8,16E-11 | 2,36E-09 | 2353202 | -0,002 | 8,48E-08 | 3,30E-05 | 0,39 |
| SDK2     | cg03695433 | 17 | 71 332 907  | -0,074 | 1,60E-07 | 1,31E-06 | 1676709 | -0,007 | 6,79E-05 | 6,77E-03 | 0,40 |
| ITGAE    | cg06468347 | 17 | 3 705 875   | -0,057 | 2,79E-04 | 9,85E-04 | 1683927 | -0,004 | 1,08E-03 | 4,91E-02 | 0,40 |
| SDK2     | cg14295306 | 17 | 71 355 182  | -0,087 | 1,21E-08 | 1,50E-07 | 1676709 | -0,007 | 6,79E-05 | 6,77E-03 | 0,40 |
| MMP28    | cg11992940 | 17 | 34 094 454  | -0,089 | 2,44E-10 | 5,79E-09 | 2399016 | -0,007 | 1,02E-12 | 3,74E-09 | 0,40 |
| IFT140   | cg03515656 | 16 | 1 600 304   | -0,086 | 1,86E-07 | 1,49E-06 | 1751559 | -0,007 | 1,40E-07 | 5,07E-05 | 0,41 |
| CACNA2D2 | cg26325335 | 3  | 50 402 333  | 0,101  | 2,53E-11 | 9,13E-10 | 1711049 | 0,006  | 2,31E-05 | 3,10E-03 | 0,41 |
| TNNT3    | cg06124793 | 11 | 1 939 725   | -0,053 | 5,09E-11 | 1,60E-09 | 2334080 | -0,003 | 2,91E-07 | 8,93E-05 | 0,41 |
| ROBO1    | cg15442678 | 3  | 79 065 762  | -0,091 | 4,84E-10 | 1,02E-08 | 1806790 | -0,003 | 4,96E-07 | 1,40E-04 | 0,41 |
| MCF2L    | cg21942572 | 13 | 113 707 517 | -0,055 | 2,87E-10 | 6,61E-09 | 3307483 | -0,003 | 5,05E-05 | 5,52E-03 | 0,41 |
| BTBD11   | cg11362622 | 12 | 107 836 508 | -0,085 | 6,31E-08 | 5,96E-07 | 1705066 | -0,014 | 9,52E-09 | 6,22E-06 | 0,41 |
| LDLRAP1  | cg11214576 | 1  | 25 869 068  | -0,059 | 6,54E-07 | 4,39E-06 | 1809040 | -0,008 | 6,75E-07 | 1,74E-04 | 0,41 |
| TNNT3    | cg04052013 | 11 | 1 959 246   | -0,054 | 2,62E-09 | 4,16E-08 | 2334080 | -0,003 | 2,91E-07 | 8,93E-05 | 0,41 |
| SDK2     | cg20614854 | 17 | 71 331 689  | -0,081 | 2,92E-07 | 2,19E-06 | 1676709 | -0,007 | 6,79E-05 | 6,77E-03 | 0,41 |
| PGAP2    | cg01134526 | 11 | 3 846 965   | -0,061 | 4,01E-07 | 2,88E-06 | 1755405 | -0,005 | 8,57E-05 | 8,07E-03 | 0,42 |
| IGF1R    | cg02613818 | 15 | 99 236 767  | -0,058 | 1,06E-06 | 6,70E-06 | 1744023 | -0,008 | 1,21E-09 | 1,19E-06 | 0,42 |
| ABR      | cg06237543 | 17 | 1 083 824   | 0,051  | 2,93E-05 | 1,28E-04 | 1672878 | 0,006  | 5,60E-04 | 3,21E-02 | 0,42 |
| ENTPD3   | cg12433782 | 3  | 40 427 210  | -0,060 | 3,98E-07 | 2,85E-06 | 1775114 | -0,002 | 3,76E-04 | 2,42E-02 | 0,42 |
| IGF1R    | cg18542304 | 15 | 99 288 216  | -0,057 | 3,81E-08 | 3,91E-07 | 1744023 | -0,008 | 1,21E-09 | 1,19E-06 | 0,42 |
| IGF1R    | cg01284192 | 15 | 99 500 473  | -0,066 | 2,43E-08 | 2,68E-07 | 1744023 | -0,008 | 1,21E-09 | 1,19E-06 | 0,42 |
| TNNT3    | cg08089153 | 11 | 1 956 292   | -0,090 | 5,70E-09 | 7,96E-08 | 2334080 | -0,003 | 2,91E-07 | 8,93E-05 | 0,42 |
| IGF1R    | cg11145296 | 15 | 99 400 281  | -0,069 | 1,07E-08 | 1,35E-07 | 1744023 | -0,008 | 1,21E-09 | 1,19E-06 | 0,42 |
| KCNT1    | cg13481132 | 9  | 138 606 811 | 0,086  | 1,13E-13 | 1,83E-11 | 1702255 | 0,004  | 5,85E-04 | 3,32E-02 | 0,42 |
| AEBP1    | cg08495088 | 7  | 44 143 290  | -0,060 | 1,98E-07 | 1,57E-06 | 1736178 | -0,004 | 5,23E-05 | 5,71E-03 | 0,42 |
| IGFBP3   | cg02120774 | 7  | 45 961 473  | 0,058  | 9,57E-11 | 2,68E-09 | 2396875 | 0,005  | 1,50E-07 | 5,36E-05 | 0,42 |
| NRCAM    | cg16073236 | 7  | 107 789 943 | -0,065 | 5,08E-07 | 3,52E-06 | 1722809 | -0,008 | 3,07E-16 | 3,11E-12 | 0,42 |
| BTBD11   | cg24671734 | 12 | 107 909 364 | -0,070 | 2,10E-08 | 2,37E-07 | 1705066 | -0,014 | 9,52E-09 | 6,22E-06 | 0,42 |
| GPR56    | cg09109520 | 16 | 57 673 258  | 0,070  | 1,27E-10 | 3,38E-09 | 2384122 | 0,018  | 5,05E-06 | 9,13E-04 | 0,42 |
| BTBD11   | cg04076774 | 12 | 107 954 581 | -0,061 | 4,81E-08 | 4,74E-07 | 1705066 | -0,014 | 9,52E-09 | 6,22E-06 | 0,43 |
| MYO15B   | cg09913882 | 17 | 73 612 981  | -0,058 | 1,93E-07 | 1,54E-06 | 3248649 | -0,009 | 2,39E-05 | 3,18E-03 | 0,43 |
| IGF1R    | cg21572688 | 15 | 99 391 577  | -0,050 | 1,20E-07 | 1,02E-06 | 1744023 | -0,008 | 1,21E-09 | 1,19E-06 | 0,43 |
| CDH23    | cg04567334 | 10 | 73 408 185  | -0,072 | 6,44E-08 | 6,06E-07 | 1783149 | -0,010 | 4,44E-08 | 2,04E-05 | 0,43 |
| IGF1R    | cg05169988 | 15 | 99 204 912  | -0,095 | 1,81E-09 | 3,07E-08 | 1744023 | -0,008 | 1,21E-09 | 1,19E-06 | 0,43 |
| BACH2    | cg17066529 | 6  | 90 754 140  | -0,066 | 1,44E-05 | 6,76E-05 | 1670695 | -0,007 | 2,54E-10 | 3,31E-07 | 0,43 |
| CR2      | cg26858300 | 1  | 207 643 142 | -0,063 | 1,54E-09 | 2,68E-08 | 2369666 | -0,004 | 6,46E-08 | 2,78E-05 | 0,43 |
| SPEG     | cg20456243 | 2  | 220 352 476 | -0,108 | 6,71E-08 | 6,28E-07 | 1740052 | -0,003 | 6,40E-05 | 6,51E-03 | 0,43 |
| PCSK5    | cg13438337 | 9  | 78 774 369  | -0,067 | 6,15E-07 | 4,16E-06 | 1767934 | -0,012 | 1,52E-13 | 7,67E-10 | 0,43 |
| CDH23    | cg08734090 | 10 | 73 479 514  | -0,055 | 2,58E-07 | 1,97E-06 | 1783149 | -0,010 | 4,44E-08 | 2,04E-05 | 0,43 |

|         |            |    |             |        |          |          |         |        |          |          |      |
|---------|------------|----|-------------|--------|----------|----------|---------|--------|----------|----------|------|
| BTBD11  | cg19939178 | 12 | 107 976 961 | -0,073 | 3,95E-07 | 2,84E-06 | 1705066 | -0,014 | 9,52E-09 | 6,22E-06 | 0,44 |
| SCRN1   | cg22799757 | 7  | 29 997 642  | -0,127 | 3,52E-08 | 3,66E-07 | 1756439 | -0,008 | 3,11E-07 | 9,34E-05 | 0,44 |
| APBA2   | cg07699300 | 15 | 29 392 964  | -0,067 | 4,20E-06 | 2,25E-05 | 1723626 | -0,010 | 4,50E-10 | 5,35E-07 | 0,44 |
| SDK2    | cg19787125 | 17 | 71 532 174  | -0,074 | 8,44E-06 | 4,19E-05 | 1676709 | -0,007 | 6,79E-05 | 6,77E-03 | 0,44 |
| SERINC5 | cg17542330 | 5  | 79 445 875  | -0,060 | 3,30E-07 | 2,43E-06 | 1789464 | -0,008 | 1,20E-07 | 4,38E-05 | 0,45 |
| CDH23   | cg15077792 | 10 | 73 324 481  | -0,062 | 1,31E-10 | 3,46E-09 | 1783149 | -0,010 | 4,44E-08 | 2,04E-05 | 0,45 |
| SCRN1   | cg18395623 | 7  | 29 986 771  | -0,086 | 5,23E-12 | 2,69E-10 | 1756439 | -0,008 | 3,11E-07 | 9,34E-05 | 0,45 |
| LRRC16A | cg09110394 | 6  | 25 301 880  | -0,095 | 3,00E-09 | 4,66E-08 | 3244461 | -0,002 | 2,33E-04 | 1,72E-02 | 0,45 |
| APBA2   | cg08121164 | 15 | 29 404 922  | -0,050 | 5,39E-06 | 2,81E-05 | 1723626 | -0,010 | 4,50E-10 | 5,35E-07 | 0,45 |
| NPM3    | cg05901193 | 10 | 103 541 206 | -0,053 | 5,41E-07 | 3,72E-06 | 2110252 | -0,009 | 1,58E-09 | 1,46E-06 | 0,45 |
| IGF1R   | cg20388729 | 15 | 99 200 492  | -0,092 | 1,29E-06 | 7,94E-06 | 1744023 | -0,008 | 1,21E-09 | 1,19E-06 | 0,45 |
| CDH23   | cg04161859 | 10 | 73 404 657  | -0,076 | 1,19E-07 | 1,02E-06 | 1783149 | -0,010 | 4,44E-08 | 2,04E-05 | 0,46 |
| BTBD11  | cg10673246 | 12 | 108 003 445 | -0,051 | 1,03E-07 | 9,00E-07 | 1705066 | -0,014 | 9,52E-09 | 6,22E-06 | 0,46 |
| FLNB    | cg20840069 | 3  | 58 147 905  | -0,062 | 8,30E-07 | 5,40E-06 | 1664922 | -0,013 | 3,39E-12 | 9,15E-09 | 0,46 |
| ADD2    | cg02674324 | 2  | 70 932 722  | -0,071 | 3,01E-08 | 3,22E-07 | 1833858 | -0,008 | 9,29E-10 | 9,90E-07 | 0,46 |
| ADD2    | cg06915226 | 2  | 70 960 959  | -0,070 | 1,09E-06 | 6,85E-06 | 1833858 | -0,008 | 9,29E-10 | 9,90E-07 | 0,46 |
| FBLN2   | cg15097422 | 3  | 13 597 750  | -0,075 | 8,39E-10 | 1,62E-08 | 2390919 | -0,009 | 1,62E-17 | 2,18E-13 | 0,47 |
| SOX13   | cg07142667 | 1  | 204 041 849 | 0,054  | 1,50E-07 | 1,24E-06 | 1683755 | 0,006  | 3,30E-05 | 4,11E-03 | 0,47 |
| NRCAM   | cg23543795 | 7  | 107 965 081 | -0,096 | 3,11E-08 | 3,30E-07 | 1722809 | -0,008 | 3,07E-16 | 3,11E-12 | 0,47 |
| FBLN2   | cg15097422 | 3  | 13 597 750  | -0,075 | 8,39E-10 | 1,62E-08 | 1774602 | -0,011 | 2,16E-19 | 4,36E-15 | 0,47 |
| CDH23   | cg05848785 | 10 | 73 480 942  | -0,059 | 1,81E-08 | 2,10E-07 | 1783149 | -0,010 | 4,44E-08 | 2,04E-05 | 0,48 |
| BTBD11  | cg27431274 | 12 | 107 979 028 | -0,100 | 9,60E-10 | 1,81E-08 | 1705066 | -0,014 | 9,52E-09 | 6,22E-06 | 0,48 |
| TBC1D4  | cg24425149 | 13 | 75 991 251  | -0,088 | 9,00E-13 | 7,42E-11 | 1688098 | -0,010 | 1,95E-07 | 6,35E-05 | 0,48 |
| PDE9A   | cg21688288 | 21 | 44 181 258  | -0,050 | 7,99E-07 | 5,22E-06 | 2306540 | -0,015 | 1,61E-11 | 2,96E-08 | 0,48 |
| ADD2    | cg24938166 | 2  | 70 941 682  | -0,064 | 2,21E-08 | 2,47E-07 | 1833858 | -0,008 | 9,29E-10 | 9,90E-07 | 0,48 |
| TARBP1  | cg02838825 | 1  | 234 613 490 | -0,057 | 1,70E-06 | 1,01E-05 | 1803036 | -0,008 | 3,47E-06 | 6,74E-04 | 0,49 |
| CDH23   | cg09501025 | 10 | 73 312 955  | -0,098 | 1,74E-07 | 1,41E-06 | 1783149 | -0,010 | 4,44E-08 | 2,04E-05 | 0,49 |
| BTBD11  | cg00174508 | 12 | 107 774 298 | -0,063 | 7,01E-10 | 1,39E-08 | 1705066 | -0,014 | 9,52E-09 | 6,22E-06 | 0,49 |
| CDH23   | cg03033796 | 10 | 73 445 156  | -0,077 | 7,09E-09 | 9,56E-08 | 1783149 | -0,010 | 4,44E-08 | 2,04E-05 | 0,50 |
| NRCAM   | cg24429533 | 7  | 107 886 896 | -0,083 | 2,57E-08 | 2,81E-07 | 1722809 | -0,008 | 3,07E-16 | 3,11E-12 | 0,50 |
| APBA2   | cg07148167 | 15 | 29 403 393  | -0,052 | 2,01E-07 | 1,59E-06 | 1723626 | -0,010 | 4,50E-10 | 5,35E-07 | 0,50 |
| CHD7    | cg21340143 | 8  | 61 676 203  | -0,062 | 1,21E-07 | 1,03E-06 | 1677376 | -0,006 | 8,96E-05 | 8,34E-03 | 0,50 |
| FBLN2   | cg16157615 | 3  | 13 607 231  | -0,078 | 1,59E-10 | 4,06E-09 | 1774602 | -0,011 | 2,16E-19 | 4,36E-15 | 0,50 |
| NRCAM   | cg25994871 | 7  | 107 967 614 | -0,080 | 2,90E-09 | 4,52E-08 | 1722809 | -0,008 | 3,07E-16 | 3,11E-12 | 0,50 |
| PCSK5   | cg14178077 | 9  | 78 777 801  | -0,106 | 8,02E-08 | 7,29E-07 | 1767934 | -0,012 | 1,52E-13 | 7,67E-10 | 0,51 |
| KBTBD11 | cg20849109 | 8  | 1 954 777   | -0,085 | 2,35E-09 | 3,81E-08 | 1784630 | -0,006 | 7,26E-04 | 3,83E-02 | 0,51 |
| PCSK5   | cg21172497 | 9  | 78 510 119  | -0,091 | 6,55E-07 | 4,40E-06 | 1767934 | -0,012 | 1,52E-13 | 7,67E-10 | 0,51 |
| CDH23   | cg22646408 | 10 | 73 256 318  | -0,094 | 3,99E-09 | 5,91E-08 | 1783149 | -0,010 | 4,44E-08 | 2,04E-05 | 0,51 |
| FBLN2   | cg16157615 | 3  | 13 607 231  | -0,078 | 1,59E-10 | 4,06E-09 | 2390919 | -0,009 | 1,62E-17 | 2,18E-13 | 0,51 |
| ZNF256  | cg00541956 | 19 | 58 455 018  | -0,054 | 1,39E-09 | 2,47E-08 | 1757408 | -0,009 | 5,63E-07 | 1,54E-04 | 0,51 |
| CDH23   | cg13714026 | 10 | 73 385 503  | -0,065 | 6,73E-08 | 6,29E-07 | 1783149 | -0,010 | 4,44E-08 | 2,04E-05 | 0,52 |
| ACTN1   | cg15364504 | 14 | 69 416 134  | -0,053 | 4,01E-08 | 4,07E-07 | 2232177 | -0,017 | 1,94E-07 | 6,35E-05 | 0,52 |
| PDE9A   | cg00118229 | 21 | 44 088 420  | -0,073 | 1,21E-07 | 1,04E-06 | 2306540 | -0,015 | 1,61E-11 | 2,96E-08 | 0,52 |



|        |            |    |             |        |          |          |         |        |          |          |      |
|--------|------------|----|-------------|--------|----------|----------|---------|--------|----------|----------|------|
| NRCAM  | cg16073236 | 7  | 107 789 943 | -0,065 | 5,08E-07 | 3,52E-06 | 2411236 | -0,020 | 2,37E-21 | 9,60E-17 | 0,53 |
| ABLIM1 | cg27290215 | 10 | 116 392 933 | -0,083 | 6,33E-10 | 1,28E-08 | 1785424 | -0,018 | 9,63E-12 | 1,95E-08 | 0,53 |
| FBLN2  | cg14789121 | 3  | 13 675 521  | -0,053 | 5,79E-10 | 1,18E-08 | 2390919 | -0,009 | 1,62E-17 | 2,18E-13 | 0,53 |
| NRCAM  | cg25311470 | 7  | 107 950 866 | -0,064 | 5,95E-11 | 1,82E-09 | 1722809 | -0,008 | 3,07E-16 | 3,11E-12 | 0,54 |
| DLL1   | cg13250324 | 6  | 170 591 863 | -0,066 | 4,71E-07 | 3,30E-06 | 1743373 | -0,006 | 1,96E-06 | 4,28E-04 | 0,55 |
| PCSK5  | cg14349078 | 9  | 78 547 359  | -0,123 | 4,23E-09 | 6,20E-08 | 1767934 | -0,012 | 1,52E-13 | 7,67E-10 | 0,56 |
| FBLN2  | cg14789121 | 3  | 13 675 521  | -0,053 | 5,79E-10 | 1,18E-08 | 1774602 | -0,011 | 2,16E-19 | 4,36E-15 | 0,57 |
| NRCAM  | cg23543795 | 7  | 107 965 081 | -0,096 | 3,11E-08 | 3,30E-07 | 2411236 | -0,020 | 2,37E-21 | 9,60E-17 | 0,58 |
| ABLIM1 | cg00950497 | 10 | 116 393 423 | -0,050 | 3,32E-08 | 3,49E-07 | 1785424 | -0,018 | 9,63E-12 | 1,95E-08 | 0,59 |
| FLNB   | cg01361263 | 3  | 58 051 763  | -0,071 | 2,83E-07 | 2,13E-06 | 1664922 | -0,013 | 3,39E-12 | 9,15E-09 | 0,59 |
| NRCAM  | cg25994871 | 7  | 107 967 614 | -0,080 | 2,90E-09 | 4,52E-08 | 2411236 | -0,020 | 2,37E-21 | 9,60E-17 | 0,59 |
| NRCAM  | cg00280235 | 7  | 107 797 076 | -0,112 | 2,02E-12 | 1,33E-10 | 1722809 | -0,008 | 3,07E-16 | 3,11E-12 | 0,59 |
| NRCAM  | cg25311470 | 7  | 107 950 866 | -0,064 | 5,95E-11 | 1,82E-09 | 2411236 | -0,020 | 2,37E-21 | 9,60E-17 | 0,60 |
| NRCAM  | cg24429533 | 7  | 107 886 896 | -0,083 | 2,57E-08 | 2,81E-07 | 2411236 | -0,020 | 2,37E-21 | 9,60E-17 | 0,61 |
| NRCAM  | cg00280235 | 7  | 107 797 076 | -0,112 | 2,02E-12 | 1,33E-10 | 2411236 | -0,020 | 2,37E-21 | 9,60E-17 | 0,64 |
| ACTN1  | cg20505457 | 14 | 69 388 953  | -0,055 | 1,40E-06 | 8,54E-06 | 2232177 | -0,017 | 1,94E-07 | 6,35E-05 | 0,68 |
| ABLIM1 | cg03850986 | 10 | 116 408 382 | -0,097 | 1,14E-12 | 8,76E-11 | 1785424 | -0,018 | 9,63E-12 | 1,95E-08 | 0,69 |

---

**Supplementary Table 3. List of enriched functional terms sorted by p-value. The results were generated with g:Profiler and are graphically depicted in Fig. 4C.**

| Query | query            | p.value | term.size | query.size | overlap.size | precision | recall | term.id    | subgr: term.name                               |
|-------|------------------|---------|-----------|------------|--------------|-----------|--------|------------|------------------------------------------------|
| CD8   | hypomethylation  | 0,00023 | 155       | 82         | 8            | 0,098     | 0,052  | GO:0002263 | 22 cell activation involved in immune response |
| CD8   | hypomethylation  | 0,00031 | 224       | 82         | 9            | 0,11      | 0,04   | GO:0018108 | 26 peptidyl-tyrosine phosphorylation           |
| CD8   | hypomethylation  | 0,00108 | 854       | 92         | 16           | 0,174     | 0,019  | GO:0051336 | 4 regulation of hydrolase activity             |
| CD8   | hypermethylation | 0,00242 | 82        | 103        | 5            | 0,049     | 0,061  | KEGG:04520 | 4 Adherens junction                            |
| CD8   | hypomethylation  | 0,00449 | 221       | 105        | 8            | 0,076     | 0,036  | KEGG:04810 | 13 Regulation of actin cytoskeleton            |
| CD8   | hypomethylation  | 0,0106  | 90        | 97         | 5            | 0,052     | 0,056  | KEGG:05215 | 5 Prostate cancer                              |
| CD8   | hypomethylation  | 0,0134  | 696       | 105        | 14           | 0,133     | 0,02   | GO:0042060 | 28 wound healing                               |
| CD8   | hypermethylation | 0,0153  | 536       | 138        | 14           | 0,101     | 0,026  | GO:0010942 | 5 positive regulation of cell death            |
| CD8   | hypermethylation | 0,0215  | 270       | 142        | 10           | 0,07      | 0,037  | GO:0030098 | 8 lymphocyte differentiation                   |
| CD8   | hypomethylation  | 0,0222  | 122       | 91         | 6            | 0,066     | 0,049  | GO:0008360 | 10 regulation of cell shape                    |
| CD8   | hypomethylation  | 0,0273  | 597       | 97         | 12           | 0,124     | 0,02   | GO:0031347 | 12 regulation of defense response              |
| CD8   | hypermethylation | 0,0279  | 784       | 142        | 17           | 0,12      | 0,022  | GO:0007417 | 2 central nervous system development           |
| CD8   | hypomethylation  | 0,0347  | 562       | 105        | 12           | 0,114     | 0,021  | GO:0007596 | 29 blood coagulation                           |
| CD8   | hypomethylation  | 0,0347  | 562       | 105        | 12           | 0,114     | 0,021  | GO:0030029 | 14 actin filament-based process                |
| CD8   | hypomethylation  | 0,0349  | 599       | 84         | 11           | 0,131     | 0,018  | GO:0001816 | 9 cytokine production                          |
| CD8   | hypermethylation | 0,0442  | 486       | 145        | 13           | 0,09      | 0,027  | GO:0030036 | 9 actin cytoskeleton organization              |

**Supplementary Table 4. oPOSSUM analysis of transcription factor binding sites in gene promoters with inverse correlation of methylation and expression (log value >6).**

| TF                | Family                    | Target gene hits | Target gene non-hits | Background gene hits | Background gene non-hits | Target TFBS hits | Background TFBS hits | Z-score <sup>+</sup> | Fisher score <sup>**</sup> |
|-------------------|---------------------------|------------------|----------------------|----------------------|--------------------------|------------------|----------------------|----------------------|----------------------------|
| <b>Klf4</b>       | BetaBetaAlpha-zinc finger | 430              | 190                  | 13645                | 11107                    | 3375             | 88731                | 20.068               | 28.227                     |
| <b>SP1</b>        | BetaBetaAlpha-zinc finger | 383              | 237                  | 12391                | 12361                    | 3033             | 79797                | 18.872               | 19.214                     |
| <b>MZF1(1-4)</b>  | BetaBetaAlpha-zinc finger | 494              | 126                  | 16863                | 7889                     | 7431             | 201000               | 17.058               | 22.637                     |
| <b>MZF1(5-13)</b> | BetaBetaAlpha-zinc finger | 396              | 224                  | 13425                | 11327                    | 2870             | 77649                | 13.560               | 13.823                     |
| <b>SPIB</b>       | Ets                       | 507              | 113                  | 17547                | 7205                     | 6336             | 175639               | 11.758               | 21.472                     |
| <b>ZNF354C</b>    | BetaBetaAlpha-zinc finger | 501              | 119                  | 17566                | 7186                     | 7486             | 207738               | 11.607               | 17.787                     |
| <b>RUNX1</b>      | Runt                      | 392              | 228                  | 13641                | 11111                    | 2157             | 58648                | 11.536               | 10.368                     |
| <b>ELF5</b>       | Ets                       | 475              | 145                  | 16547                | 8205                     | 4249             | 117435               | 11.482               | 16.168                     |
| <b>Myb</b>        | Myb                       | 399              | 221                  | 13518                | 11234                    | 2168             | 58600                | 10.621               | 14.123                     |
| <b>FEV</b>        | Ets                       | 454              | 166                  | 15402                | 9350                     | 2978             | 81722                | 10.121               | 18.785                     |

\* The Z-score is a normalized difference between the actual rate of occurrence of a TFBS in the target gene set and the expected rate of occurrence (computed from a set of background genes).

\*\*The Fisher score is based on one-tailed Fisher exact test.

**Supplementary Table 5. Oligonucleotides used for the Sequenom MassArray and RT-PCR experiments.**

| <b>Amplicon</b> | <b>Sense</b>                             | <b>Antisense</b>                                         | <b>Assay</b> |
|-----------------|------------------------------------------|----------------------------------------------------------|--------------|
| IFNG            | aggaagagagTTTAAAATGATTGTTTATAAGAGATGATAG | cagtaatcgactcactatagggagaaggctCAACAACCAAAAAAATACAACACA   | MassARRAY    |
| GZMH            | aggaagagagATTTGTTGGGTGTGTGTAATTTTGT      | cagtaatcgactcactatagggagaaggctAAACCAAAAATATCTCCTTTTCTCAA | MassARRAY    |
| CCR7            | aggaagagagGTTATTGGTGATGTTGAAGTTGGTT      | cagtaatcgactcactatagggagaaggctTCCATCCCAAACTCCTATACAATA   | MassARRAY    |
| CD248           | aggaagagagGGGGTGTAGATTTTTTTTATGGAGT      | cagtaatcgactcactatagggagaaggctTTTTACTAAATCCTCCCAAAACCTC  | MassARRAY    |
| SATB1           | aggaagagagGGGATTATATTTTTTTTATGGAG        | cagtaatcgactcactatagggagaaggctCTAAAAATTCCTCCAACTTCCACT   | MassARRAY    |
| CD27            | aggaagagagTATAAAAGTGAGGAGTGAGTAAGGGTT    | cagtaatcgactcactatagggagaaggctACCACAAAACACCCTTAAAAATTA   | MassARRAY    |
| IFNG            | TGGAAAGAGGAGAGTGACAG                     | TGGTCTCCACACTCTTTTGG                                     | RT-qPCR      |
| GZMH            | TGGCGGCATCCTAGTGAGAA                     | GCCCCAAGGTGACATTTATG                                     | RT-qPCR      |
| CCR7            | CTTGTCATTTTCCAGGTATGCC                   | GGAGCACAAGACTCGAACA                                      | RT-qPCR      |
| CD248           | GCTGGACAGATGGCTTCC                       | GTGTATCCTTGGTCACGAGC                                     | RT-qPCR      |
| SATB1           | CCATGTTCCAGCAGAGCAGATT                   | TCTGTGGCTGCTGCTGTG                                       | RT-qPCR      |
| CD27            | GGCCACCCCAAAGATCCC                       | TCGTTGATGGAGGAACAGGG                                     | RT-qPCR      |
